# Supplementary material for: Simulating cold-region hydrology in an intensively drained agricultural watershed in Manitoba, Canada, using the Cold Regions Hydrological Model
Source: Copernicus journal article supplement (doi:10.5194/hess-2016-462), 2016-09-27
Supplement: Supplementary file 1 [file Cordeiro2016_PlotDataFig02.xlsx]

## Sheet: Sheet1
Area planted in the actual crop rotation						Area planted in the land use split method
Rotation Year	Spring Wheat	Canola	Winter wheat	Canola		Rotation Year	1	2	3	4
1	100					Spring Wheat	25	25	25	25
2		100				Canola	50	50	50	50
3			100			Winter wheat	25	25	25	25
4				100
