# Supplementary material for: Simulating cold-region hydrology in an intensively drained agricultural watershed in Manitoba, Canada, using the Cold Regions Hydrological Model
Source: Copernicus journal article supplement (doi:10.5194/hess-2016-462), 2016-09-27
Supplement: Supplementary file 3 [file Cordeiro2016_PlotDataFig03.xlsx]

## Sheet: Sheet1
	Discharge (m^3/s)
Date	Normal flow conditions	Backwater conditions	Period removed from analysis in 2005
1/1/2005
1/2/2005
1/3/2005
1/4/2005
1/5/2005
1/6/2005
1/7/2005
1/8/2005
1/9/2005
1/10/2005
1/11/2005
1/12/2005
1/13/2005
1/14/2005
1/15/2005
1/16/2005
1/17/2005
1/18/2005
1/19/2005
1/20/2005
1/21/2005
1/22/2005
1/23/2005
1/24/2005
1/25/2005
1/26/2005
1/27/2005
1/28/2005
1/29/2005
1/30/2005
1/31/2005
2/1/2005
2/2/2005
2/3/2005
2/4/2005
2/5/2005
2/6/2005
2/7/2005
2/8/2005
2/9/2005
2/10/2005
2/11/2005
2/12/2005
2/13/2005
2/14/2005
2/15/2005
2/16/2005
2/17/2005
2/18/2005
2/19/2005
2/20/2005
2/21/2005
2/22/2005
2/23/2005
2/24/2005
2/25/2005
2/26/2005
2/27/2005
2/28/2005
3/1/2005	0.122
3/2/2005	0.092
3/3/2005	0.078
3/4/2005	0.064
3/5/2005	0.118
3/6/2005	0.144
3/7/2005	0.133
3/8/2005	0.105
3/9/2005	0.059
3/10/2005	0.05
3/11/2005	0.139
3/12/2005	0.108
3/13/2005	0.099
3/14/2005	0.109
3/15/2005	0.102
3/16/2005	0.082
3/17/2005	0.119
3/18/2005	0.086
3/19/2005	0.11
3/20/2005	0.123
3/21/2005	0.085
3/22/2005	0.087
3/23/2005	0.113
3/24/2005	0.096
3/25/2005	0.056
3/26/2005	0.028
3/27/2005	0.099
3/28/2005	0.115
3/29/2005	0.153
3/30/2005	0.526
3/31/2005	1.12
4/1/2005	2.14
4/2/2005	3.71
4/3/2005	6.68	6.68
4/4/2005		8.77
4/5/2005		9.36
4/6/2005		9.63
4/7/2005		9.95
4/8/2005		10
4/9/2005		9.67
4/10/2005		9.2
4/11/2005		8.69
4/12/2005		7.86
4/13/2005		7.37
4/14/2005	6.28	6.28
4/15/2005	4.73
4/16/2005	3.22
4/17/2005	2.39
4/18/2005	1.87
4/19/2005	1.39
4/20/2005	1.04
4/21/2005	0.803
4/22/2005	0.596
4/23/2005	0.459
4/24/2005	0.373
4/25/2005	0.313
4/26/2005	0.277
4/27/2005	0.254
4/28/2005	0.235
4/29/2005	0.224
4/30/2005	0.22
5/1/2005	0.25
5/2/2005	0.296
5/3/2005	0.278
5/4/2005	0.252
5/5/2005	0.222
5/6/2005	0.195
5/7/2005	0.23
5/8/2005	0.226
5/9/2005	0.233
5/10/2005	0.299
5/11/2005	0.289
5/12/2005	0.254
5/13/2005	0.252
5/14/2005	0.24
5/15/2005	0.211
5/16/2005	0.208
5/17/2005	0.332
5/18/2005	0.368
5/19/2005	0.331
5/20/2005	0.297
5/21/2005	0.443
5/22/2005	0.583
5/23/2005	0.708
5/24/2005	0.765
5/25/2005	0.711
5/26/2005	0.627
5/27/2005	0.606
5/28/2005	0.605
5/29/2005	0.582
5/30/2005	0.546
5/31/2005	0.523
6/1/2005	0.52
6/2/2005	0.622
6/3/2005	0.598
6/4/2005	0.471
6/5/2005	0.381
6/6/2005	0.346
6/7/2005	0.354
6/8/2005	0.413
6/9/2005	0.782
6/10/2005	0.791
6/11/2005	2
6/12/2005	3.73
6/13/2005	3.97
6/14/2005	3.79
6/15/2005	3.75
6/16/2005	3.1
6/17/2005	2.47
6/18/2005	1.89
6/19/2005	1.5
6/20/2005	1.21
6/21/2005	1.03
6/22/2005	0.858
6/23/2005	0.75
6/24/2005	0.581
6/25/2005	0.51
6/26/2005	0.67
6/27/2005	2.74
6/28/2005	5.22		16
6/29/2005	6.93	6.93
6/30/2005		10.2
7/1/2005		11.1
7/2/2005		10.8
7/3/2005		10.2
7/4/2005		9.63
7/5/2005		9.68
7/6/2005		9.7
7/7/2005		9.58
7/8/2005		9.77
7/9/2005		9.73
7/10/2005		9.65
7/11/2005		9.97
7/12/2005		10.3
7/13/2005		10.4
7/14/2005		10.3
7/15/2005		9.75
7/16/2005		8.5
7/17/2005		9.61
7/18/2005		10.3
7/19/2005		10.2
7/20/2005		9.98
7/21/2005		9.21
7/22/2005		8.39
7/23/2005		7.1
7/24/2005	5.81	5.81
7/25/2005	4.72
7/26/2005	3.82
7/27/2005	3.23
7/28/2005	2.68
7/29/2005	2.1
7/30/2005	1.58
7/31/2005	4.71		16
8/1/2005
8/2/2005
8/3/2005
8/4/2005
8/5/2005
8/6/2005
8/7/2005
8/8/2005
8/9/2005
8/10/2005
8/11/2005
8/12/2005
8/13/2005
8/14/2005
8/15/2005
8/16/2005
8/17/2005
8/18/2005
8/19/2005
8/20/2005
8/21/2005
8/22/2005
8/23/2005
8/24/2005
8/25/2005
8/26/2005
8/27/2005
8/28/2005
8/29/2005
8/30/2005
8/31/2005
9/1/2005
9/2/2005
9/3/2005
9/4/2005
9/5/2005
9/6/2005
9/7/2005
9/8/2005
9/9/2005
9/10/2005
9/11/2005
9/12/2005
9/13/2005
9/14/2005
9/15/2005
9/16/2005
9/17/2005
9/18/2005
9/19/2005
9/20/2005
9/21/2005
9/22/2005
9/23/2005
9/24/2005
9/25/2005
9/26/2005
9/27/2005
9/28/2005
9/29/2005
9/30/2005
10/1/2005
10/2/2005
10/3/2005
10/4/2005
10/5/2005
10/6/2005
10/7/2005
10/8/2005
10/9/2005
10/10/2005
10/11/2005
10/12/2005
10/13/2005
10/14/2005
10/15/2005
10/16/2005
10/17/2005
10/18/2005
10/19/2005
10/20/2005
10/21/2005
10/22/2005
10/23/2005
10/24/2005
10/25/2005
10/26/2005
10/27/2005
10/28/2005
10/29/2005
10/30/2005
10/31/2005
11/1/2005
11/2/2005
11/3/2005
11/4/2005
11/5/2005
11/6/2005
11/7/2005
11/8/2005
11/9/2005
11/10/2005
11/11/2005
11/12/2005
11/13/2005
11/14/2005
11/15/2005
11/16/2005
11/17/2005
11/18/2005
11/19/2005
11/20/2005
11/21/2005
11/22/2005
11/23/2005
11/24/2005
11/25/2005
11/26/2005
11/27/2005
11/28/2005
11/29/2005
11/30/2005
12/1/2005
12/2/2005
12/3/2005
12/4/2005
12/5/2005
12/6/2005
12/7/2005
12/8/2005
12/9/2005
12/10/2005
12/11/2005
12/12/2005
12/13/2005
12/14/2005
12/15/2005
12/16/2005
12/17/2005
12/18/2005
12/19/2005
12/20/2005
12/21/2005
12/22/2005
12/23/2005
12/24/2005
12/25/2005
12/26/2005
12/27/2005
12/28/2005
12/29/2005
12/30/2005
12/31/2005
1/1/2006
1/2/2006
1/3/2006
1/4/2006
1/5/2006
1/6/2006
1/7/2006
1/8/2006
1/9/2006
1/10/2006
1/11/2006
1/12/2006
1/13/2006
1/14/2006
1/15/2006
1/16/2006
1/17/2006
1/18/2006
1/19/2006
1/20/2006
1/21/2006
1/22/2006
1/23/2006
1/24/2006
1/25/2006
1/26/2006
1/27/2006
1/28/2006
1/29/2006
1/30/2006
1/31/2006
2/1/2006
2/2/2006
2/3/2006
2/4/2006
2/5/2006
2/6/2006
2/7/2006
2/8/2006
2/9/2006
2/10/2006
2/11/2006
2/12/2006
2/13/2006
2/14/2006
2/15/2006
2/16/2006
2/17/2006
2/18/2006
2/19/2006
2/20/2006
2/21/2006
2/22/2006
2/23/2006
2/24/2006
2/25/2006
2/26/2006
2/27/2006
2/28/2006
3/1/2006	0.141
3/2/2006	0.166
3/3/2006	0.159
3/4/2006	0.164
3/5/2006	0.189
3/6/2006	0.203
3/7/2006	0.208
3/8/2006	0.203
3/9/2006	0.193
3/10/2006	0.185
3/11/2006	0.174
3/12/2006	0.156
3/13/2006	0.144
3/14/2006	0.128
3/15/2006	0.136
3/16/2006	0.128
3/17/2006	0.115
3/18/2006	0.093
3/19/2006	0.075
3/20/2006	0.061
3/21/2006	0.052
3/22/2006	0.053
3/23/2006	0.038
3/24/2006	0.031
3/25/2006	0.043
3/26/2006	0.059
3/27/2006	0.07
3/28/2006	0.089
3/29/2006	0.095
3/30/2006	0.107
3/31/2006	0.4
4/1/2006	1.89
4/2/2006	3.83
4/3/2006	5.59	5.59
4/4/2006		7.9
4/5/2006		9.43
4/6/2006		11.1
4/7/2006		13.5
4/8/2006		14.7
4/9/2006		15.6
4/10/2006		16.5
4/11/2006		16.3
4/12/2006		16.1
4/13/2006		15.3
4/14/2006		14.2
4/15/2006		12.8
4/16/2006		11.4
4/17/2006		10.2
4/18/2006		8.66
4/19/2006	6.11	6.11
4/20/2006	3.67
4/21/2006	2.33
4/22/2006	1.8
4/23/2006	1.59
4/24/2006	1.32
4/25/2006	1.15
4/26/2006	1.04
4/27/2006	0.939
4/28/2006	0.911
4/29/2006	0.878
4/30/2006	0.871
5/1/2006	0.89
5/2/2006	0.957
5/3/2006	0.95
5/4/2006	0.89
5/5/2006	0.815
5/6/2006	0.784
5/7/2006	0.703
5/8/2006	0.652
5/9/2006	0.641
5/10/2006	0.602
5/11/2006	0.594
5/12/2006	0.598
5/13/2006	0.623
5/14/2006	0.629
5/15/2006	0.614
5/16/2006	0.596
5/17/2006	0.563
5/18/2006	0.523
5/19/2006	0.569
5/20/2006	0.921
5/21/2006	0.899
5/22/2006	0.617
5/23/2006	0.5
5/24/2006	0.514
5/25/2006	0.495
5/26/2006	0.461
5/27/2006	0.558
5/28/2006	0.599
5/29/2006	0.577
5/30/2006	0.56
5/31/2006	0.53
6/1/2006
6/2/2006
6/3/2006
6/4/2006
6/5/2006
6/6/2006
6/7/2006
6/8/2006
6/9/2006
6/10/2006
6/11/2006
6/12/2006
6/13/2006
6/14/2006
6/15/2006
6/16/2006
6/17/2006
6/18/2006
6/19/2006
6/20/2006
6/21/2006
6/22/2006
6/23/2006
6/24/2006
6/25/2006
6/26/2006
6/27/2006
6/28/2006
6/29/2006
6/30/2006
7/1/2006
7/2/2006
7/3/2006
7/4/2006
7/5/2006
7/6/2006
7/7/2006
7/8/2006
7/9/2006
7/10/2006
7/11/2006
7/12/2006
7/13/2006
7/14/2006
7/15/2006
7/16/2006
7/17/2006
7/18/2006
7/19/2006
7/20/2006
7/21/2006
7/22/2006
7/23/2006
7/24/2006
7/25/2006
7/26/2006
7/27/2006
7/28/2006
7/29/2006
7/30/2006
7/31/2006
8/1/2006
8/2/2006
8/3/2006
8/4/2006
8/5/2006
8/6/2006
8/7/2006
8/8/2006
8/9/2006
8/10/2006
8/11/2006
8/12/2006
8/13/2006
8/14/2006
8/15/2006
8/16/2006
8/17/2006
8/18/2006
8/19/2006
8/20/2006
8/21/2006
8/22/2006
8/23/2006
8/24/2006
8/25/2006
8/26/2006
8/27/2006
8/28/2006
8/29/2006
8/30/2006
8/31/2006
9/1/2006
9/2/2006
9/3/2006
9/4/2006
9/5/2006
9/6/2006
9/7/2006
9/8/2006
9/9/2006
9/10/2006
9/11/2006
9/12/2006
9/13/2006
9/14/2006
9/15/2006
9/16/2006
9/17/2006
9/18/2006
9/19/2006
9/20/2006
9/21/2006
9/22/2006
9/23/2006
9/24/2006
9/25/2006
9/26/2006
9/27/2006
9/28/2006
9/29/2006
9/30/2006
10/1/2006
10/2/2006
10/3/2006
10/4/2006
10/5/2006
10/6/2006
10/7/2006
10/8/2006
10/9/2006
10/10/2006
10/11/2006
10/12/2006
10/13/2006
10/14/2006
10/15/2006
10/16/2006
10/17/2006
10/18/2006
10/19/2006
10/20/2006
10/21/2006
10/22/2006
10/23/2006
10/24/2006
10/25/2006
10/26/2006
10/27/2006
10/28/2006
10/29/2006
10/30/2006
10/31/2006
11/1/2006
11/2/2006
11/3/2006
11/4/2006
11/5/2006
11/6/2006
11/7/2006
11/8/2006
11/9/2006
11/10/2006
11/11/2006
11/12/2006
11/13/2006
11/14/2006
11/15/2006
11/16/2006
11/17/2006
11/18/2006
11/19/2006
11/20/2006
11/21/2006
11/22/2006
11/23/2006
11/24/2006
11/25/2006
11/26/2006
11/27/2006
11/28/2006
11/29/2006
11/30/2006
12/1/2006
12/2/2006
12/3/2006
12/4/2006
12/5/2006
12/6/2006
12/7/2006
12/8/2006
12/9/2006
12/10/2006
12/11/2006
12/12/2006
12/13/2006
12/14/2006
12/15/2006
12/16/2006
12/17/2006
12/18/2006
12/19/2006
12/20/2006
12/21/2006
12/22/2006
12/23/2006
12/24/2006
12/25/2006
12/26/2006
12/27/2006
12/28/2006
12/29/2006
12/30/2006
12/31/2006
1/1/2007
1/2/2007
1/3/2007
1/4/2007
1/5/2007
1/6/2007
1/7/2007
1/8/2007
1/9/2007
1/10/2007
1/11/2007
1/12/2007
1/13/2007
1/14/2007
1/15/2007
1/16/2007
1/17/2007
1/18/2007
1/19/2007
1/20/2007
1/21/2007
1/22/2007
1/23/2007
1/24/2007
1/25/2007
1/26/2007
1/27/2007
1/28/2007
1/29/2007
1/30/2007
1/31/2007
2/1/2007
2/2/2007
2/3/2007
2/4/2007
2/5/2007
2/6/2007
2/7/2007
2/8/2007
2/9/2007
2/10/2007
2/11/2007
2/12/2007
2/13/2007
2/14/2007
2/15/2007
2/16/2007
2/17/2007
2/18/2007
2/19/2007
2/20/2007
2/21/2007
2/22/2007
2/23/2007
2/24/2007
2/25/2007
2/26/2007
2/27/2007
2/28/2007
3/1/2007	0.059
3/2/2007	0.052
3/3/2007	0.046
3/4/2007	0.047
3/5/2007	0.05
3/6/2007	0.052
3/7/2007	0.052
3/8/2007	0.052
3/9/2007	0.053
3/10/2007	0.061
3/11/2007	0.069
3/12/2007	0.073
3/13/2007	0.069
3/14/2007	0.068
3/15/2007	0.062
3/16/2007	0.065
3/17/2007	0.061
3/18/2007	0.066
3/19/2007	0.083
3/20/2007	0.104
3/21/2007	0.114
3/22/2007	0.144
3/23/2007	0.152
3/24/2007	0.219
3/25/2007	0.339
3/26/2007	0.478
3/27/2007	0.54
3/28/2007	0.662
3/29/2007	1.66
3/30/2007	2.86
3/31/2007	3.2	3.2
4/1/2007		3.77
4/2/2007		4.32
4/3/2007		4.35
4/4/2007		4.35
4/5/2007		4.33
4/6/2007		3.95
4/7/2007		3.49
4/8/2007		3.57
4/9/2007		3.8
4/10/2007		4.06
4/11/2007		4.36
4/12/2007		4.57
4/13/2007	3.89	3.89
4/14/2007	2.11
4/15/2007	0.913
4/16/2007	1.21
4/17/2007	1.18
4/18/2007	0.764
4/19/2007	0.522
4/20/2007	0.364
4/21/2007	0.328
4/22/2007	0.313
4/23/2007	0.337
4/24/2007	0.395
4/25/2007	0.448
4/26/2007	0.398
4/27/2007	0.329
4/28/2007	0.275
4/29/2007	0.241
4/30/2007	0.211
5/1/2007	0.179
5/2/2007	0.135
5/3/2007	0.116
5/4/2007	0.14
5/5/2007	0.173
5/6/2007	0.208
5/7/2007	0.182
5/8/2007	0.13
5/9/2007	0.148
5/10/2007	0.288
5/11/2007	0.385
5/12/2007	0.447
5/13/2007	0.468
5/14/2007	0.448
5/15/2007	0.39
5/16/2007	0.294
5/17/2007	0.248
5/18/2007	0.238
5/19/2007	0.233
5/20/2007	0.237
5/21/2007	0.248
5/22/2007	0.445
5/23/2007	0.459
5/24/2007	0.397
5/25/2007	0.377
5/26/2007	0.42
5/27/2007	0.426
5/28/2007	0.398
5/29/2007	0.371
5/30/2007	0.329
5/31/2007	0.297
6/1/2007
6/2/2007
6/3/2007
6/4/2007
6/5/2007
6/6/2007
6/7/2007
6/8/2007
6/9/2007
6/10/2007
6/11/2007
6/12/2007
6/13/2007
6/14/2007
6/15/2007
6/16/2007
6/17/2007
6/18/2007
6/19/2007
6/20/2007
6/21/2007
6/22/2007
6/23/2007
6/24/2007
6/25/2007
6/26/2007
6/27/2007
6/28/2007
6/29/2007
6/30/2007
7/1/2007
7/2/2007
7/3/2007
7/4/2007
7/5/2007
7/6/2007
7/7/2007
7/8/2007
7/9/2007
7/10/2007
7/11/2007
7/12/2007
7/13/2007
7/14/2007
7/15/2007
7/16/2007
7/17/2007
7/18/2007
7/19/2007
7/20/2007
7/21/2007
7/22/2007
7/23/2007
7/24/2007
7/25/2007
7/26/2007
7/27/2007
7/28/2007
7/29/2007
7/30/2007
7/31/2007
8/1/2007
8/2/2007
8/3/2007
8/4/2007
8/5/2007
8/6/2007
8/7/2007
8/8/2007
8/9/2007
8/10/2007
8/11/2007
8/12/2007
8/13/2007
8/14/2007
8/15/2007
8/16/2007
8/17/2007
8/18/2007
8/19/2007
8/20/2007
8/21/2007
8/22/2007
8/23/2007
8/24/2007
8/25/2007
8/26/2007
8/27/2007
8/28/2007
8/29/2007
8/30/2007
8/31/2007
9/1/2007
9/2/2007
9/3/2007
9/4/2007
9/5/2007
9/6/2007
9/7/2007
9/8/2007
9/9/2007
9/10/2007
9/11/2007
9/12/2007
9/13/2007
9/14/2007
9/15/2007
9/16/2007
9/17/2007
9/18/2007
9/19/2007
9/20/2007
9/21/2007
9/22/2007
9/23/2007
9/24/2007
9/25/2007
9/26/2007
9/27/2007
9/28/2007
9/29/2007
9/30/2007
10/1/2007
10/2/2007
10/3/2007
10/4/2007
10/5/2007
10/6/2007
10/7/2007
10/8/2007
10/9/2007
10/10/2007
10/11/2007
10/12/2007
10/13/2007
10/14/2007
10/15/2007
10/16/2007
10/17/2007
10/18/2007
10/19/2007
10/20/2007
10/21/2007
10/22/2007
10/23/2007
10/24/2007
10/25/2007
10/26/2007
10/27/2007
10/28/2007
10/29/2007
10/30/2007
10/31/2007
11/1/2007
11/2/2007
11/3/2007
11/4/2007
11/5/2007
11/6/2007
11/7/2007
11/8/2007
11/9/2007
11/10/2007
11/11/2007
11/12/2007
11/13/2007
11/14/2007
11/15/2007
11/16/2007
11/17/2007
11/18/2007
11/19/2007
11/20/2007
11/21/2007
11/22/2007
11/23/2007
11/24/2007
11/25/2007
11/26/2007
11/27/2007
11/28/2007
11/29/2007
11/30/2007
12/1/2007
12/2/2007
12/3/2007
12/4/2007
12/5/2007
12/6/2007
12/7/2007
12/8/2007
12/9/2007
12/10/2007
12/11/2007
12/12/2007
12/13/2007
12/14/2007
12/15/2007
12/16/2007
12/17/2007
12/18/2007
12/19/2007
12/20/2007
12/21/2007
12/22/2007
12/23/2007
12/24/2007
12/25/2007
12/26/2007
12/27/2007
12/28/2007
12/29/2007
12/30/2007
12/31/2007
1/1/2008
1/2/2008
1/3/2008
1/4/2008
1/5/2008
1/6/2008
1/7/2008
1/8/2008
1/9/2008
1/10/2008
1/11/2008
1/12/2008
1/13/2008
1/14/2008
1/15/2008
1/16/2008
1/17/2008
1/18/2008
1/19/2008
1/20/2008
1/21/2008
1/22/2008
1/23/2008
1/24/2008
1/25/2008
1/26/2008
1/27/2008
1/28/2008
1/29/2008
1/30/2008
1/31/2008
2/1/2008
2/2/2008
2/3/2008
2/4/2008
2/5/2008
2/6/2008
2/7/2008
2/8/2008
2/9/2008
2/10/2008
2/11/2008
2/12/2008
2/13/2008
2/14/2008
2/15/2008
2/16/2008
2/17/2008
2/18/2008
2/19/2008
2/20/2008
2/21/2008
2/22/2008
2/23/2008
2/24/2008
2/25/2008
2/26/2008
2/27/2008
2/28/2008
2/29/2008
3/1/2008
3/2/2008
3/3/2008
3/4/2008
3/5/2008
3/6/2008
3/7/2008
3/8/2008
3/9/2008
3/10/2008
3/11/2008
3/12/2008
3/13/2008
3/14/2008
3/15/2008
3/16/2008
3/17/2008
3/18/2008
3/19/2008
3/20/2008
3/21/2008
3/22/2008
3/23/2008
3/24/2008
3/25/2008
3/26/2008
3/27/2008
3/28/2008
3/29/2008
3/30/2008
3/31/2008
4/1/2008
4/2/2008
4/3/2008
4/4/2008
4/5/2008
4/6/2008
4/7/2008
4/8/2008
4/9/2008
4/10/2008
4/11/2008
4/12/2008
4/13/2008
4/14/2008
4/15/2008
4/16/2008
4/17/2008
4/18/2008
4/19/2008
4/20/2008
4/21/2008
4/22/2008
4/23/2008
4/24/2008
4/25/2008
4/26/2008
4/27/2008
4/28/2008
4/29/2008
4/30/2008
5/1/2008
5/2/2008
5/3/2008
5/4/2008
5/5/2008
5/6/2008
5/7/2008
5/8/2008
5/9/2008
5/10/2008
5/11/2008
5/12/2008
5/13/2008
5/14/2008
5/15/2008
5/16/2008
5/17/2008
5/18/2008
5/19/2008
5/20/2008
5/21/2008
5/22/2008
5/23/2008
5/24/2008
5/25/2008
5/26/2008
5/27/2008
5/28/2008
5/29/2008
5/30/2008
5/31/2008
6/1/2008
6/2/2008
6/3/2008
6/4/2008
6/5/2008
6/6/2008
6/7/2008
6/8/2008
6/9/2008
6/10/2008
6/11/2008
6/12/2008
6/13/2008
6/14/2008
6/15/2008
6/16/2008
6/17/2008
6/18/2008
6/19/2008
6/20/2008
6/21/2008
6/22/2008
6/23/2008
6/24/2008
6/25/2008
6/26/2008
6/27/2008
6/28/2008
6/29/2008
6/30/2008
7/1/2008
7/2/2008
7/3/2008
7/4/2008
7/5/2008
7/6/2008
7/7/2008
7/8/2008
7/9/2008
7/10/2008
7/11/2008
7/12/2008
7/13/2008
7/14/2008
7/15/2008
7/16/2008
7/17/2008
7/18/2008
7/19/2008
7/20/2008
7/21/2008
7/22/2008
7/23/2008
7/24/2008
7/25/2008
7/26/2008
7/27/2008
7/28/2008
7/29/2008
7/30/2008
7/31/2008
8/1/2008
8/2/2008
8/3/2008
8/4/2008
8/5/2008
8/6/2008
8/7/2008
8/8/2008
8/9/2008
8/10/2008
8/11/2008
8/12/2008
8/13/2008
8/14/2008
8/15/2008
8/16/2008
8/17/2008
8/18/2008
8/19/2008
8/20/2008
8/21/2008
8/22/2008
8/23/2008
8/24/2008
8/25/2008
8/26/2008
8/27/2008
8/28/2008
8/29/2008
8/30/2008
8/31/2008
9/1/2008
9/2/2008
9/3/2008
9/4/2008
9/5/2008
9/6/2008
9/7/2008
9/8/2008
9/9/2008
9/10/2008
9/11/2008
9/12/2008
9/13/2008
9/14/2008
9/15/2008
9/16/2008
9/17/2008
9/18/2008
9/19/2008
9/20/2008
9/21/2008
9/22/2008
9/23/2008
9/24/2008
9/25/2008
9/26/2008
9/27/2008
9/28/2008
9/29/2008
9/30/2008
10/1/2008
10/2/2008
10/3/2008
10/4/2008
10/5/2008
10/6/2008
10/7/2008
10/8/2008
10/9/2008
10/10/2008
10/11/2008
10/12/2008
10/13/2008
10/14/2008
10/15/2008
10/16/2008
10/17/2008
10/18/2008
10/19/2008
10/20/2008
10/21/2008
10/22/2008
10/23/2008
10/24/2008
10/25/2008
10/26/2008
10/27/2008
10/28/2008
10/29/2008
10/30/2008
10/31/2008
11/1/2008
11/2/2008
11/3/2008
11/4/2008
11/5/2008
11/6/2008
11/7/2008
11/8/2008
11/9/2008
11/10/2008
11/11/2008
11/12/2008
11/13/2008
11/14/2008
11/15/2008
11/16/2008
11/17/2008
11/18/2008
11/19/2008
11/20/2008
11/21/2008
11/22/2008
11/23/2008
11/24/2008
11/25/2008
11/26/2008
11/27/2008
11/28/2008
11/29/2008
11/30/2008
12/1/2008
12/2/2008
12/3/2008
12/4/2008
12/5/2008
12/6/2008
12/7/2008
12/8/2008
12/9/2008
12/10/2008
12/11/2008
12/12/2008
12/13/2008
12/14/2008
12/15/2008
12/16/2008
12/17/2008
12/18/2008
12/19/2008
12/20/2008
12/21/2008
12/22/2008
12/23/2008
12/24/2008
12/25/2008
12/26/2008
12/27/2008
12/28/2008
12/29/2008
12/30/2008
12/31/2008
1/1/2009
1/2/2009
1/3/2009
1/4/2009
1/5/2009
1/6/2009
1/7/2009
1/8/2009
1/9/2009
1/10/2009
1/11/2009
1/12/2009
1/13/2009
1/14/2009
1/15/2009
1/16/2009
1/17/2009
1/18/2009
1/19/2009
1/20/2009
1/21/2009
1/22/2009
1/23/2009
1/24/2009
1/25/2009
1/26/2009
1/27/2009
1/28/2009
1/29/2009
1/30/2009
1/31/2009
2/1/2009
2/2/2009
2/3/2009
2/4/2009
2/5/2009
2/6/2009
2/7/2009
2/8/2009
2/9/2009
2/10/2009
2/11/2009
2/12/2009
2/13/2009
2/14/2009
2/15/2009
2/16/2009
2/17/2009
2/18/2009
2/19/2009
2/20/2009
2/21/2009
2/22/2009
2/23/2009
2/24/2009
2/25/2009
2/26/2009
2/27/2009
2/28/2009
3/1/2009	0.117
3/2/2009	0.11
3/3/2009	0.157
3/4/2009	0.167
3/5/2009	0.146
3/6/2009	0.127
3/7/2009	0.146
3/8/2009	0.141
3/9/2009	0.19
3/10/2009	0.15
3/11/2009	0.13
3/12/2009	0.142
3/13/2009	0.146
3/14/2009	0.167
3/15/2009	0.199
3/16/2009	0.19
3/17/2009	0.157
3/18/2009	0.135
3/19/2009	0.15
3/20/2009	0.196
3/21/2009	0.261
3/22/2009	0.263
3/23/2009	0.692
3/24/2009	0.923
3/25/2009	1.12
3/26/2009	0.84
3/27/2009	0.552
3/28/2009	0.346
3/29/2009	0.338
3/30/2009	0.515
3/31/2009	0.699
4/1/2009	0.551
4/2/2009	0.52
4/3/2009	0.539
4/4/2009	0.509
4/5/2009	0.569
4/6/2009	0.61
4/7/2009	0.733
4/8/2009	0.663
4/9/2009	0.953
4/10/2009	1.75
4/11/2009	3.48	3.48
4/12/2009		5.62
4/13/2009		7.22
4/14/2009		8.75
4/15/2009		10.8
4/16/2009		12.5
4/17/2009		13.3
4/18/2009		13
4/19/2009		12.6
4/20/2009		12.1
4/21/2009		11.5
4/22/2009		10.7
4/23/2009		9.97
4/24/2009		8.98
4/25/2009		7.82
4/26/2009	6.02	6.02
4/27/2009	4.08
4/28/2009	2.55
4/29/2009	1.66
4/30/2009	1.3
5/1/2009	0.949
5/2/2009	0.691
5/3/2009	0.533
5/4/2009	0.42
5/5/2009	0.36
5/6/2009	0.31
5/7/2009	0.28
5/8/2009	0.247
5/9/2009	0.239
5/10/2009	0.217
5/11/2009	0.198
5/12/2009	0.192
5/13/2009	0.5
5/14/2009	0.618
5/15/2009	1.06
5/16/2009	1.02
5/17/2009	0.76
5/18/2009	0.683
5/19/2009	0.575
5/20/2009	0.529
5/21/2009	0.496
5/22/2009	0.469
5/23/2009	0.454
5/24/2009	0.407
5/25/2009	0.408
5/26/2009	0.397
5/27/2009	0.361
5/28/2009	0.351
5/29/2009	0.328
5/30/2009	0.308
5/31/2009	0.322
6/1/2009
6/2/2009
6/3/2009
6/4/2009
6/5/2009
6/6/2009
6/7/2009
6/8/2009
6/9/2009
6/10/2009
6/11/2009
6/12/2009
6/13/2009
6/14/2009
6/15/2009
6/16/2009
6/17/2009
6/18/2009
6/19/2009
6/20/2009
6/21/2009
6/22/2009
6/23/2009
6/24/2009
6/25/2009
6/26/2009
6/27/2009
6/28/2009
6/29/2009
6/30/2009
7/1/2009
7/2/2009
7/3/2009
7/4/2009
7/5/2009
7/6/2009
7/7/2009
7/8/2009
7/9/2009
7/10/2009
7/11/2009
7/12/2009
7/13/2009
7/14/2009
7/15/2009
7/16/2009
7/17/2009
7/18/2009
7/19/2009
7/20/2009
7/21/2009
7/22/2009
7/23/2009
7/24/2009
7/25/2009
7/26/2009
7/27/2009
7/28/2009
7/29/2009
7/30/2009
7/31/2009
8/1/2009
8/2/2009
8/3/2009
8/4/2009
8/5/2009
8/6/2009
8/7/2009
8/8/2009
8/9/2009
8/10/2009
8/11/2009
8/12/2009
8/13/2009
8/14/2009
8/15/2009
8/16/2009
8/17/2009
8/18/2009
8/19/2009
8/20/2009
8/21/2009
8/22/2009
8/23/2009
8/24/2009
8/25/2009
8/26/2009
8/27/2009
8/28/2009
8/29/2009
8/30/2009
8/31/2009
9/1/2009
9/2/2009
9/3/2009
9/4/2009
9/5/2009
9/6/2009
9/7/2009
9/8/2009
9/9/2009
9/10/2009
9/11/2009
9/12/2009
9/13/2009
9/14/2009
9/15/2009
9/16/2009
9/17/2009
9/18/2009
9/19/2009
9/20/2009
9/21/2009
9/22/2009
9/23/2009
9/24/2009
9/25/2009
9/26/2009
9/27/2009
9/28/2009
9/29/2009
9/30/2009
10/1/2009
10/2/2009
10/3/2009
10/4/2009
10/5/2009
10/6/2009
10/7/2009
10/8/2009
10/9/2009
10/10/2009
10/11/2009
10/12/2009
10/13/2009
10/14/2009
10/15/2009
10/16/2009
10/17/2009
10/18/2009
10/19/2009
10/20/2009
10/21/2009
10/22/2009
10/23/2009
10/24/2009
10/25/2009
10/26/2009
10/27/2009
10/28/2009
10/29/2009
10/30/2009
10/31/2009
11/1/2009
11/2/2009
11/3/2009
11/4/2009
11/5/2009
11/6/2009
11/7/2009
11/8/2009
11/9/2009
11/10/2009
11/11/2009
11/12/2009
11/13/2009
11/14/2009
11/15/2009
11/16/2009
11/17/2009
11/18/2009
11/19/2009
11/20/2009
11/21/2009
11/22/2009
11/23/2009
11/24/2009
11/25/2009
11/26/2009
11/27/2009
11/28/2009
11/29/2009
11/30/2009
12/1/2009
12/2/2009
12/3/2009
12/4/2009
12/5/2009
12/6/2009
12/7/2009
12/8/2009
12/9/2009
12/10/2009
12/11/2009
12/12/2009
12/13/2009
12/14/2009
12/15/2009
12/16/2009
12/17/2009
12/18/2009
12/19/2009
12/20/2009
12/21/2009
12/22/2009
12/23/2009
12/24/2009
12/25/2009
12/26/2009
12/27/2009
12/28/2009
12/29/2009
12/30/2009
12/31/2009
1/1/2010
1/2/2010
1/3/2010
1/4/2010
1/5/2010
1/6/2010
1/7/2010
1/8/2010
1/9/2010
1/10/2010
1/11/2010
1/12/2010
1/13/2010
1/14/2010
1/15/2010
1/16/2010
1/17/2010
1/18/2010
1/19/2010
1/20/2010
1/21/2010
1/22/2010
1/23/2010
1/24/2010
1/25/2010
1/26/2010
1/27/2010
1/28/2010
1/29/2010
1/30/2010
1/31/2010
2/1/2010
2/2/2010
2/3/2010
2/4/2010
2/5/2010
2/6/2010
2/7/2010
2/8/2010
2/9/2010
2/10/2010
2/11/2010
2/12/2010
2/13/2010
2/14/2010
2/15/2010
2/16/2010
2/17/2010
2/18/2010
2/19/2010
2/20/2010
2/21/2010
2/22/2010
2/23/2010
2/24/2010
2/25/2010
2/26/2010
2/27/2010
2/28/2010
3/1/2010	0.025
3/2/2010	0.025
3/3/2010	0.026
3/4/2010	0.026
3/5/2010	0.026
3/6/2010	0.028
3/7/2010	0.028
3/8/2010	0.028
3/9/2010	0.045
3/10/2010	0.132
3/11/2010	0.302
3/12/2010	0.468
3/13/2010	0.544
3/14/2010	0.687
3/15/2010	0.393
3/16/2010	0.285
3/17/2010	0.286
3/18/2010	0.28
3/19/2010	0.26
3/20/2010	0.2
3/21/2010	0.18
3/22/2010	0.27
3/23/2010	0.321
3/24/2010	0.308
3/25/2010	0.364
3/26/2010	0.332
3/27/2010	0.341
3/28/2010	0.446
3/29/2010	0.626
3/30/2010	0.971
3/31/2010	1.06
4/1/2010	0.882
4/2/2010	0.703
4/3/2010	0.86
4/4/2010	0.744
4/5/2010	0.637
4/6/2010	0.51
4/7/2010	0.401
4/8/2010	0.351
4/9/2010	0.335
4/10/2010	0.33
4/11/2010	0.296
4/12/2010	0.295
4/13/2010	0.284
4/14/2010	0.279
4/15/2010	0.264
4/16/2010	0.226
4/17/2010	0.21
4/18/2010	0.176
4/19/2010	0.159
4/20/2010	0.132
4/21/2010	0.142
4/22/2010	0.126
4/23/2010	0.117
4/24/2010	0.113
4/25/2010	0.074
4/26/2010	0.086
4/27/2010	0.062
4/28/2010	0.048
4/29/2010	0.071
4/30/2010	0.086
5/1/2010	0.086
5/2/2010	0.087
5/3/2010	0.073
5/4/2010	0.102
5/5/2010	0.204
5/6/2010	0.2
5/7/2010	0.412
5/8/2010	0.356
5/9/2010	0.364
5/10/2010	0.337
5/11/2010	0.291
5/12/2010	0.259
5/13/2010	0.253
5/14/2010	0.238
5/15/2010	0.224
5/16/2010	0.232
5/17/2010	0.223
5/18/2010	0.231
5/19/2010	0.205
5/20/2010	0.178
5/21/2010	0.205
5/22/2010	0.272
5/23/2010	0.339
5/24/2010	0.261
5/25/2010	0.372
5/26/2010	0.309
5/27/2010	0.282
5/28/2010	0.365
5/29/2010	3.52
5/30/2010	9.49	9.49
5/31/2010		10.6
6/1/2010		10.7
6/2/2010		10.5
6/3/2010		10
6/4/2010		9.29
6/5/2010		8.4
6/6/2010	6.98	6.98
6/7/2010	4.88
6/8/2010	2.91
6/9/2010	2.11
6/10/2010	1.34
6/11/2010	1
6/12/2010	0.783
6/13/2010	0.563
6/14/2010	0.409
6/15/2010	0.321
6/16/2010	0.273
6/17/2010	0.268
6/18/2010	0.407
6/19/2010	0.338
6/20/2010	0.251
6/21/2010	0.22
[truncated: 1,228 more rows]
