# Supplementary material for: Simulating cold-region hydrology in an intensively drained agricultural watershed in Manitoba, Canada, using the Cold Regions Hydrological Model
Source: Copernicus journal article supplement (doi:10.5194/hess-2016-462), 2016-09-27
Supplement: Supplementary file 5 [file Cordeiro2016_PlotDataFig04.xlsx]

## Sheet: Sheet1
	Discharge (m^3/s)
Date	Observed	Backwater	Simulated	WSC manual readings
1992-01-01
1992-01-02
1992-01-03
1992-01-04
1992-01-05
1992-01-06
1992-01-07
1992-01-08
1992-01-09
1992-01-10
1992-01-11
1992-01-12
1992-01-13
1992-01-14
1992-01-15
1992-01-16
1992-01-17
1992-01-18
1992-01-19
1992-01-20
1992-01-21
1992-01-22
1992-01-23
1992-01-24
1992-01-25
1992-01-26
1992-01-27
1992-01-28
1992-01-29
1992-01-30
1992-01-31
1992-02-01
1992-02-02
1992-02-03
1992-02-04
1992-02-05
1992-02-06
1992-02-07
1992-02-08
1992-02-09
1992-02-10
1992-02-11
1992-02-12
1992-02-13
1992-02-14
1992-02-15
1992-02-16
1992-02-17
1992-02-18
1992-02-19
1992-02-20
1992-02-21
1992-02-22
1992-02-23
1992-02-24
1992-02-25
1992-02-26
1992-02-27
1992-02-28
1992-02-29
1992-03-01	0.146		0.05
1992-03-02	0.147		0.05
1992-03-03	0.147		0.07
1992-03-04	0.148		0.09
1992-03-05	0.149		0.11
1992-03-06	0.15		0.12
1992-03-07	0.151		0.12
1992-03-08	0.15		0.11
1992-03-09	0.149		0.11
1992-03-10	0.149		0.1
1992-03-11	0.149		0.1
1992-03-12	0.148		0.09
1992-03-13	0.148		0.09
1992-03-14	0.148		0.08
1992-03-15	0.148		0.08
1992-03-16	0.147		0.07
1992-03-17	0.147		0.07
1992-03-18	0.147		0.07
1992-03-19	0.146		0.07
1992-03-20	0.146		0.07
1992-03-21	0.145		0.07
1992-03-22	0.145		0.07
1992-03-23	0.146		0.07
1992-03-24	0.146		0.08
1992-03-25	0.15		0.2
1992-03-26	0.155		0.45
1992-03-27	0.221		0.54
1992-03-28	0.372		0.56
1992-03-29	0.484		0.54
1992-03-30	1.47		0.56
1992-03-31	1.67		0.67
1992-04-01	1.89		0.74
1992-04-02	2.23		0.72
1992-04-03	2.43		0.68
1992-04-04	2.56		0.61
1992-04-05	2.66		0.68
1992-04-06	3.28		1
1992-04-07	4.57		1.87
1992-04-08	5.95		3.55
1992-04-09	6.66		5.45
1992-04-10	6.4		6.59
1992-04-11	5.03		6.57
1992-04-12	3.9		5.95
1992-04-13	3.04		5.16
1992-04-14	2.24		4.38
1992-04-15	1.33		3.66
1992-04-16	1.14		3.03
1992-04-17	1.13		2.49
1992-04-18	1.02		2.03
1992-04-19	1.37		1.66
1992-04-20	1.48		1.38
1992-04-21	1.35		1.15
1992-04-22	1.11		0.94
1992-04-23	1.03		0.77
1992-04-24	0.92		0.64
1992-04-25	0.787		0.53
1992-04-26	0.678		0.44
1992-04-27	0.591		0.37
1992-04-28	0.641		0.32
1992-04-29	0.605		0.28
1992-04-30	0.548		0.29
1992-05-01	0.554		0.32
1992-05-02	0.517		0.36
1992-05-03	0.459		0.4
1992-05-04	0.428		0.42
1992-05-05	0.403		0.41
1992-05-06	0.374		0.42
1992-05-07	0.331		0.43
1992-05-08	0.298		0.46
1992-05-09	0.272		0.46
1992-05-10	0.279		0.41
1992-05-11	0.251		0.37
1992-05-12	0.216		0.4
1992-05-13	0.174		0.45
1992-05-14	0.168		0.48
1992-05-15	0.154		0.47
1992-05-16	0.151		0.42
1992-05-17	0.145		0.36
1992-05-18	0.131		0.35
1992-05-19	0.138		0.38
1992-05-20	0.116		0.42
1992-05-21	0.121		0.48
1992-05-22	0.106		0.54
1992-05-23	0.069		0.57
1992-05-24	0.059		0.55
1992-05-25	0.065		0.51
1992-05-26	0.119		0.47
1992-05-27	0.309		0.44
1992-05-28	0.318		0.41
1992-05-29	0.328		0.38
1992-05-30	0.284		0.36
1992-05-31	0.249		0.34
1992-06-01	0.213		0.31
1992-06-02	0.143		0.28
1992-06-03	0.087		0.24
1992-06-04	0.141		0.21
1992-06-05	0.339		0.42
1992-06-06	0.426		0.48
1992-06-07	0.372		0.47
1992-06-08	0.306		0.43
1992-06-09	0.279		0.38
1992-06-10	0.4		0.32
1992-06-11	0.459		0.27
1992-06-12	0.414		0.23
1992-06-13	0.369		0.19
1992-06-14	0.323		0.16
1992-06-15	0.267		0.14
1992-06-16	0.245		0.12
1992-06-17	0.288		0.1
1992-06-18	0.384		0.1
1992-06-19	0.422		0.2
1992-06-20	0.402		0.23
1992-06-21	0.373		0.22
1992-06-22	0.339		0.2
1992-06-23	0.315		0.18
1992-06-24	0.336		0.15
1992-06-25	0.396		0.17
1992-06-26	0.404		0.29
1992-06-27	0.407		0.31
1992-06-28	0.422		0.29
1992-06-29	0.41		0.25
1992-06-30	0.414		0.22
1992-07-01	0.417		0.18
1992-07-02	0.406		0.16
1992-07-03	0.427		0.18
1992-07-04	0.426		0.32
1992-07-05	0.408		0.38
1992-07-06	0.41		0.37
1992-07-07	0.419		0.33
1992-07-08	0.423		0.28
1992-07-09	0.427		0.24
1992-07-10	0.427		0.2
1992-07-11	0.428		0.17
1992-07-12	0.425		0.14
1992-07-13	0.424		0.12
1992-07-14	0.438		0.1
1992-07-15	0.457		0.1
1992-07-16	0.461		0.19
1992-07-17	0.463		0.21
1992-07-18	0.468		0.19
1992-07-19	0.497		0.2
1992-07-20	0.487		0.21
1992-07-21	0.481		0.2
1992-07-22	0.457		0.17
1992-07-23	0.439		0.15
1992-07-24	0.436		0.12
1992-07-25	0.44		0.1
1992-07-26	0.461		0.08
1992-07-27	0.476		0.1
1992-07-28	0.492		0.12
1992-07-29	0.476		0.12
1992-07-30	0.463		0.11
1992-07-31	0.462		0.09
1992-08-01	0.472		0.08
1992-08-02	0.461		0.09
1992-08-03	0.463		0.09
1992-08-04	0.455		0.08
1992-08-05	0.436		0.07
1992-08-06	0.417		0.06
1992-08-07	0.406		0.05
1992-08-08	0.385		0.04
1992-08-09	0.37		0.04
1992-08-10	0.343		0.03
1992-08-11	0.316		0.03
1992-08-12	0.269		0.03
1992-08-13	0.265		0.03
1992-08-14	0.257		0.03
1992-08-15	0.272		0.02
1992-08-16	0.276		0.02
1992-08-17	0.257		0.02
1992-08-18	0.231		0.02
1992-08-19	0.204		0.02
1992-08-20	0.153		0.02
1992-08-21	0.124		0.02
1992-08-22	0.09		0.03
1992-08-23	0.067		0.04
1992-08-24	0.065		0.11
1992-08-25	0.228		0.16
1992-08-26	0.247		0.17
1992-08-27	0.185		0.16
1992-08-28	0.135		0.14
1992-08-29	0.207		0.12
1992-08-30	0.346		0.11
1992-08-31	0.244		0.16
1992-09-01	0.208		0.17
1992-09-02	0.246		0.16
1992-09-03	0.227		0.15
1992-09-04	0.151		0.14
1992-09-05	0.149		0.12
1992-09-06	0.126		0.11
1992-09-07	0.238		0.09
1992-09-08	0.246		0.08
1992-09-09	0.247		0.09
1992-09-10	0.206		0.18
1992-09-11	0.285		0.24
1992-09-12	0.478		0.25
1992-09-13	0.499		0.24
1992-09-14	0.484		0.21
1992-09-15	0.432		0.19
1992-09-16	0.384		0.17
1992-09-17	0.413		0.19
1992-09-18	0.504		0.21
1992-09-19	0.481		0.23
1992-09-20	0.384		0.22
1992-09-21	0.358		0.2
1992-09-22	0.509		0.18
1992-09-23	0.565		0.16
1992-09-24	0.573		0.14
1992-09-25	0.608		0.12
1992-09-26	0.483		0.1
1992-09-27	0.423		0.09
1992-09-28	0.422		0.09
1992-09-29	0.453		0.1
1992-09-30	0.535		0.1
1992-10-01	0.56		0.1
1992-10-02	0.562		0.09
1992-10-03	0.563		0.09
1992-10-04	0.55		0.08
1992-10-05	0.483		0.07
1992-10-06	0.4		0.07
1992-10-07	0.322		0.07
1992-10-08	0.26		0.07
1992-10-09	0.33		0.06
1992-10-10	0.345		0.06
1992-10-11	0.343		0.06
1992-10-12	0.385		0.06
1992-10-13	0.373		0.06
1992-10-14	0.349		0.06
1992-10-15	0.36		0.06
1992-10-16	0.386		0.06
1992-10-17	0.403		0.06
1992-10-18	0.386		0.06
1992-10-19	0.36		0.06
1992-10-20	0.356		0.06
1992-10-21	0.319		0.06
1992-10-22	0.288		0.06
1992-10-23	0.271		0.06
1992-10-24	0.317		0.06
1992-10-25	0.323		0.06
1992-10-26	0.292		0.06
1992-10-27	0.359		0.06
1992-10-28	0.471		0.06
1992-10-29	0.491		0.06
1992-10-30	0.477		0.06
1992-10-31	0.46		0.06
1992-11-01
1992-11-02
1992-11-03
1992-11-04
1992-11-05
1992-11-06
1992-11-07
1992-11-08
1992-11-09
1992-11-10
1992-11-11
1992-11-12
1992-11-13
1992-11-14
1992-11-15
1992-11-16
1992-11-17
1992-11-18
1992-11-19
1992-11-20
1992-11-21
1992-11-22
1992-11-23
1992-11-24
1992-11-25
1992-11-26
1992-11-27
1992-11-28
1992-11-29
1992-11-30
1992-12-01
1992-12-02
1992-12-03
1992-12-04
1992-12-05
1992-12-06
1992-12-07
1992-12-08
1992-12-09
1992-12-10
1992-12-11
1992-12-12
1992-12-13
1992-12-14
1992-12-15
1992-12-16
1992-12-17
1992-12-18
1992-12-19
1992-12-20
1992-12-21
1992-12-22
1992-12-23
1992-12-24
1992-12-25
1992-12-26
1992-12-27
1992-12-28
1992-12-29
1992-12-30
1992-12-31
1993-01-01
1993-01-02
1993-01-03
1993-01-04
1993-01-05
1993-01-06
1993-01-07
1993-01-08
1993-01-09
1993-01-10
1993-01-11
1993-01-12
1993-01-13
1993-01-14
1993-01-15
1993-01-16
1993-01-17
1993-01-18
1993-01-19
1993-01-20
1993-01-21
1993-01-22
1993-01-23
1993-01-24
1993-01-25
1993-01-26
1993-01-27
1993-01-28
1993-01-29
1993-01-30
1993-01-31
1993-02-01
1993-02-02
1993-02-03
1993-02-04
1993-02-05
1993-02-06
1993-02-07
1993-02-08
1993-02-09
1993-02-10
1993-02-11
1993-02-12
1993-02-13
1993-02-14
1993-02-15
1993-02-16
1993-02-17
1993-02-18
1993-02-19
1993-02-20
1993-02-21
1993-02-22
1993-02-23
1993-02-24
1993-02-25
1993-02-26
1993-02-27
1993-02-28
1993-03-01	0.055		0.04
1993-03-02	0.054		0.04
1993-03-03	0.054		0.05
1993-03-04	0.053		0.17
1993-03-05	0.052		0.34
1993-03-06	0.05		0.48
1993-03-07	0.049		0.75
1993-03-08	0.047		1.25
1993-03-09	0.045		2
1993-03-10	0.043		2.86
1993-03-11	0.042		3.46
1993-03-12	0.042		3.4
1993-03-13	0.041		3.1
1993-03-14	0.041		2.73
1993-03-15	0.04		2.37
1993-03-16	0.039		2.05
1993-03-17	0.039		1.76
1993-03-18	0.038		1.52
1993-03-19	0.038		1.32
1993-03-20	0.037		1.15
1993-03-21	0.037		1
1993-03-22	0.036		0.89
1993-03-23	0.035		0.79
1993-03-24	0.043		0.69
1993-03-25	0.052		0.75
1993-03-26	0.063		2.24
1993-03-27	0.077		4.49
1993-03-28	0.112		5.09
1993-03-29	0.154		4.84
1993-03-30	0.72		4.3
1993-03-31	2.19		3.72
1993-04-01	2.41		3.17
1993-04-02	2.9		2.67
1993-04-03	3.58		2.21
1993-04-04	4.5		1.8
1993-04-05	4.3		1.46
1993-04-06	5.1		1.18
1993-04-07	5.6		0.96
1993-04-08	4.45		0.78
1993-04-09	2.44		0.65
1993-04-10	1.56		0.55
1993-04-11	1.31		0.47
1993-04-12	1.36		0.4
1993-04-13	1.29		0.35
1993-04-14	1.25		0.32
1993-04-15	0.923		0.3
1993-04-16	0.73		0.29
1993-04-17	0.602		0.3
1993-04-18	0.528		0.3
1993-04-19	0.46		0.31
1993-04-20	0.423		0.31
1993-04-21	0.414		0.31
1993-04-22	0.387		0.3
1993-04-23	0.353		0.3
1993-04-24	0.345		0.3
1993-04-25	0.282		0.31
1993-04-26	0.242		0.32
1993-04-27	0.375		0.3
1993-04-28	0.607		0.35
1993-04-29	0.616		0.38
1993-04-30	0.596		0.4
1993-05-01	0.552		0.41
1993-05-02	0.533		0.4
1993-05-03	0.477		0.38
1993-05-04	0.393		0.37
1993-05-05	0.351		0.37
1993-05-06	0.291		0.37
1993-05-07	0.268		0.39
1993-05-08	0.3		0.39
1993-05-09	0.503		0.59
1993-05-10	0.591		0.94
1993-05-11	0.573		1.06
1993-05-12	0.597		1.06
1993-05-13	0.499		1.01
1993-05-14	0.426		0.95
1993-05-15	0.469		0.89
1993-05-16	0.608		0.82
1993-05-17	0.509		0.73
1993-05-18	0.378		0.65
1993-05-19	0.309		0.59
1993-05-20	0.271		0.54
1993-05-21	0.213		0.49
1993-05-22	0.314		0.46
1993-05-23	0.397		0.45
1993-05-24	0.317		0.45
1993-05-25	0.246		0.46
1993-05-26	0.181		0.45
1993-05-27	0.147		0.44
1993-05-28	0.217		0.42
1993-05-29	0.386		0.4
1993-05-30	0.403		0.39
1993-05-31	0.403		0.38
1993-06-01	0.481		0.35
1993-06-02	0.509		0.33
1993-06-03	0.509		0.31
1993-06-04	0.458		0.3
1993-06-05	0.38		0.29
1993-06-06	0.319		0.28
1993-06-07	0.324		0.26
1993-06-08	0.365		0.37
1993-06-09	0.329		0.53
1993-06-10	0.405		0.56
1993-06-11	0.532		0.53
1993-06-12	0.445		0.46
1993-06-13	0.383		0.49
1993-06-14	0.35		0.49
1993-06-15	0.286		0.43
1993-06-16	0.241		0.38
1993-06-17	0.209		0.34
1993-06-18	0.342		0.3
1993-06-19	0.345		0.26
1993-06-20	0.308		0.21
1993-06-21	0.429		0.22
1993-06-22	0.374		0.25
1993-06-23	0.301		0.24
1993-06-24	0.215		0.22
1993-06-25	0.225		0.19
1993-06-26	0.298		0.17
1993-06-27	0.307		0.15
1993-06-28	0.317		0.15
1993-06-29	0.362		0.13
1993-06-30	0.376		0.13
1993-07-01	0.322		0.12
1993-07-02	0.331		0.58
1993-07-03	0.335		0.89
1993-07-04	0.378		1.22
1993-07-05	0.442		1.23
1993-07-06	0.539		1.75
1993-07-07	0.554		2.01
1993-07-08	0.5		1.9
1993-07-09	0.508		1.67
1993-07-10	0.568		1.41
1993-07-11	0.53		1.17
1993-07-12	0.446		0.96
1993-07-13	0.362		0.78
1993-07-14	0.325		0.63
1993-07-15	0.403		0.51
1993-07-16	0.487		0.4
1993-07-17	0.503		0.4
1993-07-18	0.408		0.38
1993-07-19	0.371		0.43
1993-07-20	0.346		0.49
1993-07-21	0.323		0.46
1993-07-22	0.394		0.41
1993-07-23	0.465		0.35
1993-07-24	0.509		0.3
1993-07-25	0.523		0.23
1993-07-26	0.584		0.55
1993-07-27	0.396		0.67
1993-07-28	0.713		0.84
1993-07-29	0.595		0.9
1993-07-30	0.497		0.83
1993-07-31	0.483		0.72
1993-08-01	0.459		0.61
1993-08-02	0.424		0.5
1993-08-03	0.379		0.42
1993-08-04	0.349		0.35
1993-08-05	0.352		0.29
1993-08-06	0.426		0.24
1993-08-07	0.483		0.2
1993-08-08	0.822		0.12
1993-08-09	4.78		1.02
1993-08-10	3.5		1.79
1993-08-11	2.41		1.87
1993-08-12	2.16		1.73
1993-08-13	2.02		1.54
1993-08-14	1.9		1.31
1993-08-15	1.81		1.12
1993-08-16	1.73		1.19
1993-08-17	1.58		1.09
1993-08-18	1.42		0.95
1993-08-19	1.18		0.87
1993-08-20	0.972		0.75
1993-08-21	0.789		0.63
1993-08-22	0.666		0.52
1993-08-23	0.578		0.42
1993-08-24	0.497		0.35
1993-08-25	0.41		0.29
1993-08-26	0.318		0.24
1993-08-27	0.272		0.21
1993-08-28	0.283		0.18
1993-08-29	0.498		0.16
1993-08-30	0.589		0.14
1993-08-31	0.535		0.13
1993-09-01	0.464		0.12
1993-09-02	0.412		0.11
1993-09-03	0.334		0.1
1993-09-04	0.313		0.1
1993-09-05	0.3		0.09
1993-09-06	0.291		0.09
1993-09-07	0.331		0.09
1993-09-08	0.525		0.08
1993-09-09	0.512		0.08
1993-09-10	0.551		0.12
1993-09-11	0.549		0.13
1993-09-12	0.495		0.12
1993-09-13	0.389		0.12
1993-09-14	0.321		0.12
1993-09-15	0.269		0.12
1993-09-16	0.294		0.11
1993-09-17	0.331		0.11
1993-09-18	0.308		0.1
1993-09-19	0.266		0.09
1993-09-20	0.262		0.09
1993-09-21	0.288		0.08
1993-09-22	0.3		0.08
1993-09-23	0.292		0.08
1993-09-24	0.241		0.08
1993-09-25	0.25		0.08
1993-09-26	0.279		0.08
1993-09-27	0.313		0.08
1993-09-28	0.351		0.08
1993-09-29	0.276		0.08
1993-09-30	0.256		0.08
1993-10-01	0.258		0.07
1993-10-02	0.263		0.07
1993-10-03	0.293		0.07
1993-10-04	0.283		0.07
1993-10-05	0.259		0.07
1993-10-06	0.265		0.07
1993-10-07	0.27		0.08
1993-10-08	0.288		0.08
1993-10-09	0.248		0.07
1993-10-10	0.229		0.08
1993-10-11	0.293		0.08
1993-10-12	0.288		0.08
1993-10-13	0.248		0.08
1993-10-14	0.21		0.08
1993-10-15	0.215		0.08
1993-10-16	0.32		0.08
1993-10-17	0.336		0.08
1993-10-18	0.355		0.08
1993-10-19	0.352		0.07
1993-10-20	0.32		0.07
1993-10-21	0.293		0.08
1993-10-22	0.272		0.08
1993-10-23	0.255		0.07
1993-10-24	0.258		0.07
1993-10-25	0.271		0.07
1993-10-26	0.277		0.08
1993-10-27	0.274		0.07
1993-10-28	0.277		0.08
1993-10-29	0.275		0.1
1993-10-30	0.271		0.11
1993-10-31	0.255		0.11
1993-11-01
1993-11-02
1993-11-03
1993-11-04
1993-11-05
1993-11-06
1993-11-07
1993-11-08
1993-11-09
1993-11-10
1993-11-11
1993-11-12
1993-11-13
1993-11-14
1993-11-15
1993-11-16
1993-11-17
1993-11-18
1993-11-19
1993-11-20
1993-11-21
1993-11-22
1993-11-23
1993-11-24
1993-11-25
1993-11-26
1993-11-27
1993-11-28
1993-11-29
1993-11-30
1993-12-01
1993-12-02
1993-12-03
1993-12-04
1993-12-05
1993-12-06
1993-12-07
1993-12-08
1993-12-09
1993-12-10
1993-12-11
1993-12-12
1993-12-13
1993-12-14
1993-12-15
1993-12-16
1993-12-17
1993-12-18
1993-12-19
1993-12-20
1993-12-21
1993-12-22
1993-12-23
1993-12-24
1993-12-25
1993-12-26
1993-12-27
1993-12-28
1993-12-29
1993-12-30
1993-12-31
1994-01-01
1994-01-02
1994-01-03
1994-01-04
1994-01-05
1994-01-06
1994-01-07
1994-01-08
1994-01-09
1994-01-10
1994-01-11
1994-01-12
1994-01-13
1994-01-14
1994-01-15
1994-01-16
1994-01-17
1994-01-18
1994-01-19
1994-01-20
1994-01-21
1994-01-22
1994-01-23
1994-01-24
1994-01-25
1994-01-26
1994-01-27
1994-01-28
1994-01-29
1994-01-30
1994-01-31
1994-02-01
1994-02-02
1994-02-03
1994-02-04
1994-02-05
1994-02-06
1994-02-07
1994-02-08
1994-02-09
1994-02-10
1994-02-11
1994-02-12
1994-02-13
1994-02-14
1994-02-15
1994-02-16
1994-02-17
1994-02-18
1994-02-19
1994-02-20
1994-02-21
1994-02-22
1994-02-23
1994-02-24
1994-02-25
1994-02-26
1994-02-27
1994-02-28
1994-03-01	0.056		0.03
1994-03-02	0.057		0.03	0.057
1994-03-03	0.058		0.03
1994-03-04	0.062		0.03
1994-03-05	0.066		0.03
1994-03-06	0.07		0.09
1994-03-07	0.066		0.56
1994-03-08	0.062		1.54
1994-03-09	0.06		2.2
1994-03-10	0.058		2.29
1994-03-11	0.058		2.15
1994-03-12	0.058		1.93
1994-03-13	0.058		1.78
1994-03-14	0.062		1.81
1994-03-15	0.066		1.79
1994-03-16	0.07		1.61
1994-03-17	0.074		1.39
1994-03-18	0.1		1.16
1994-03-19	0.2		0.96
1994-03-20	0.3		0.8
1994-03-21	0.4		0.65
1994-03-22	0.511		0.53	0.511
1994-03-23	0.4		0.44
1994-03-24	0.3		0.35
1994-03-25	0.25		0.29
1994-03-26	0.24		0.25
1994-03-27	0.23		0.21
1994-03-28	0.225		0.19
1994-03-29	0.221		0.17	0.221
1994-03-30	0.23		0.15
1994-03-31	0.25		0.14
1994-04-01	0.26		0.13
1994-04-02	0.25		0.14
1994-04-03	0.24		0.14
1994-04-04	0.22		0.13
1994-04-05	0.2		0.12
1994-04-06	0.198		0.11
1994-04-07	0.195		0.12	0.219
1994-04-08	0.217		0.12
1994-04-09	0.41		0.12
1994-04-10	0.749		0.13
1994-04-11	0.697		0.15
1994-04-12	0.464		0.17
1994-04-13	0.336		0.19	0.293
1994-04-14	0.19		0.22
1994-04-15	0.164		0.24
1994-04-16	0.171		0.24
1994-04-17	0.128		0.24
1994-04-18	0.121		0.23
1994-04-19	0.11		0.24
1994-04-20	0.099		0.25	0.102
1994-04-21	0.078		0.25
1994-04-22	0.052		0.25
1994-04-23	0.106		0.25
1994-04-24	0.058		0.24
1994-04-25	0.024		0.24
1994-04-26	0.01		0.24
1994-04-27	0.004		0.23
1994-04-28	0.004		0.21
1994-04-29	0.01		0.2
1994-04-30	0.071		0.18
1994-05-01	0.025		0.17
1994-05-02	0.069		0.16
1994-05-03	0.121		0.15
1994-05-04	0.121		0.14
1994-05-05	0.311		0.13
1994-05-06	0.258		0.13
1994-05-07	0.184		0.12
1994-05-08	0.122		0.11
1994-05-09	0.042		0.1
1994-05-10	0.027		0.1
1994-05-11	0.033		0.09
1994-05-12	0.02		0.09
1994-05-13	0.011		0.09
1994-05-14	0.038		0.09
1994-05-15	0.028		0.08
1994-05-16	0.038		0.08
1994-05-17	0.029		0.08
1994-05-18	0.042		0.08
1994-05-19	0.142		0.07
1994-05-20	0.154		0.08
1994-05-21	0.164		0.13
1994-05-22	0.143		0.18
1994-05-23	0.164		0.19
1994-05-24	0.24		0.19
1994-05-25	0.188		0.18
1994-05-26	0.119		0.17
1994-05-27	0.086		0.15
1994-05-28	0.147		0.13
1994-05-29	0.147		0.12
1994-05-30	0.097		0.11	0.106
1994-05-31	0.076		0.1
1994-06-01	0.054		0.09
1994-06-02	0.025		0.08
1994-06-03	0.006		0.07
1994-06-04	0.004		0.07
1994-06-05	0.002		0.06
1994-06-06	0.001		0.06
1994-06-07	0.001		0.06
1994-06-08	0.026		0.05
1994-06-09	0.248		0.05
1994-06-10	0.24		0.04
1994-06-11	0.228		0.07
1994-06-12	0.202		0.11
1994-06-13	0.19		0.12
1994-06-14	0.22		0.11
1994-06-15	0.249		0.12
1994-06-16	0.246		0.12
1994-06-17	0.23		0.11
1994-06-18	0.201		0.1
1994-06-19	0.179		0.09
1994-06-20	0.147		0.08
1994-06-21	0.112		0.07
1994-06-22	0.086		0.07
1994-06-23	0.155		0.06
1994-06-24	0.172		0.05
1994-06-25	0.169		0.04
1994-06-26	0.141		0.04
1994-06-27	0.118		0.04
1994-06-28	0.113		0.05
1994-06-29	0.08		0.11
1994-06-30	0.082		0.15
1994-07-01	0.095		0.18
1994-07-02	0.113		0.18
1994-07-03	0.16		0.12
1994-07-04	0.198		0.38
1994-07-05	0.146		0.6
1994-07-06	0.117		0.61	0.131
1994-07-07	0.091		0.56
1994-07-08	0.064		0.48
1994-07-09	0.076		0.41
1994-07-10	0.106		0.3
1994-07-11	0.153		0.77
1994-07-12	0.128		1.98
1994-07-13	0.107		2.21
1994-07-14	0.131		2.08
1994-07-15	0.171		1.83
1994-07-16	0.182		1.62
1994-07-17	0.172		1.38
1994-07-18	0.162		1.16
1994-07-19	0.135		0.95
1994-07-20	0.118		0.77
1994-07-21	0.152		0.63
1994-07-22	0.206		0.51
1994-07-23	0.234		0.41
1994-07-24	0.241		0.33
1994-07-25	0.234		0.26
1994-07-26	0.233		0.21
1994-07-27	0.248		0.16
1994-07-28	0.239		0.13
1994-07-29	0.224		0.1
1994-07-30	0.224		0.08
1994-07-31	0.215		0.15
1994-08-01	0.187		0.17
1994-08-02	0.14		0.16
1994-08-03	0.107		0.15
1994-08-04	0.162		0.13
1994-08-05	0.237		0.11
1994-08-06	0.331		0.08
1994-08-07	0.279		0.11
1994-08-08	0.182		0.17
1994-08-09	0.148		0.18
1994-08-10	0.176		0.17
1994-08-11	0.198		0.15
1994-08-12	0.245		0.15
1994-08-13	0.237		0.44
1994-08-14	0.196		0.53
1994-08-15	0.146		0.51
1994-08-16	0.104		0.45
1994-08-17	0.048		0.38
1994-08-18	0.031		0.32
1994-08-19	0.073		0.27
1994-08-20	0.046		0.23
1994-08-21	0.034		0.19
1994-08-22	0.161		0.15
1994-08-23	0.288		0.13
1994-08-24	0.254		0.1
1994-08-25	0.193		0.09
1994-08-26	0.127		0.07
1994-08-27	0.131		0.06
1994-08-28	0.137		0.09
1994-08-29	0.147		0.12	0.148
1994-08-30	0.124		0.13
1994-08-31	0.056		0.12
1994-09-01	0.056		0.11
1994-09-02	0.006		0.1
1994-09-03	0.001		0.08
1994-09-04	0.109		0.14
1994-09-05	0.2		0.19
1994-09-06	0.17		0.2
1994-09-07	0.23		0.18
1994-09-08	0.172		0.16
1994-09-09	0.144		0.14
1994-09-10	0.147		0.12
1994-09-11	0.141		0.1
1994-09-12	0.097		0.09
1994-09-13	0.05		0.08
1994-09-14	0.092		0.07
1994-09-15	0.114		0.06
1994-09-16	0.13		0.06
1994-09-17	0.168		0.06
1994-09-18	0.166		0.05
1994-09-19	0.094		0.05
1994-09-20	0.055		0.04
1994-09-21	0.022		0.05
1994-09-22	0.001		0.14
1994-09-23	0.01		0.19
1994-09-24	0.055		0.2
1994-09-25	0.044		0.19
1994-09-26	0.048		0.17
1994-09-27	0.056		0.15
1994-09-28	0.099		0.13
1994-09-29	0.127		0.11	0.153
1994-09-30	0.039		0.1
1994-10-01	0.015		0.09
1994-10-02	0.018		0.08
1994-10-03	0.024		0.07
1994-10-04	0.067		0.07
1994-10-05	0.079		0.06
1994-10-06	0.096		0.05
1994-10-07	0.295		0.12
1994-10-08	0.173		0.26
1994-10-09	0.116		0.29
1994-10-10	0.084		0.27
1994-10-11	0.082		0.25
1994-10-12	0.094		0.22
1994-10-13	0.099		0.19
1994-10-14	0.065		0.17
1994-10-15	0.053		0.15
1994-10-16	0.056		0.14
1994-10-17	0.163		0.13
1994-10-18	0.324		0.16
1994-10-19	0.653		0.19
1994-10-20	0.622		0.21
1994-10-21	0.511		0.2
1994-10-22	0.525		0.19
1994-10-23	0.531		0.18
1994-10-24	0.487		0.18
1994-10-25	0.428		0.17
1994-10-26	0.379		0.17
1994-10-27	0.364		0.16
1994-10-28	0.311		0.16	0.317
1994-10-29	0.305		0.15
1994-10-30	0.3		0.15
1994-10-31	0.295		0.15
1994-11-01
1994-11-02
1994-11-03
1994-11-04
1994-11-05
1994-11-06
1994-11-07
1994-11-08
1994-11-09
1994-11-10
1994-11-11
1994-11-12
1994-11-13
1994-11-14
1994-11-15
1994-11-16
1994-11-17
1994-11-18
1994-11-19
1994-11-20
1994-11-21
1994-11-22
1994-11-23
1994-11-24
1994-11-25
1994-11-26
1994-11-27
1994-11-28
1994-11-29
1994-11-30
1994-12-01
1994-12-02
1994-12-03
1994-12-04
1994-12-05
1994-12-06
1994-12-07
1994-12-08
1994-12-09
1994-12-10
1994-12-11
1994-12-12
1994-12-13
1994-12-14
1994-12-15
1994-12-16
1994-12-17
1994-12-18
1994-12-19
1994-12-20
1994-12-21
1994-12-22
1994-12-23
1994-12-24
1994-12-25
1994-12-26
1994-12-27
1994-12-28
1994-12-29
1994-12-30
1994-12-31
1995-01-01
1995-01-02
1995-01-03
1995-01-04
1995-01-05
1995-01-06
1995-01-07
1995-01-08
1995-01-09
1995-01-10
1995-01-11
1995-01-12
1995-01-13
1995-01-14
1995-01-15
1995-01-16
1995-01-17
1995-01-18
1995-01-19
1995-01-20
1995-01-21
1995-01-22
1995-01-23
1995-01-24
1995-01-25
1995-01-26
1995-01-27
1995-01-28
1995-01-29
1995-01-30
1995-01-31
1995-02-01
1995-02-02
1995-02-03
1995-02-04
1995-02-05
1995-02-06
1995-02-07
1995-02-08
1995-02-09
1995-02-10
1995-02-11
1995-02-12
1995-02-13
1995-02-14
1995-02-15
1995-02-16
1995-02-17
1995-02-18
1995-02-19
1995-02-20
1995-02-21
1995-02-22
1995-02-23
1995-02-24
1995-02-25
1995-02-26
1995-02-27
1995-02-28
1995-03-01	0.128		0.04
1995-03-02	0.128		0.04
1995-03-03	0.128		0.04
1995-03-04	0.128		0.04
1995-03-05	0.129		0.04
1995-03-06	0.129		0.04
1995-03-07	0.129		0.04
1995-03-08	0.129		0.04
1995-03-09	0.13		0.04
1995-03-10	0.13		0.04
1995-03-11	0.13		0.04
1995-03-12	0.14		0.04
1995-03-13	0.161		0.04
1995-03-14	0.174		0.03
1995-03-15	0.186		0.1
1995-03-16	0.199		0.31
1995-03-17	0.212		0.42
1995-03-18	0.225		0.45
1995-03-19	0.237		0.45
1995-03-20	0.25		0.64
1995-03-21	0.333		0.93
1995-03-22	1.04		1.06
1995-03-23	1.28		1.33
1995-03-24	1.61		2.18
1995-03-25	2.35		3.1
1995-03-26	3.66		3.72
1995-03-27	3.97		5.29
1995-03-28	4.28		6.08
1995-03-29	4.56		6.86
1995-03-30	4.91		8.35
1995-03-31	5.01		8.64
1995-04-01	4.71		8.33
1995-04-02	4.72		7.44
1995-04-03	4.49		6.42
1995-04-04	3.47		5.45
1995-04-05	2.59		4.58
1995-04-06	1.73		3.84
1995-04-07	0.942		3.22
1995-04-08	0.877		2.7
1995-04-09	0.812		2.28
1995-04-10	0.75		1.94
1995-04-11	0.689		1.65
1995-04-12	1.43		1.46
1995-04-13	1.95		2
1995-04-14	1.91		3.15
1995-04-15	1.56		3.5
1995-04-16	1.2		3.3
1995-04-17	0.935		2.92
1995-04-18	0.729		2.49
1995-04-19	0.582		2.08
1995-04-20	0.494		1.75
1995-04-21	0.4		1.47
1995-04-22	0.306		1.26
1995-04-23	0.245		1.08
1995-04-24	0.207		0.94
1995-04-25	0.179		0.83
1995-04-26	0.149		0.74
1995-04-27	0.137		0.65
1995-04-28	0.127		0.55
1995-04-29	0.115		0.46
1995-04-30	0.12		0.38
1995-05-01	0.118		0.33
1995-05-02	0.116		0.31
1995-05-03	0.115		0.29
1995-05-04	0.114		0.26
1995-05-05	0.113		0.24
1995-05-06	0.112		0.25
1995-05-07	0.111		0.26
1995-05-08	0.109		0.24
1995-05-09	0.099		0.25
1995-05-10	0.071		0.28
1995-05-11	0.075		0.32
1995-05-12	0.096		0.36
1995-05-13	0.091		0.37
1995-05-14	0.067		0.34
1995-05-15	0.033		0.3
1995-05-16	0.031		0.28
1995-05-17	0.012		0.28
1995-05-18	0.02		0.29
1995-05-19	0.047		0.29
1995-05-20	0.043		0.3
1995-05-21	0.017		0.32
1995-05-22	0.091		0.35
1995-05-23	0.093		0.43
1995-05-24	0.088		0.44
1995-05-25	0.131		0.43
1995-05-26	0.252		0.41
1995-05-27	0.238		0.38
1995-05-28	0.207		0.35
1995-05-29	0.178		0.31
1995-05-30	0.163		0.28
1995-05-31	0.156		0.25
1995-06-01	0.169		0.22
1995-06-02	0.23		0.2
1995-06-03	0.299		0.18
1995-06-04	0.295		0.16
1995-06-05	0.28		0.15
1995-06-06	0.271		0.13
1995-06-07	0.29		0.15
1995-06-08	0.295		0.21
1995-06-09	0.264		0.21
1995-06-10	0.245		0.2
1995-06-11	0.245		0.18
1995-06-12	0.246		0.16
1995-06-13	0.254		0.14
1995-06-14	0.255		0.12
1995-06-15	0.268		0.11
1995-06-16	0.264		0.09
1995-06-17	0.237		0.08
1995-06-18	0.206		0.07
1995-06-19	0.186		0.06
1995-06-20	0.151		0.06
1995-06-21	0.14		0.05
1995-06-22	0.159		0.05
1995-06-23	0.206		0.05
1995-06-24	0.255		0.25
1995-06-25	0.274		0.35
1995-06-26	0.261		0.38
1995-06-27	0.256		0.36
1995-06-28	0.258		0.32
1995-06-29	0.233		0.27
1995-06-30	0.217		0.28
1995-07-01	0.217		0.27
1995-07-02	0.29		0.24
1995-07-03	0.39		0.21
1995-07-04	0.408		0.18
1995-07-05	0.382		0.15
1995-07-06	0.384		0.13
1995-07-07	0.37		0.11
1995-07-08	0.35		0.1
1995-07-09	0.33		0.08
1995-07-10	0.31		0.07
1995-07-11	0.29		0.06
1995-07-12	0.26		0.05
1995-07-13	0.23		0.04
1995-07-14	0.25		0.04
1995-07-15	0.27		0.03
1995-07-16	0.29		0.02
1995-07-17	0.27		0.17
1995-07-18	0.25		0.32
1995-07-19	0.24		0.35
1995-07-20	0.23		0.32
1995-07-21	0.21		0.28
1995-07-22	0.2		0.24
1995-07-23	0.19		0.2
1995-07-24	0.18		0.17
1995-07-25	0.17		0.14
1995-07-26	0.19		0.11
1995-07-27	0.21		0.09
1995-07-28	0.23		0.08
1995-07-29	0.21		0.06
1995-07-30	0.2		0.05
1995-07-31	0.19		0.06
1995-08-01	0.18		0.05
1995-08-02	0.17		0.05
1995-08-03	0.16		0.04
1995-08-04	0.15		0.03
1995-08-05	0.14		0.03
1995-08-06	0.13		0.02
1995-08-07	0.125		0.02
1995-08-08	0.12		0.02
1995-08-09	0.115		0.02
1995-08-10	0.11		0.02
1995-08-11	0.1		0.01
1995-08-12	0.15		0.01
1995-08-13	0.4		0.01
1995-08-14	0.669		0.17
1995-08-15	0.654		1.37
1995-08-16	0.746		1.94
1995-08-17	0.836		1.95
1995-08-18	0.9		1.75
1995-08-19	0.889		1.58
1995-08-20	0.77		1.4
1995-08-21	0.729		1.19
1995-08-22	0.758		0.99
1995-08-23	0.753		0.83
1995-08-24	0.73		0.73
1995-08-25	0.704		0.62
1995-08-26	0.677		0.52
1995-08-27	0.674		0.42
1995-08-28	0.699		0.35
1995-08-29	0.681		0.27
1995-08-30	0.742		0.28
1995-08-31	0.672		0.35
1995-09-01	0.647		0.34
1995-09-02	0.651		0.31
1995-09-03	0.636		0.27
1995-09-04	0.604		0.23
1995-09-05	0.565		0.19
1995-09-06	0.651		0.16
1995-09-07	0.582		0.15
1995-09-08	0.544		0.14
1995-09-09	0.517		0.12
1995-09-10	0.481		0.11
1995-09-11	0.434		0.09
1995-09-12	0.405		0.08
1995-09-13	0.383		0.07
1995-09-14	0.366		0.06
1995-09-15	0.384		0.05
1995-09-16	0.402		0.05
1995-09-17	0.428		0.05
1995-09-18	0.437		0.04
1995-09-19	0.438		0.04
1995-09-20	0.443		0.05
1995-09-21	0.462		0.09
1995-09-22	0.446		0.11
1995-09-23	0.442		0.13
1995-09-24	0.392		0.13
1995-09-25	0.356		0.12
1995-09-26	0.377		0.11
1995-09-27	0.396		0.1
1995-09-28	0.434		0.09
1995-09-29	0.467		0.08
1995-09-30	0.512		0.08
1995-10-01	0.503		0.07
1995-10-02	0.478		0.07
1995-10-03	0.482		0.07
1995-10-04	0.464		0.06
1995-10-05	0.418		0.06
1995-10-06	0.358		0.06
1995-10-07	0.373		0.06
1995-10-08	0.425		0.06
1995-10-09	0.409		0.06
1995-10-10	0.366		0.05
1995-10-11	0.322		0.05
1995-10-12	0.277		0.05
1995-10-13	0.271		0.05
1995-10-14	0.293		0.05
1995-10-15	0.326		0.07
1995-10-16	0.342		0.07
1995-10-17	0.356		0.07
1995-10-18	0.324		0.07
1995-10-19	0.4		0.07
1995-10-20	0.349		0.12
1995-10-21	0.273		0.14
1995-10-22	0.229		0.14
1995-10-23	0.202		0.14
1995-10-24	0.202		0.13
1995-10-25	0.222		0.12
1995-10-26	0.223		0.11
1995-10-27	0.237		0.1
1995-10-28	0.267		0.1
1995-10-29	0.265		0.1
1995-10-30	0.242		0.1
1995-10-31	0.231		0.1
1995-11-01
1995-11-02
1995-11-03
1995-11-04
1995-11-05
1995-11-06
1995-11-07
1995-11-08
1995-11-09
1995-11-10
1995-11-11
1995-11-12
1995-11-13
1995-11-14
1995-11-15
1995-11-16
1995-11-17
1995-11-18
1995-11-19
1995-11-20
1995-11-21
1995-11-22
1995-11-23
1995-11-24
1995-11-25
1995-11-26
1995-11-27
1995-11-28
1995-11-29
1995-11-30
1995-12-01
1995-12-02
1995-12-03
1995-12-04
1995-12-05
1995-12-06
1995-12-07
1995-12-08
1995-12-09
1995-12-10
1995-12-11
1995-12-12
1995-12-13
1995-12-14
1995-12-15
1995-12-16
1995-12-17
1995-12-18
1995-12-19
1995-12-20
1995-12-21
1995-12-22
1995-12-23
1995-12-24
1995-12-25
1995-12-26
1995-12-27
1995-12-28
1995-12-29
1995-12-30
1995-12-31
1996-01-01
1996-01-02
1996-01-03
1996-01-04
1996-01-05
1996-01-06
1996-01-07
1996-01-08
1996-01-09
1996-01-10
1996-01-11
1996-01-12
1996-01-13
1996-01-14
1996-01-15
1996-01-16
1996-01-17
1996-01-18
1996-01-19
1996-01-20
1996-01-21
1996-01-22
1996-01-23
1996-01-24
1996-01-25
1996-01-26
1996-01-27
1996-01-28
1996-01-29
1996-01-30
1996-01-31
1996-02-01
1996-02-02
1996-02-03
1996-02-04
1996-02-05
1996-02-06
1996-02-07
1996-02-08
1996-02-09
1996-02-10
1996-02-11
1996-02-12
1996-02-13
1996-02-14
1996-02-15
1996-02-16
1996-02-17
1996-02-18
1996-02-19
1996-02-20
1996-02-21
1996-02-22
1996-02-23
1996-02-24
1996-02-25
1996-02-26
1996-02-27
1996-02-28
1996-02-29
1996-03-01	0.015		0.08	0.015
1996-03-02	0.015		0.08
1996-03-03	0.015		0.08
1996-03-04	0.015		0.08
1996-03-05	0.015		0.08
1996-03-06	0.014		0.08
1996-03-07	0.014		0.07
1996-03-08	0.014		0.07
1996-03-09	0.014		0.07
1996-03-10	0.014		0.07
1996-03-11	0.015		0.07
1996-03-12	0.015		0.07
1996-03-13	0.015		0.07
1996-03-14	0.015		0.09
1996-03-15	0.015		0.28
1996-03-16	0.014		0.56
1996-03-17	0.014		0.66
1996-03-18	0.014		0.67
1996-03-19	0.014		0.65
1996-03-20	0.014		0.61
1996-03-21	0.013		0.57
1996-03-22	0.013		0.54
1996-03-23	0.013		0.5
1996-03-24	0.013		0.46
1996-03-25	0.013		0.43
1996-03-26	0.013		0.4
1996-03-27	0.012		0.38
1996-03-28	0.012		0.36
1996-03-29	0.012		0.34
1996-03-30	0.012		0.32
1996-03-31	0.012		0.31
1996-04-01	0.012		0.3
1996-04-02	0.012		0.29
1996-04-03	0.012		0.28
1996-04-04	0.012		0.27
1996-04-05	0.012		0.26
1996-04-06	0.013		0.26
1996-04-07	0.013		0.25
1996-04-08	0.014		0.25
1996-04-09	0.016		0.24
1996-04-10	0.018		0.22
1996-04-11	0.02		0.3	0.02
1996-04-12	0.019		0.83
1996-04-13	0.018		1.67
1996-04-14	0.018		2.1
1996-04-15	0.02		2.21
1996-04-16	0.05		2.2
1996-04-17	0.2		2.13
1996-04-18	0.586		2.28	0.54
1996-04-19	1.06		3.09
1996-04-20	1.37		5.09
1996-04-21	1.75		6.75
1996-04-22	2.14		6.76
1996-04-23	3.42		6.27
1996-04-24	5.15		6.85	5.1
1996-04-25	6.64		9.18
1996-04-26	8.01		10.77
1996-04-27	9.54		10.36
1996-04-28	11.2		9.06
1996-04-29	13.5		9.45	13.9
1996-04-30	13.4		11.8
1996-05-01	12.7		12.78
1996-05-02	11.8		12.31
1996-05-03	11		10.95
1996-05-04	10.3		9.41
1996-05-05	9.24		7.93
1996-05-06	7.24		6.55
1996-05-07	4.46		5.34
1996-05-08	2.99		4.32	2.92
1996-05-09	1.89		3.5
1996-05-10	1.31		2.86
1996-05-11	1.06		2.33
1996-05-12	0.836		1.91
1996-05-13	0.658		1.56
1996-05-14	0.673		1.27
1996-05-15	0.694		1.04
1996-05-16	0.613		0.91
1996-05-17	1.22		0.82
1996-05-18	1.14		0.82
1996-05-19	2.07		0.98
1996-05-20	2.22		1.09
1996-05-21	1.62		1.08
1996-05-22	1.2		1.02	1.2
1996-05-23	0.99		0.94
1996-05-24	0.878		0.86
1996-05-25	0.741		0.79
1996-05-26	0.613		0.73
1996-05-27	0.522		0.67
1996-05-28	0.476		0.62
1996-05-29	0.539		0.59
1996-05-30	0.504		0.59
1996-05-31	0.479		0.58
1996-06-01	0.501		0.59
1996-06-02	0.477		0.59
1996-06-03	0.448		0.6
1996-06-04	0.424		0.6
1996-06-05	0.426		0.57
1996-06-06	0.464		0.66
1996-06-07	0.442		0.74	0.438
1996-06-08	0.46		0.76
1996-06-09	0.466		0.76
1996-06-10	0.452		0.74
1996-06-11	0.42		0.73
1996-06-12	0.387		0.72
1996-06-13	0.354		0.73
1996-06-14	0.322		0.73
1996-06-15	0.303		0.72
1996-06-16	0.092		0.71
1996-06-17	0.15		0.71
1996-06-18	0.223		0.66
1996-06-19	0.311		1.08
1996-06-20	0.357		1.45
1996-06-21	0.428		1.73
1996-06-22	0.53		1.74
1996-06-23	0.581		1.62
1996-06-24	0.576		1.46
1996-06-25	0.573		1.29
1996-06-26	0.559		1.15
1996-06-27	0.536		1.04
1996-06-28	0.523		0.95
1996-06-29	0.506		0.91
1996-06-30	0.506		0.91
1996-07-01	0.493		0.89
1996-07-02	0.438		0.83
1996-07-03	0.4		0.75
1996-07-04	0.375		0.68
1996-07-05	0.365		0.62
1996-07-06	0.369		0.58
1996-07-07	0.368		0.54
1996-07-08	0.783		0.53
1996-07-09	0.215		0.57
1996-07-10	0.176		0.55
1996-07-11	0.288		0.58
1996-07-12	0.372		0.67	0.384
1996-07-13	0.389		0.64
1996-07-14	0.385		0.56
1996-07-15	0.396		0.48
1996-07-16	0.372		0.4
1996-07-17	0.347		0.33
1996-07-18	0.353		0.28
1996-07-19	0.327		0.21
1996-07-20	0.383		0.43
1996-07-21	0.383		0.98
1996-07-22	0.364		1.09
1996-07-23	0.394		1.01
1996-07-24	0.349		0.88
1996-07-25	0.301		0.78
1996-07-26	0.304		0.68
1996-07-27	0.332		0.63
1996-07-28	0.322		0.7
1996-07-29	0.316		0.65
1996-07-30	0.313		0.57
1996-07-31	0.312		0.48
1996-08-01	0.292		0.4
1996-08-02	0.284		0.33
1996-08-03	0.282		0.27
1996-08-04	0.29		0.21
1996-08-05	0.305		0.18
1996-08-06	0.288		0.15
1996-08-07	0.28		0.12
1996-08-08	0.277		0.1
1996-08-09	0.274		0.08
1996-08-10	0.256		0.07
1996-08-11	0.267		0.06
1996-08-12	0.261		0.05
1996-08-13	0.247		0.04
1996-08-14	0.232		0.04
1996-08-15	0.216		0.03
1996-08-16	0.209		0.03
1996-08-17	0.206		0.02
1996-08-18	0.203		0.02
1996-08-19	0.214		0.02
1996-08-20	0.219		0.03
1996-08-21	0.285		0.03
1996-08-22	0.273		0.03
1996-08-23	0.284		0.04
1996-08-24	0.298		0.04
1996-08-25	0.294		0.04
1996-08-26	0.281		0.03	0.281
1996-08-27	0.275		0.03
1996-08-28	0.262		0.03
1996-08-29	0.253		0.02
1996-08-30	0.241		0.02
1996-08-31	0.217		0.02
1996-09-01	0.23		0.04
1996-09-02	0.257		0.64
1996-09-03	0.232		1.02
1996-09-04	0.242		1.06
1996-09-05	0.28		0.99
1996-09-06	0.284		1.39
1996-09-07	0.269		1.43
1996-09-08	0.267		1.3
1996-09-09	0.279		1.12
1996-09-10	0.304		0.98
1996-09-11	0.301		0.84
1996-09-12	0.269		0.72
1996-09-13	0.214		0.61
1996-09-14	0.172		0.51
1996-09-15	0.145		0.42
1996-09-16	0.125		0.34
1996-09-17	0.105		0.28
1996-09-18	0.079		0.23
1996-09-19	0.084		0.19
1996-09-20	0.056		0.16
1996-09-21	0.097		0.13
1996-09-22	0.253		0.11
1996-09-23	0.275		0.11
1996-09-24	0.274		0.1
1996-09-25	0.263		0.09
1996-09-26	0.254		0.08
1996-09-27	0.222		0.14
1996-09-28	0.205		0.19
1996-09-29	0.205		0.19
1996-09-30	0.205		0.18
1996-10-01	0.244		0.16	0.21
1996-10-02	0.253		0.16
1996-10-03	0.22		0.17
1996-10-04	0.202		0.16
1996-10-05	0.197		0.15
1996-10-06	0.203		0.13
1996-10-07	0.217		0.12
1996-10-08	0.267		0.11
1996-10-09	0.244		0.1
1996-10-10	0.212		0.09
1996-10-11	0.179		0.08
1996-10-12	0.14		0.08
1996-10-13	0.152		0.07
1996-10-14	0.211		0.07
1996-10-15	0.203		0.07
1996-10-16	0.179		0.06
1996-10-17	0.158		0.06
1996-10-18	0.186		0.06
1996-10-19	0.213		0.06
1996-10-20	0.207		0.06
1996-10-21	0.206		0.06
1996-10-22	0.211		0.07
1996-10-23	0.211		0.08
1996-10-24	0.222		0.08
1996-10-25	0.231		0.08
1996-10-26	0.264		0.08
1996-10-27	0.264		0.08
1996-10-28	0.248		0.08
1996-10-29	0.232		0.08
1996-10-30	0.177		0.07
1996-10-31	0.175		0.07	0.175
1996-11-01
1996-11-02
1996-11-03
1996-11-04
1996-11-05
1996-11-06
1996-11-07
1996-11-08
1996-11-09
1996-11-10
1996-11-11
1996-11-12
1996-11-13
1996-11-14
1996-11-15
1996-11-16
1996-11-17
1996-11-18
1996-11-19
1996-11-20
1996-11-21
1996-11-22
1996-11-23
1996-11-24
1996-11-25
1996-11-26
1996-11-27
1996-11-28
1996-11-29
1996-11-30
1996-12-01
1996-12-02
1996-12-03
1996-12-04
1996-12-05
1996-12-06
1996-12-07
1996-12-08
1996-12-09
1996-12-10
1996-12-11
1996-12-12
1996-12-13
1996-12-14
1996-12-15
1996-12-16
1996-12-17
1996-12-18
1996-12-19
1996-12-20
1996-12-21
1996-12-22
1996-12-23
1996-12-24
1996-12-25
1996-12-26
1996-12-27
1996-12-28
1996-12-29
1996-12-30
1996-12-31
1997-01-01
1997-01-02
1997-01-03
1997-01-04
1997-01-05
1997-01-06
1997-01-07
1997-01-08
1997-01-09
1997-01-10
1997-01-11
1997-01-12
1997-01-13
1997-01-14
1997-01-15
1997-01-16
1997-01-17
1997-01-18
1997-01-19
1997-01-20
1997-01-21
1997-01-22
1997-01-23
1997-01-24
1997-01-25
1997-01-26
1997-01-27
1997-01-28
1997-01-29
1997-01-30
1997-01-31
1997-02-01
1997-02-02
1997-02-03
1997-02-04
1997-02-05
1997-02-06
1997-02-07
1997-02-08
1997-02-09
1997-02-10
1997-02-11
1997-02-12
1997-02-13
1997-02-14
1997-02-15
1997-02-16
1997-02-17
1997-02-18
1997-02-19
1997-02-20
1997-02-21
1997-02-22
1997-02-23
1997-02-24
1997-02-25
1997-02-26
1997-02-27
1997-02-28
1997-03-01
1997-03-02
1997-03-03
1997-03-04
1997-03-05
1997-03-06
1997-03-07
1997-03-08
1997-03-09
1997-03-10
1997-03-11
1997-03-12
1997-03-13
1997-03-14
1997-03-15
1997-03-16
1997-03-17
1997-03-18
1997-03-19
1997-03-20
1997-03-21
1997-03-22
1997-03-23
1997-03-24
1997-03-25
1997-03-26
1997-03-27
1997-03-28
1997-03-29
1997-03-30
1997-03-31
1997-04-01
1997-04-02
1997-04-03
1997-04-04
1997-04-05
1997-04-06
1997-04-07
1997-04-08
1997-04-09
1997-04-10
1997-04-11
1997-04-12
1997-04-13
1997-04-14
1997-04-15
1997-04-16
1997-04-17
1997-04-18
1997-04-19
1997-04-20
1997-04-21
1997-04-22
1997-04-23
1997-04-24
1997-04-25
1997-04-26
1997-04-27
1997-04-28
1997-04-29
1997-04-30
1997-05-01
1997-05-02
1997-05-03
1997-05-04
1997-05-05
1997-05-06
1997-05-07
1997-05-08
1997-05-09
1997-05-10
1997-05-11
1997-05-12
1997-05-13
1997-05-14
1997-05-15
1997-05-16
1997-05-17
1997-05-18
1997-05-19
1997-05-20
1997-05-21
1997-05-22
1997-05-23
1997-05-24
1997-05-25
1997-05-26
1997-05-27
1997-05-28
1997-05-29
1997-05-30
1997-05-31
1997-06-01
1997-06-02
1997-06-03
1997-06-04
1997-06-05
1997-06-06
1997-06-07
1997-06-08
1997-06-09
1997-06-10
1997-06-11
1997-06-12
1997-06-13
1997-06-14
1997-06-15
1997-06-16
1997-06-17
1997-06-18
1997-06-19
1997-06-20
[truncated: 5,977 more rows]
