# Supplementary material for: Simulating cold-region hydrology in an intensively drained agricultural watershed in Manitoba, Canada, using the Cold Regions Hydrological Model
Source: Copernicus journal article supplement (doi:10.5194/hess-2016-462), 2016-09-27
Supplement: Supplementary file 7 [file Cordeiro2016_PlotDataFig05.xlsx]

## Sheet: Sheet1
	Peak discharge (m^3/s)
Year	Observed	Simulated	Median
1992	6.66	6.81	6.7
1993	5.6	5.03	6.7
1994	0.75	3.31	6.7
1995	5.01	10.11	6.7
1996	13.5	13.18	6.7
1997	0	0	6.7
1998	0	0	6.7
1999	0	0	6.7
2000	0	0	6.7
2001	0	0	6.7
2002	1.57	4.9	6.7
2003	2.06	2.87	6.7
2004	0	0	6.7
2005	10	9.45	6.7
2006	16.5	11.95	6.7
2007	4.57	9.99	6.7
2008	0	0	6.7
2009	13.3	10.69	6.7
2010	10.7	4.4	6.7
2011	15.7	12.45	6.7
2012	2.49	2.26	6.7
2013	9.42	11.79	6.7
NOTE: Years maked as red had missing or bad data. Values were assinged as 0.
