# Supplementary material for: Simulating cold-region hydrology in an intensively drained agricultural watershed in Manitoba, Canada, using the Cold Regions Hydrological Model
Source: Copernicus journal article supplement (doi:10.5194/hess-2016-462), 2016-09-27
Supplement: Supplementary file 9 [file Cordeiro2016_PlotDataFig06.xlsx]

## Sheet: Sheet1
	Annual cumulative discharge (m^3)
Date	Observed	Backwater	Simulated
1992-01-01	0		0
1992-01-02	0		0
1992-01-03	0		0
1992-01-04	0		0
1992-01-05	0		0
1992-01-06	0		0
1992-01-07	0		0
1992-01-08	0		0
1992-01-09	0		0
1992-01-10	0		0
1992-01-11	0		0
1992-01-12	0		0
1992-01-13	0		0
1992-01-14	0		0
1992-01-15	0		0
1992-01-16	0		0
1992-01-17	0		0
1992-01-18	0		0
1992-01-19	0		0
1992-01-20	0		0
1992-01-21	0		0
1992-01-22	0		0
1992-01-23	0		0
1992-01-24	0		0
1992-01-25	0		0
1992-01-26	0		0
1992-01-27	0		0
1992-01-28	0		0
1992-01-29	0		0
1992-01-30	0		0
1992-01-31	0		0
1992-02-01	0		0
1992-02-02	0		0
1992-02-03	0		0
1992-02-04	0		0
1992-02-05	0		0
1992-02-06	0		0
1992-02-07	0		0
1992-02-08	0		0
1992-02-09	0		0
1992-02-10	0		0
1992-02-11	0		0
1992-02-12	0		0
1992-02-13	0		0
1992-02-14	0		0
1992-02-15	0		0
1992-02-16	0		0
1992-02-17	0		0
1992-02-18	0		0
1992-02-19	0		0
1992-02-20	0		0
1992-02-21	0		0
1992-02-22	0		0
1992-02-23	0		0
1992-02-24	0		0
1992-02-25	0		0
1992-02-26	0		0
1992-02-27	0		0
1992-02-28	0		0
1992-02-29	0		0
1992-03-01	12600		5130
1992-03-02	25300		10400
1992-03-03	38000		17100
1992-03-04	50800		26200
1992-03-05	63700		36600
1992-03-06	76600		48300
1992-03-07	89700		60000
1992-03-08	103000		71500
1992-03-09	116000		82300
1992-03-10	128000		92600
1992-03-11	141000		102000
1992-03-12	154000		111000
1992-03-13	167000		120000
1992-03-14	180000		128000
1992-03-15	192000		136000
1992-03-16	205000		144000
1992-03-17	218000		151000
1992-03-18	231000		158000
1992-03-19	243000		165000
1992-03-20	256000		172000
1992-03-21	268000		179000
1992-03-22	281000		186000
1992-03-23	293000		193000
1992-03-24	306000		201000
1992-03-25	319000		223000
1992-03-26	332000		278000
1992-03-27	351000		346000
1992-03-28	384000		417000
1992-03-29	425000		486000
1992-03-30	552000		557000
1992-03-31	697000		642000
1992-04-01	860000		735000
1992-04-02	1050000		826000
1992-04-03	1260000		912000
1992-04-04	1480000		991000
1992-04-05	1710000		1080000
1992-04-06	2000000		1190000
1992-04-07	2390000		1400000
1992-04-08	2910000		1760000
1992-04-09	3480000		2270000
1992-04-10	4030000		2860000
1992-04-11	4470000		3440000
1992-04-12	4810000		3960000
1992-04-13	5070000		4410000
1992-04-14	5260000		4790000
1992-04-15	5380000		5100000
1992-04-16	5480000		5370000
1992-04-17	5570000		5590000
1992-04-18	5660000		5770000
1992-04-19	5780000		5910000
1992-04-20	5910000		6040000
1992-04-21	6020000		6140000
1992-04-22	6120000		6230000
1992-04-23	6210000		6300000
1992-04-24	6290000		6360000
1992-04-25	6360000		6410000
1992-04-26	6420000		6450000
1992-04-27	6470000		6480000
1992-04-28	6520000		6520000
1992-04-29	6570000		6550000
1992-04-30	6620000		6580000
1992-05-01	6670000		6610000
1992-05-02	6710000		6650000
1992-05-03	6750000		6690000
1992-05-04	6790000		6740000
1992-05-05	6830000		6780000
1992-05-06	6860000		6830000
1992-05-07	6890000		6870000
1992-05-08	6910000		6920000
1992-05-09	6940000		6970000
1992-05-10	6960000		7010000
1992-05-11	6980000		7050000
1992-05-12	7000000		7090000
1992-05-13	7010000		7140000
1992-05-14	7030000		7190000
1992-05-15	7040000		7240000
1992-05-16	7060000		7290000
1992-05-17	7070000		7320000
1992-05-18	7080000		7360000
1992-05-19	7090000		7400000
1992-05-20	7100000		7450000
1992-05-21	7110000		7500000
1992-05-22	7120000		7550000
1992-05-23	7130000		7610000
1992-05-24	7130000		7670000
1992-05-25	7140000		7720000
1992-05-26	7150000		7770000
1992-05-27	7170000		7820000
1992-05-28	7200000		7860000
1992-05-29	7230000		7900000
1992-05-30	7260000		7940000
1992-05-31	7280000		7980000
1992-06-01	7300000		8020000
1992-06-02	7310000		8050000
1992-06-03	7310000		8080000
1992-06-04	7330000		8110000
1992-06-05	7360000		8150000
1992-06-06	7390000		8200000
1992-06-07	7430000		8250000
1992-06-08	7450000		8290000
1992-06-09	7480000		8330000
1992-06-10	7510000		8370000
1992-06-11	7550000		8400000
1992-06-12	7590000		8430000
1992-06-13	7620000		8460000
1992-06-14	7650000		8480000
1992-06-15	7670000		8500000
1992-06-16	7690000		8520000
1992-06-17	7710000		8540000
1992-06-18	7750000		8560000
1992-06-19	7780000		8580000
1992-06-20	7820000		8610000
1992-06-21	7850000		8640000
1992-06-22	7880000		8670000
1992-06-23	7910000		8690000
1992-06-24	7940000		8710000
1992-06-25	7970000		8740000
1992-06-26	8010000		8770000
1992-06-27	8040000		8800000
1992-06-28	8080000		8840000
1992-06-29	8110000		8870000
1992-06-30	8150000		8900000
1992-07-01	8180000		8920000
1992-07-02	8220000		8940000
1992-07-03	8260000		8970000
1992-07-04	8290000		9010000
1992-07-05	8330000		9040000
1992-07-06	8360000		9080000
1992-07-07	8400000		9120000
1992-07-08	8440000		9150000
1992-07-09	8470000		9180000
1992-07-10	8510000		9200000
1992-07-11	8550000		9230000
1992-07-12	8580000		9250000
1992-07-13	8620000		9260000
1992-07-14	8660000		9280000
1992-07-15	8700000		9300000
1992-07-16	8740000		9320000
1992-07-17	8780000		9350000
1992-07-18	8820000		9370000
1992-07-19	8860000		9400000
1992-07-20	8900000		9420000
1992-07-21	8950000		9450000
1992-07-22	8980000		9470000
1992-07-23	9020000		9490000
1992-07-24	9060000		9500000
1992-07-25	9100000		9520000
1992-07-26	9140000		9530000
1992-07-27	9180000		9550000
1992-07-28	9220000		9570000
1992-07-29	9260000		9580000
1992-07-30	9300000		9600000
1992-07-31	9340000		9620000
1992-08-01	9380000		9630000
1992-08-02	9420000		9640000
1992-08-03	9460000		9660000
1992-08-04	9500000		9670000
1992-08-05	9540000		9680000
1992-08-06	9580000		9690000
1992-08-07	9610000		9700000
1992-08-08	9640000		9710000
1992-08-09	9680000		9720000
1992-08-10	9710000		9730000
1992-08-11	9730000		9730000
1992-08-12	9760000		9740000
1992-08-13	9780000		9750000
1992-08-14	9800000		9760000
1992-08-15	9830000		9760000
1992-08-16	9850000		9770000
1992-08-17	9870000		9780000
1992-08-18	9890000		9780000
1992-08-19	9910000		9790000
1992-08-20	9920000		9800000
1992-08-21	9930000		9800000
1992-08-22	9940000		9810000
1992-08-23	9950000		9820000
1992-08-24	9950000		9830000
1992-08-25	9970000		9850000
1992-08-26	9990000		9870000
1992-08-27	10000000		9890000
1992-08-28	10000000		9900000
1992-08-29	10000000		9920000
1992-08-30	10100000		9930000
1992-08-31	10100000		9950000
1992-09-01	10100000		9970000
1992-09-02	10100000		9980000
1992-09-03	10100000		10000000
1992-09-04	10200000		10000000
1992-09-05	10200000		10000000
1992-09-06	10200000		10000000
1992-09-07	10200000		10100000
1992-09-08	10200000		10100000
1992-09-09	10200000		10100000
1992-09-10	10300000		10100000
1992-09-11	10300000		10100000
1992-09-12	10300000		10200000
1992-09-13	10400000		10200000
1992-09-14	10400000		10200000
1992-09-15	10500000		10200000
1992-09-16	10500000		10200000
1992-09-17	10500000		10300000
1992-09-18	10600000		10300000
1992-09-19	10600000		10300000
1992-09-20	10600000		10300000
1992-09-21	10700000		10400000
1992-09-22	10700000		10400000
1992-09-23	10800000		10400000
1992-09-24	10800000		10400000
1992-09-25	10900000		10400000
1992-09-26	10900000		10400000
1992-09-27	10900000		10500000
1992-09-28	11000000		10500000
1992-09-29	11000000		10500000
1992-09-30	11100000		10500000
1992-10-01	11100000		10500000
1992-10-02	11200000		10500000
1992-10-03	11200000		10500000
1992-10-04	11300000		10600000
1992-10-05	11300000		10600000
1992-10-06	11300000		10600000
1992-10-07	11400000		10600000
1992-10-08	11400000		10600000
1992-10-09	11400000		10600000
1992-10-10	11400000		10600000
1992-10-11	11500000		10600000
1992-10-12	11500000		10700000
1992-10-13	11500000		10700000
1992-10-14	11600000		10700000
1992-10-15	11600000		10700000
1992-10-16	11600000		10700000
1992-10-17	11700000		10700000
1992-10-18	11700000		10700000
1992-10-19	11700000		10700000
1992-10-20	11800000		10800000
1992-10-21	11800000		10800000
1992-10-22	11800000		10800000
1992-10-23	11800000		10800000
1992-10-24	11900000		10800000
1992-10-25	11900000		10800000
1992-10-26	11900000		10800000
1992-10-27	12000000		10800000
1992-10-28	12000000		10900000
1992-10-29	12000000		10900000
1992-10-30	12100000		10900000
1992-10-31	12100000		10900000
1992-11-01	12100000		10900000
1992-11-02	12100000		10900000
1992-11-03	12100000		10900000
1992-11-04	12100000		10900000
1992-11-05	12100000		10900000
1992-11-06	12100000		10900000
1992-11-07	12100000		10900000
1992-11-08	12100000		10900000
1992-11-09	12100000		10900000
1992-11-10	12100000		10900000
1992-11-11	12100000		10900000
1992-11-12	12100000		10900000
1992-11-13	12100000		10900000
1992-11-14	12100000		10900000
1992-11-15	12100000		10900000
1992-11-16	12100000		10900000
1992-11-17	12100000		10900000
1992-11-18	12100000		10900000
1992-11-19	12100000		10900000
1992-11-20	12100000		10900000
1992-11-21	12100000		10900000
1992-11-22	12100000		10900000
1992-11-23	12100000		10900000
1992-11-24	12100000		10900000
1992-11-25	12100000		10900000
1992-11-26	12100000		10900000
1992-11-27	12100000		10900000
1992-11-28	12100000		10900000
1992-11-29	12100000		10900000
1992-11-30	12100000		10900000
1992-12-01	12100000		10900000
1992-12-02	12100000		10900000
1992-12-03	12100000		10900000
1992-12-04	12100000		10900000
1992-12-05	12100000		10900000
1992-12-06	12100000		10900000
1992-12-07	12100000		10900000
1992-12-08	12100000		10900000
1992-12-09	12100000		10900000
1992-12-10	12100000		10900000
1992-12-11	12100000		10900000
1992-12-12	12100000		10900000
1992-12-13	12100000		10900000
1992-12-14	12100000		10900000
1992-12-15	12100000		10900000
1992-12-16	12100000		10900000
1992-12-17	12100000		10900000
1992-12-18	12100000		10900000
1992-12-19	12100000		10900000
1992-12-20	12100000		10900000
1992-12-21	12100000		10900000
1992-12-22	12100000		10900000
1992-12-23	12100000		10900000
1992-12-24	12100000		10900000
1992-12-25	12100000		10900000
1992-12-26	12100000		10900000
1992-12-27	12100000		10900000
1992-12-28	12100000		10900000
1992-12-29	12100000		10900000
1992-12-30	12100000		10900000
1992-12-31	12100000		10900000
1993-01-01	0		0
1993-01-02	0		0
1993-01-03	0		0
1993-01-04	0		0
1993-01-05	0		0
1993-01-06	0		0
1993-01-07	0		0
1993-01-08	0		0
1993-01-09	0		0
1993-01-10	0		0
1993-01-11	0		0
1993-01-12	0		0
1993-01-13	0		0
1993-01-14	0		0
1993-01-15	0		0
1993-01-16	0		0
1993-01-17	0		0
1993-01-18	0		0
1993-01-19	0		0
1993-01-20	0		0
1993-01-21	0		0
1993-01-22	0		0
1993-01-23	0		0
1993-01-24	0		0
1993-01-25	0		0
1993-01-26	0		0
1993-01-27	0		0
1993-01-28	0		0
1993-01-29	0		0
1993-01-30	0		0
1993-01-31	0		0
1993-02-01	0		0
1993-02-02	0		0
1993-02-03	0		0
1993-02-04	0		0
1993-02-05	0		0
1993-02-06	0		0
1993-02-07	0		0
1993-02-08	0		0
1993-02-09	0		0
1993-02-10	0		0
1993-02-11	0		0
1993-02-12	0		0
1993-02-13	0		0
1993-02-14	0		0
1993-02-15	0		0
1993-02-16	0		0
1993-02-17	0		0
1993-02-18	0		0
1993-02-19	0		0
1993-02-20	0		0
1993-02-21	0		0
1993-02-22	0		0
1993-02-23	0		0
1993-02-24	0		0
1993-02-25	0		0
1993-02-26	0		0
1993-02-27	0		0
1993-02-28	0		0
1993-03-01	4750		5680
1993-03-02	9420		11100
1993-03-03	14100		17700
1993-03-04	18700		37800
1993-03-05	23200		76600
1993-03-06	27500		131000
1993-03-07	31700		215000
1993-03-08	35800		349000
1993-03-09	39700		557000
1993-03-10	43400		848000
1993-03-11	47000		1200000
1993-03-12	50600		1540000
1993-03-13	54200		1870000
1993-03-14	57700		2160000
1993-03-15	61200		2430000
1993-03-16	64500		2670000
1993-03-17	67900		2880000
1993-03-18	71200		3070000
1993-03-19	74500		3240000
1993-03-20	77700		3400000
1993-03-21	80900		3540000
1993-03-22	84000		3670000
1993-03-23	87000		3790000
1993-03-24	90700		3900000
1993-03-25	95200		4010000
1993-03-26	101000		4230000
1993-03-27	107000		4630000
1993-03-28	117000		5060000
1993-03-29	130000		5470000
1993-03-30	192000		5830000
1993-03-31	382000		6140000
1993-04-01	590000		6400000
1993-04-02	840000		6620000
1993-04-03	1150000		6810000
1993-04-04	1540000		6960000
1993-04-05	1910000		7090000
1993-04-06	2350000		7190000
1993-04-07	2830000		7280000
1993-04-08	3220000		7350000
1993-04-09	3430000		7410000
1993-04-10	3560000		7460000
1993-04-11	3680000		7510000
1993-04-12	3800000		7550000
1993-04-13	3910000		7580000
1993-04-14	4010000		7620000
1993-04-15	4090000		7650000
1993-04-16	4160000		7680000
1993-04-17	4210000		7710000
1993-04-18	4260000		7750000
1993-04-19	4300000		7780000
1993-04-20	4330000		7820000
1993-04-21	4370000		7850000
1993-04-22	4400000		7880000
1993-04-23	4430000		7920000
1993-04-24	4460000		7950000
1993-04-25	4490000		7980000
1993-04-26	4510000		8020000
1993-04-27	4540000		8050000
1993-04-28	4590000		8090000
1993-04-29	4640000		8130000
1993-04-30	4700000		8170000
1993-05-01	4740000		8210000
1993-05-02	4790000		8250000
1993-05-03	4830000		8290000
1993-05-04	4860000		8330000
1993-05-05	4900000		8370000
1993-05-06	4920000		8410000
1993-05-07	4940000		8450000
1993-05-08	4970000		8500000
1993-05-09	5010000		8550000
1993-05-10	5060000		8630000
1993-05-11	5110000		8720000
1993-05-12	5160000		8810000
1993-05-13	5210000		8900000
1993-05-14	5240000		8980000
1993-05-15	5290000		9060000
1993-05-16	5340000		9130000
1993-05-17	5380000		9200000
1993-05-18	5410000		9260000
1993-05-19	5440000		9320000
1993-05-20	5460000		9370000
1993-05-21	5480000		9420000
1993-05-22	5510000		9470000
1993-05-23	5540000		9510000
1993-05-24	5570000		9560000
1993-05-25	5590000		9610000
1993-05-26	5610000		9660000
1993-05-27	5620000		9700000
1993-05-28	5640000		9750000
1993-05-29	5670000		9790000
1993-05-30	5710000		9830000
1993-05-31	5740000		9880000
1993-06-01	5780000		9910000
1993-06-02	5830000		9950000
1993-06-03	5870000		9990000
1993-06-04	5910000		10000000
1993-06-05	5950000		10100000
1993-06-06	5970000		10100000
1993-06-07	6000000		10100000
1993-06-08	6030000		10200000
1993-06-09	6060000		10200000
1993-06-10	6100000		10300000
1993-06-11	6140000		10300000
1993-06-12	6180000		10400000
1993-06-13	6210000		10400000
1993-06-14	6240000		10500000
1993-06-15	6270000		10500000
1993-06-16	6290000		10600000
1993-06-17	6310000		10600000
1993-06-18	6340000		10600000
1993-06-19	6370000		10700000
1993-06-20	6390000		10700000
1993-06-21	6430000		10700000
1993-06-22	6460000		10800000
1993-06-23	6490000		10800000
1993-06-24	6510000		10800000
1993-06-25	6530000		10800000
1993-06-26	6550000		10900000
1993-06-27	6580000		10900000
1993-06-28	6610000		10900000
1993-06-29	6640000		10900000
1993-06-30	6670000		10900000
1993-07-01	6700000		11000000
1993-07-02	6730000		11000000
1993-07-03	6760000		11100000
1993-07-04	6790000		11200000
1993-07-05	6830000		11300000
1993-07-06	6870000		11400000
1993-07-07	6920000		11600000
1993-07-08	6960000		11700000
1993-07-09	7010000		11800000
1993-07-10	7060000		11900000
1993-07-11	7100000		12000000
1993-07-12	7140000		12100000
1993-07-13	7170000		12200000
1993-07-14	7200000		12200000
1993-07-15	7240000		12300000
1993-07-16	7280000		12300000
1993-07-17	7320000		12300000
1993-07-18	7360000		12400000
1993-07-19	7390000		12400000
1993-07-20	7420000		12500000
1993-07-21	7450000		12500000
1993-07-22	7480000		12600000
1993-07-23	7520000		12600000
1993-07-24	7560000		12600000
1993-07-25	7610000		12700000
1993-07-26	7660000		12700000
1993-07-27	7690000		12800000
1993-07-28	7760000		12900000
1993-07-29	7810000		12900000
1993-07-30	7850000		13000000
1993-07-31	7890000		13100000
1993-08-01	7930000		13100000
1993-08-02	7970000		13200000
1993-08-03	8000000		13200000
1993-08-04	8030000		13300000
1993-08-05	8060000		13300000
1993-08-06	8100000		13300000
1993-08-07	8140000		13300000
1993-08-08	8210000		13400000
1993-08-09	8620000		13500000
1993-08-10	8930000		13600000
1993-08-11	9130000		13700000
1993-08-12	9320000		13900000
1993-08-13	9500000		14000000
1993-08-14	9660000		14100000
1993-08-15	9820000		14200000
1993-08-16	9970000		14300000
1993-08-17	10100000		14400000
1993-08-18	10200000		14500000
1993-08-19	10300000		14500000
1993-08-20	10400000		14600000
1993-08-21	10500000		14700000
1993-08-22	10500000		14700000
1993-08-23	10600000		14800000
1993-08-24	10600000		14800000
1993-08-25	10700000		14800000
1993-08-26	10700000		14900000
1993-08-27	10700000		14900000
1993-08-28	10700000		14900000
1993-08-29	10800000		14900000
1993-08-30	10800000		15000000
1993-08-31	10900000		15000000
1993-09-01	10900000		15000000
1993-09-02	11000000		15000000
1993-09-03	11000000		15100000
1993-09-04	11000000		15100000
1993-09-05	11000000		15100000
1993-09-06	11100000		15100000
1993-09-07	11100000		15200000
1993-09-08	11100000		15200000
1993-09-09	11200000		15200000
1993-09-10	11200000		15200000
1993-09-11	11300000		15300000
1993-09-12	11300000		15300000
1993-09-13	11400000		15300000
1993-09-14	11400000		15300000
1993-09-15	11400000		15400000
1993-09-16	11400000		15400000
1993-09-17	11500000		15400000
1993-09-18	11500000		15400000
1993-09-19	11500000		15500000
1993-09-20	11500000		15500000
1993-09-21	11600000		15500000
1993-09-22	11600000		15500000
1993-09-23	11600000		15600000
1993-09-24	11600000		15600000
1993-09-25	11600000		15600000
1993-09-26	11700000		15600000
1993-09-27	11700000		15700000
1993-09-28	11700000		15700000
1993-09-29	11800000		15700000
1993-09-30	11800000		15700000
1993-10-01	11800000		15700000
1993-10-02	11800000		15800000
1993-10-03	11800000		15800000
1993-10-04	11900000		15800000
1993-10-05	11900000		15800000
1993-10-06	11900000		15800000
1993-10-07	11900000		15900000
1993-10-08	12000000		15900000
1993-10-09	12000000		15900000
1993-10-10	12000000		15900000
1993-10-11	12000000		15900000
1993-10-12	12100000		16000000
1993-10-13	12100000		16000000
1993-10-14	12100000		16000000
1993-10-15	12100000		16000000
1993-10-16	12100000		16000000
1993-10-17	12200000		16100000
1993-10-18	12200000		16100000
1993-10-19	12200000		16100000
1993-10-20	12300000		16100000
1993-10-21	12300000		16100000
1993-10-22	12300000		16200000
1993-10-23	12300000		16200000
1993-10-24	12400000		16200000
1993-10-25	12400000		16200000
1993-10-26	12400000		16200000
1993-10-27	12400000		16300000
1993-10-28	12400000		16300000
1993-10-29	12500000		16300000
1993-10-30	12500000		16300000
1993-10-31	12500000		16300000
1993-11-01	12500000		16300000
1993-11-02	12500000		16300000
1993-11-03	12500000		16300000
1993-11-04	12500000		16300000
1993-11-05	12500000		16300000
1993-11-06	12500000		16300000
1993-11-07	12500000		16300000
1993-11-08	12500000		16300000
1993-11-09	12500000		16300000
1993-11-10	12500000		16300000
1993-11-11	12500000		16300000
1993-11-12	12500000		16300000
1993-11-13	12500000		16300000
1993-11-14	12500000		16300000
1993-11-15	12500000		16300000
1993-11-16	12500000		16300000
1993-11-17	12500000		16300000
1993-11-18	12500000		16300000
1993-11-19	12500000		16300000
1993-11-20	12500000		16300000
1993-11-21	12500000		16300000
1993-11-22	12500000		16300000
1993-11-23	12500000		16300000
1993-11-24	12500000		16300000
1993-11-25	12500000		16300000
1993-11-26	12500000		16300000
1993-11-27	12500000		16300000
1993-11-28	12500000		16300000
1993-11-29	12500000		16300000
1993-11-30	12500000		16300000
1993-12-01	12500000		16300000
1993-12-02	12500000		16300000
1993-12-03	12500000		16300000
1993-12-04	12500000		16300000
1993-12-05	12500000		16300000
1993-12-06	12500000		16300000
1993-12-07	12500000		16300000
1993-12-08	12500000		16300000
1993-12-09	12500000		16300000
1993-12-10	12500000		16300000
1993-12-11	12500000		16300000
1993-12-12	12500000		16300000
1993-12-13	12500000		16300000
1993-12-14	12500000		16300000
1993-12-15	12500000		16300000
1993-12-16	12500000		16300000
1993-12-17	12500000		16300000
1993-12-18	12500000		16300000
1993-12-19	12500000		16300000
1993-12-20	12500000		16300000
1993-12-21	12500000		16300000
1993-12-22	12500000		16300000
1993-12-23	12500000		16300000
1993-12-24	12500000		16300000
1993-12-25	12500000		16300000
1993-12-26	12500000		16300000
1993-12-27	12500000		16300000
1993-12-28	12500000		16300000
1993-12-29	12500000		16300000
1993-12-30	12500000		16300000
1993-12-31	12500000		16300000
1994-01-01	0		0
1994-01-02	0		0
1994-01-03	0		0
1994-01-04	0		0
1994-01-05	0		0
1994-01-06	0		0
1994-01-07	0		0
1994-01-08	0		0
1994-01-09	0		0
1994-01-10	0		0
1994-01-11	0		0
1994-01-12	0		0
1994-01-13	0		0
1994-01-14	0		0
1994-01-15	0		0
1994-01-16	0		0
1994-01-17	0		0
1994-01-18	0		0
1994-01-19	0		0
1994-01-20	0		0
1994-01-21	0		0
1994-01-22	0		0
1994-01-23	0		0
1994-01-24	0		0
1994-01-25	0		0
1994-01-26	0		0
1994-01-27	0		0
1994-01-28	0		0
1994-01-29	0		0
1994-01-30	0		0
1994-01-31	0		0
1994-02-01	0		0
1994-02-02	0		0
1994-02-03	0		0
1994-02-04	0		0
1994-02-05	0		0
1994-02-06	0		0
1994-02-07	0		0
1994-02-08	0		0
1994-02-09	0		0
1994-02-10	0		0
1994-02-11	0		0
1994-02-12	0		0
1994-02-13	0		0
1994-02-14	0		0
1994-02-15	0		0
1994-02-16	0		0
1994-02-17	0		0
1994-02-18	0		0
1994-02-19	0		0
1994-02-20	0		0
1994-02-21	0		0
1994-02-22	0		0
1994-02-23	0		0
1994-02-24	0		0
1994-02-25	0		0
1994-02-26	0		0
1994-02-27	0		0
1994-02-28	0		0
1994-03-01	4840		11600
1994-03-02	9760		23100
1994-03-03	14800		34600
1994-03-04	20100		46000
1994-03-05	25800		57100
1994-03-06	31900		74300
1994-03-07	37600		142000
1994-03-08	42900		313000
1994-03-09	48100		564000
1994-03-10	53100		845000
1994-03-11	58100		1130000
1994-03-12	63200		1410000
1994-03-13	68200		1680000
1994-03-14	73500		1940000
1994-03-15	79200		2170000
1994-03-16	85300		2380000
1994-03-17	91700		2550000
1994-03-18	100000		2700000
1994-03-19	118000		2820000
1994-03-20	144000		2930000
1994-03-21	178000		3010000
1994-03-22	222000		3080000
1994-03-23	257000		3140000
1994-03-24	283000		3190000
1994-03-25	304000		3230000
1994-03-26	325000		3270000
1994-03-27	345000		3300000
1994-03-28	364000		3340000
1994-03-29	383000		3360000
1994-03-30	403000		3390000
1994-03-31	425000		3420000
1994-04-01	447000		3450000
1994-04-02	469000		3470000
1994-04-03	490000		3500000
1994-04-04	509000		3520000
1994-04-05	526000		3550000
1994-04-06	543000		3570000
1994-04-07	560000		3590000
1994-04-08	579000		3620000
1994-04-09	614000		3640000
1994-04-10	679000		3670000
1994-04-11	739000		3700000
1994-04-12	779000		3730000
1994-04-13	808000		3760000
1994-04-14	825000		3790000
1994-04-15	839000		3830000
1994-04-16	854000		3870000
1994-04-17	865000		3900000
1994-04-18	875000		3940000
1994-04-19	885000		3970000
1994-04-20	893000		4010000
1994-04-21	900000		4050000
1994-04-22	904000		4090000
1994-04-23	914000		4130000
1994-04-24	919000		4160000
1994-04-25	921000		4200000
1994-04-26	921000		4240000
1994-04-27	922000		4270000
1994-04-28	922000		4310000
1994-04-29	923000		4340000
1994-04-30	929000		4370000
1994-05-01	931000		4400000
1994-05-02	937000		4430000
1994-05-03	948000		4460000
1994-05-04	958000		4490000
1994-05-05	985000		4510000
1994-05-06	1010000		4540000
1994-05-07	1020000		4560000
1994-05-08	1030000		4580000
1994-05-09	1040000		4600000
1994-05-10	1040000		4630000
1994-05-11	1040000		4650000
1994-05-12	1040000		4670000
1994-05-13	1050000		4690000
1994-05-14	1050000		4710000
1994-05-15	1050000		4730000
1994-05-16	1050000		4750000
1994-05-17	1060000		4770000
1994-05-18	1060000		4790000
1994-05-19	1070000		4810000
1994-05-20	1090000		4830000
1994-05-21	1100000		4850000
1994-05-22	1110000		4880000
1994-05-23	1130000		4910000
1994-05-24	1150000		4940000
1994-05-25	1160000		4970000
1994-05-26	1170000		5000000
1994-05-27	1180000		5020000
1994-05-28	1190000		5050000
1994-05-29	1210000		5070000
1994-05-30	1220000		5090000
1994-05-31	1220000		5120000
1994-06-01	1230000		5140000
1994-06-02	1230000		5160000
1994-06-03	1230000		5180000
1994-06-04	1230000		5200000
1994-06-05	1230000		5220000
1994-06-06	1230000		5230000
1994-06-07	1230000		5250000
1994-06-08	1230000		5270000
1994-06-09	1250000		5290000
1994-06-10	1270000		5310000
1994-06-11	1290000		5330000
1994-06-12	1310000		5350000
1994-06-13	1330000		5370000
1994-06-14	1350000		5400000
1994-06-15	1370000		5420000
1994-06-16	1390000		5450000
1994-06-17	1410000		5470000
1994-06-18	1430000		5490000
1994-06-19	1440000		5510000
1994-06-20	1450000		5530000
1994-06-21	1460000		5550000
1994-06-22	1470000		5570000
1994-06-23	1490000		5590000
1994-06-24	1500000		5610000
1994-06-25	1510000		5630000
1994-06-26	1530000		5640000
1994-06-27	1540000		5660000
1994-06-28	1550000		5680000
1994-06-29	1550000		5700000
1994-06-30	1560000		5730000
1994-07-01	1570000		5760000
1994-07-02	1580000		5790000
1994-07-03	1590000		5810000
1994-07-04	1610000		5860000
1994-07-05	1620000		5920000
1994-07-06	1630000		5990000
1994-07-07	1640000		6050000
1994-07-08	1650000		6100000
1994-07-09	1650000		6150000
1994-07-10	1660000		6190000
1994-07-11	1670000		6260000
1994-07-12	1690000		6430000
1994-07-13	1700000		6620000
1994-07-14	1710000		6800000
1994-07-15	1720000		6950000
1994-07-16	1740000		7090000
1994-07-17	1750000		7210000
1994-07-18	1770000		7310000
1994-07-19	1780000		7400000
1994-07-20	1790000		7470000
1994-07-21	1800000		7530000
1994-07-22	1820000		7580000
1994-07-23	1840000		7630000
1994-07-24	1860000		7660000
1994-07-25	1880000		7690000
1994-07-26	1900000		7720000
1994-07-27	1920000		7750000
1994-07-28	1940000		7770000
1994-07-29	1960000		7790000
1994-07-30	1980000		7800000
1994-07-31	2000000		7830000
1994-08-01	2020000		7850000
1994-08-02	2030000		7880000
1994-08-03	2040000		7900000
1994-08-04	2050000		7920000
1994-08-05	2070000		7940000
1994-08-06	2100000		7960000
1994-08-07	2120000		7980000
1994-08-08	2140000		8000000
1994-08-09	2150000		8030000
1994-08-10	2170000		8050000
1994-08-11	2180000		8070000
1994-08-12	2210000		8090000
1994-08-13	2230000		8140000
1994-08-14	2240000		8190000
1994-08-15	2260000		8240000
1994-08-16	2270000		8280000
1994-08-17	2270000		8320000
1994-08-18	2270000		8350000
1994-08-19	2280000		8380000
1994-08-20	2280000		8410000
1994-08-21	2290000		8430000
1994-08-22	2300000		8450000
1994-08-23	2320000		8470000
1994-08-24	2350000		8490000
1994-08-25	2360000		8500000
1994-08-26	2370000		8520000
1994-08-27	2380000		8530000
1994-08-28	2400000		8550000
1994-08-29	2410000		8570000
1994-08-30	2420000		8590000
1994-08-31	2420000		8610000
1994-09-01	2430000		8620000
1994-09-02	2430000		8640000
1994-09-03	2430000		8650000
1994-09-04	2440000		8680000
1994-09-05	2460000		8700000
1994-09-06	2470000		8730000
1994-09-07	2490000		8760000
1994-09-08	2510000		8780000
1994-09-09	2520000		8810000
1994-09-10	2530000		8830000
1994-09-11	2540000		8840000
1994-09-12	2550000		8860000
1994-09-13	2560000		8880000
1994-09-14	2560000		8890000
1994-09-15	2570000		8910000
1994-09-16	2590000		8920000
1994-09-17	2600000		8940000
1994-09-18	2610000		8950000
1994-09-19	2620000		8970000
1994-09-20	2630000		8980000
1994-09-21	2630000		8990000
1994-09-22	2630000		9010000
1994-09-23	2630000		9040000
1994-09-24	2630000		9070000
1994-09-25	2640000		9090000
1994-09-26	2640000		9110000
1994-09-27	2650000		9140000
1994-09-28	2660000		9160000
1994-09-29	2670000		9170000
1994-09-30	2670000		9190000
1994-10-01	2670000		9210000
1994-10-02	2670000		9220000
1994-10-03	2680000		9240000
1994-10-04	2680000		9250000
1994-10-05	2690000		9270000
1994-10-06	2700000		9280000
1994-10-07	2720000		9300000
1994-10-08	2740000		9330000
1994-10-09	2750000		9360000
1994-10-10	2750000		9400000
1994-10-11	2760000		9430000
1994-10-12	2770000		9450000
1994-10-13	2780000		9480000
1994-10-14	2780000		9510000
1994-10-15	2790000		9530000
1994-10-16	2790000		9550000
1994-10-17	2810000		9580000
1994-10-18	2840000		9600000
1994-10-19	2890000		9630000
1994-10-20	2950000		9660000
1994-10-21	2990000		9690000
1994-10-22	3030000		9720000
1994-10-23	3080000		9750000
1994-10-24	3120000		9780000
1994-10-25	3160000		9810000
1994-10-26	3190000		9840000
1994-10-27	3220000		9870000
1994-10-28	3250000		9910000
1994-10-29	3280000		9940000
1994-10-30	3300000		9970000
1994-10-31	3330000		10000000
1994-11-01	3330000		10000000
1994-11-02	3330000		10000000
1994-11-03	3330000		10000000
1994-11-04	3330000		10000000
1994-11-05	3330000		10000000
1994-11-06	3330000		10000000
1994-11-07	3330000		10000000
1994-11-08	3330000		10000000
1994-11-09	3330000		10000000
1994-11-10	3330000		10000000
1994-11-11	3330000		10000000
1994-11-12	3330000		10000000
1994-11-13	3330000		10000000
1994-11-14	3330000		10000000
1994-11-15	3330000		10000000
1994-11-16	3330000		10000000
1994-11-17	3330000		10000000
1994-11-18	3330000		10000000
1994-11-19	3330000		10000000
1994-11-20	3330000		10000000
1994-11-21	3330000		10000000
1994-11-22	3330000		10000000
1994-11-23	3330000		10000000
1994-11-24	3330000		10000000
1994-11-25	3330000		10000000
1994-11-26	3330000		10000000
1994-11-27	3330000		10000000
1994-11-28	3330000		10000000
1994-11-29	3330000		10000000
1994-11-30	3330000		10000000
1994-12-01	3330000		10000000
1994-12-02	3330000		10000000
1994-12-03	3330000		10000000
1994-12-04	3330000		10000000
1994-12-05	3330000		10000000
1994-12-06	3330000		10000000
1994-12-07	3330000		10000000
1994-12-08	3330000		10000000
1994-12-09	3330000		10000000
1994-12-10	3330000		10000000
1994-12-11	3330000		10000000
1994-12-12	3330000		10000000
1994-12-13	3330000		10000000
1994-12-14	3330000		10000000
1994-12-15	3330000		10000000
1994-12-16	3330000		10000000
1994-12-17	3330000		10000000
1994-12-18	3330000		10000000
1994-12-19	3330000		10000000
1994-12-20	3330000		10000000
1994-12-21	3330000		10000000
1994-12-22	3330000		10000000
1994-12-23	3330000		10000000
1994-12-24	3330000		10000000
1994-12-25	3330000		10000000
1994-12-26	3330000		10000000
1994-12-27	3330000		10000000
1994-12-28	3330000		10000000
1994-12-29	3330000		10000000
1994-12-30	3330000		10000000
1994-12-31	3330000		10000000
1995-01-01	0		0
1995-01-02	0		0
1995-01-03	0		0
1995-01-04	0		0
1995-01-05	0		0
1995-01-06	0		0
1995-01-07	0		0
1995-01-08	0		0
1995-01-09	0		0
1995-01-10	0		0
1995-01-11	0		0
1995-01-12	0		0
1995-01-13	0		0
1995-01-14	0		0
1995-01-15	0		0
1995-01-16	0		0
1995-01-17	0		0
1995-01-18	0		0
1995-01-19	0		0
1995-01-20	0		0
1995-01-21	0		0
1995-01-22	0		0
1995-01-23	0		0
1995-01-24	0		0
1995-01-25	0		0
1995-01-26	0		0
1995-01-27	0		0
1995-01-28	0		0
1995-01-29	0		0
1995-01-30	0		0
1995-01-31	0		0
1995-02-01	0		0
1995-02-02	0		0
1995-02-03	0		0
1995-02-04	0		0
1995-02-05	0		0
1995-02-06	0		0
1995-02-07	0		0
1995-02-08	0		0
1995-02-09	0		0
1995-02-10	0		0
1995-02-11	0		0
1995-02-12	0		0
1995-02-13	0		0
1995-02-14	0		0
1995-02-15	0		0
1995-02-16	0		0
1995-02-17	0		0
1995-02-18	0		0
1995-02-19	0		0
1995-02-20	0		0
1995-02-21	0		0
1995-02-22	0		0
1995-02-23	0		0
1995-02-24	0		0
1995-02-25	0		0
1995-02-26	0		0
1995-02-27	0		0
1995-02-28	0		0
1995-03-01	11100		15600
1995-03-02	22100		31100
1995-03-03	33200		46500
1995-03-04	44200		62000
1995-03-05	55400		77300
1995-03-06	66500		92700
1995-03-07	77700		108000
1995-03-08	88800		123000
1995-03-09	100000		138000
1995-03-10	111000		154000
1995-03-11	123000		169000
1995-03-12	135000		184000
1995-03-13	149000		199000
1995-03-14	164000		213000
1995-03-15	180000		234000
1995-03-16	197000		286000
1995-03-17	215000		360000
1995-03-18	235000		450000
1995-03-19	255000		548000
1995-03-20	277000		666000
1995-03-21	305000		816000
1995-03-22	395000		987000
1995-03-23	506000		1190000
1995-03-24	645000		1460000
1995-03-25	848000		1820000
1995-03-26	1160000		2240000
1995-03-27	1510000		2800000
1995-03-28	1880000		3440000
1995-03-29	2270000		4160000
1995-03-30	2700000		4990000
1995-03-31	3130000		5870000
1995-04-01	3540000		6730000
1995-04-02	3940000		7530000
1995-04-03	4330000		8260000
1995-04-04	4630000		8900000
1995-04-05	4850000		9480000
1995-04-06	5000000		9980000
1995-04-07	5090000		10400000
1995-04-08	5160000		10800000
1995-04-09	5230000		11100000
1995-04-10	5300000		11400000
1995-04-11	5360000		11700000
1995-04-12	5480000		11900000
1995-04-13	5650000		12200000
1995-04-14	5810000		12400000
1995-04-15	5950000		12700000
1995-04-16	6050000		13000000
1995-04-17	6130000		13200000
1995-04-18	6190000		13400000
1995-04-19	6250000		13600000
1995-04-20	6290000		13700000
1995-04-21	6320000		13900000
1995-04-22	6350000		14000000
1995-04-23	6370000		14100000
1995-04-24	6390000		14100000
1995-04-25	6400000		14200000
1995-04-26	6420000		14300000
1995-04-27	6430000		14400000
1995-04-28	6440000		14400000
1995-04-29	6450000		14500000
1995-04-30	6460000		14500000
1995-05-01	6470000		14600000
1995-05-02	6480000		14600000
1995-05-03	6490000		14600000
1995-05-04	6500000		14700000
1995-05-05	6510000		14700000
1995-05-06	6520000		14700000
1995-05-07	6530000		14800000
1995-05-08	6540000		14800000
1995-05-09	6550000		14800000
1995-05-10	6550000		14900000
1995-05-11	6560000		14900000
1995-05-12	6570000		15000000
1995-05-13	6580000		15000000
1995-05-14	6580000		15000000
1995-05-15	6580000		15100000
1995-05-16	6590000		15100000
1995-05-17	6590000		15200000
1995-05-18	6590000		15200000
1995-05-19	6590000		15200000
1995-05-20	6600000		15300000
1995-05-21	6600000		15300000
1995-05-22	6610000		15400000
1995-05-23	6610000		15400000
1995-05-24	6620000		15500000
1995-05-25	6630000		15500000
1995-05-26	6650000		15600000
1995-05-27	6680000		15700000
1995-05-28	6690000		15700000
1995-05-29	6710000		15700000
1995-05-30	6720000		15800000
1995-05-31	6740000		15800000
1995-06-01	6750000		15900000
1995-06-02	6770000		15900000
1995-06-03	6800000		16000000
1995-06-04	6820000		16000000
1995-06-05	6850000		16000000
1995-06-06	6870000		16100000
1995-06-07	6890000		16100000
1995-06-08	6920000		16100000
1995-06-09	6940000		16200000
1995-06-10	6960000		16200000
1995-06-11	6990000		16300000
1995-06-12	7010000		16300000
1995-06-13	7030000		16300000
1995-06-14	7050000		16400000
1995-06-15	7070000		16400000
1995-06-16	7100000		16400000
1995-06-17	7120000		16400000
1995-06-18	7130000		16500000
1995-06-19	7150000		16500000
1995-06-20	7160000		16500000
1995-06-21	7180000		16600000
1995-06-22	7190000		16600000
1995-06-23	7210000		16600000
1995-06-24	7230000		16600000
1995-06-25	7250000		16700000
1995-06-26	7280000		16700000
1995-06-27	7300000		16800000
1995-06-28	7320000		16800000
1995-06-29	7340000		16900000
1995-06-30	7360000		16900000
1995-07-01	7380000		17000000
1995-07-02	7400000		17000000
1995-07-03	7440000		17100000
1995-07-04	7470000		17100000
1995-07-05	7500000		17100000
1995-07-06	7540000		17200000
1995-07-07	7570000		17200000
1995-07-08	7600000		17200000
1995-07-09	7630000		17200000
1995-07-10	7660000		17300000
1995-07-11	7680000		17300000
1995-07-12	7700000		17300000
1995-07-13	7720000		17300000
1995-07-14	7740000		17400000
1995-07-15	7770000		17400000
1995-07-16	7790000		17400000
1995-07-17	7820000		17400000
1995-07-18	7840000		17500000
1995-07-19	7860000		17500000
1995-07-20	7880000		17600000
1995-07-21	7900000		17600000
1995-07-22	7910000		17600000
1995-07-23	7930000		17700000
1995-07-24	7950000		17700000
1995-07-25	7960000		17700000
1995-07-26	7980000		17800000
1995-07-27	8000000		17800000
1995-07-28	8020000		17800000
1995-07-29	8030000		17800000
1995-07-30	8050000		17800000
1995-07-31	8070000		17900000
1995-08-01	8080000		17900000
1995-08-02	8100000		17900000
1995-08-03	8110000		17900000
1995-08-04	8120000		17900000
1995-08-05	8140000		17900000
1995-08-06	8150000		18000000
1995-08-07	8160000		18000000
1995-08-08	8170000		18000000
1995-08-09	8180000		18000000
1995-08-10	8190000		18000000
1995-08-11	8200000		18000000
1995-08-12	8210000		18100000
1995-08-13	8240000		18100000
1995-08-14	8300000		18100000
1995-08-15	8360000		18200000
1995-08-16	8420000		18400000
1995-08-17	8500000		18500000
1995-08-18	8570000		18700000
1995-08-19	8650000		18800000
1995-08-20	8720000		18900000
1995-08-21	8780000		19000000
1995-08-22	8840000		19100000
1995-08-23	8910000		19200000
1995-08-24	8970000		19200000
1995-08-25	9030000		19300000
1995-08-26	9090000		19300000
1995-08-27	9150000		19400000
1995-08-28	9210000		19400000
1995-08-29	9270000		19400000
1995-08-30	9330000		19500000
1995-08-31	9390000		19500000
1995-09-01	9450000		19600000
1995-09-02	9500000		19600000
1995-09-03	9560000		19600000
1995-09-04	9610000		19600000
1995-09-05	9660000		19700000
1995-09-06	9720000		19700000
1995-09-07	9770000		19700000
1995-09-08	9810000		19700000
1995-09-09	9860000		19800000
1995-09-10	9900000		19800000
1995-09-11	9940000		19800000
1995-09-12	9970000		19800000
1995-09-13	10000000		19800000
1995-09-14	10000000		19900000
1995-09-15	10100000		19900000
1995-09-16	10100000		19900000
1995-09-17	10100000		19900000
1995-09-18	10200000		19900000
1995-09-19	10200000		19900000
1995-09-20	10300000		20000000
1995-09-21	10300000		20000000
1995-09-22	10300000		20000000
1995-09-23	10400000		20000000
1995-09-24	10400000		20100000
1995-09-25	10400000		20100000
1995-09-26	10500000		20100000
1995-09-27	10500000		20100000
1995-09-28	10500000		20200000
1995-09-29	10600000		20200000
1995-09-30	10600000		20200000
1995-10-01	10700000		20200000
1995-10-02	10700000		20200000
1995-10-03	10800000		20300000
1995-10-04	10800000		20300000
1995-10-05	10800000		20300000
1995-10-06	10900000		20300000
1995-10-07	10900000		20300000
1995-10-08	10900000		20300000
1995-10-09	11000000		20400000
1995-10-10	11000000		20400000
1995-10-11	11000000		20400000
1995-10-12	11000000		20400000
1995-10-13	11100000		20400000
1995-10-14	11100000		20500000
1995-10-15	11100000		20500000
1995-10-16	11200000		20500000
1995-10-17	11200000		20500000
1995-10-18	11200000		20500000
1995-10-19	11200000		20500000
1995-10-20	11300000		20600000
1995-10-21	11300000		20600000
1995-10-22	11300000		20600000
1995-10-23	11300000		20600000
1995-10-24	11400000		20700000
1995-10-25	11400000		20700000
1995-10-26	11400000		20700000
1995-10-27	11400000		20700000
1995-10-28	11400000		20800000
1995-10-29	11500000		20800000
1995-10-30	11500000		20800000
1995-10-31	11500000		20800000
1995-11-01	11500000		20800000
1995-11-02	11500000		20800000
1995-11-03	11500000		20800000
1995-11-04	11500000		20800000
1995-11-05	11500000		20800000
1995-11-06	11500000		20800000
1995-11-07	11500000		20800000
1995-11-08	11500000		20800000
1995-11-09	11500000		20800000
1995-11-10	11500000		20800000
1995-11-11	11500000		20800000
1995-11-12	11500000		20800000
1995-11-13	11500000		20800000
1995-11-14	11500000		20800000
1995-11-15	11500000		20800000
1995-11-16	11500000		20800000
1995-11-17	11500000		20800000
1995-11-18	11500000		20800000
1995-11-19	11500000		20800000
1995-11-20	11500000		20800000
1995-11-21	11500000		20800000
1995-11-22	11500000		20800000
1995-11-23	11500000		20800000
1995-11-24	11500000		20800000
1995-11-25	11500000		20800000
1995-11-26	11500000		20800000
1995-11-27	11500000		20800000
1995-11-28	11500000		20800000
1995-11-29	11500000		20800000
1995-11-30	11500000		20800000
1995-12-01	11500000		20800000
1995-12-02	11500000		20800000
1995-12-03	11500000		20800000
1995-12-04	11500000		20800000
1995-12-05	11500000		20800000
1995-12-06	11500000		20800000
1995-12-07	11500000		20800000
1995-12-08	11500000		20800000
1995-12-09	11500000		20800000
1995-12-10	11500000		20800000
1995-12-11	11500000		20800000
1995-12-12	11500000		20800000
1995-12-13	11500000		20800000
1995-12-14	11500000		20800000
1995-12-15	11500000		20800000
1995-12-16	11500000		20800000
1995-12-17	11500000		20800000
1995-12-18	11500000		20800000
1995-12-19	11500000		20800000
1995-12-20	11500000		20800000
1995-12-21	11500000		20800000
1995-12-22	11500000		20800000
1995-12-23	11500000		20800000
1995-12-24	11500000		20800000
1995-12-25	11500000		20800000
1995-12-26	11500000		20800000
1995-12-27	11500000		20800000
1995-12-28	11500000		20800000
1995-12-29	11500000		20800000
1995-12-30	11500000		20800000
1995-12-31	11500000		20800000
1996-01-01	0		0
1996-01-02	0		0
1996-01-03	0		0
1996-01-04	0		0
1996-01-05	0		0
1996-01-06	0		0
1996-01-07	0		0
1996-01-08	0		0
1996-01-09	0		0
1996-01-10	0		0
1996-01-11	0		0
1996-01-12	0		0
1996-01-13	0		0
1996-01-14	0		0
1996-01-15	0		0
1996-01-16	0		0
1996-01-17	0		0
1996-01-18	0		0
1996-01-19	0		0
1996-01-20	0		0
1996-01-21	0		0
1996-01-22	0		0
1996-01-23	0		0
1996-01-24	0		0
1996-01-25	0		0
1996-01-26	0		0
1996-01-27	0		0
1996-01-28	0		0
1996-01-29	0		0
1996-01-30	0		0
1996-01-31	0		0
1996-02-01	0		0
1996-02-02	0		0
1996-02-03	0		0
1996-02-04	0		0
1996-02-05	0		0
1996-02-06	0		0
1996-02-07	0		0
1996-02-08	0		0
1996-02-09	0		0
1996-02-10	0		0
1996-02-11	0		0
1996-02-12	0		0
1996-02-13	0		0
1996-02-14	0		0
1996-02-15	0		0
1996-02-16	0		0
1996-02-17	0		0
1996-02-18	0		0
1996-02-19	0		0
1996-02-20	0		0
1996-02-21	0		0
1996-02-22	0		0
1996-02-23	0		0
1996-02-24	0		0
1996-02-25	0		0
1996-02-26	0		0
1996-02-27	0		0
1996-02-28	0		0
1996-02-29	0		0
1996-03-01	1300		12900
1996-03-02	2590		25800
1996-03-03	3890		38600
1996-03-04	5180		51400
1996-03-05	6480		64100
1996-03-06	7690		76800
1996-03-07	8900		89500
1996-03-08	10100		102000
1996-03-09	11300		115000
1996-03-10	12500		127000
1996-03-11	13800		140000
1996-03-12	15100		152000
1996-03-13	16400		164000
1996-03-14	17700		178000
1996-03-15	19000		213000
1996-03-16	20200		281000
1996-03-17	21400		367000
1996-03-18	22600		463000
1996-03-19	23800		563000
1996-03-20	25100		664000
1996-03-21	26200		763000
1996-03-22	27300		860000
1996-03-23	28400		952000
1996-03-24	29500		1040000
1996-03-25	30700		1120000
1996-03-26	31800		1200000
1996-03-27	32800		1280000
1996-03-28	33900		1340000
1996-03-29	34900		1410000
1996-03-30	35900		1470000
1996-03-31	37000		1520000
1996-04-01	38000		1580000
1996-04-02	39100		1630000
1996-04-03	40100		1670000
1996-04-04	41100		1710000
1996-04-05	42200		1750000
1996-04-06	43300		1790000
1996-04-07	44400		1830000
1996-04-08	45600		1860000
1996-04-09	47000		1890000
1996-04-10	48600		1920000
1996-04-11	50300		1960000
1996-04-12	51900		2040000
1996-04-13	53500		2190000
1996-04-14	55000		2400000
1996-04-15	56800		2620000
1996-04-16	61100		2860000
1996-04-17	78400		3100000
1996-04-18	129000		3360000
1996-04-19	221000		3690000
1996-04-20	339000		4190000
1996-04-21	490000		4830000
1996-04-22	675000		5490000
1996-04-23	971000		6120000
1996-04-24	1420000		6790000
1996-04-25	1990000		7650000
1996-04-26	2680000		8640000
1996-04-27	3510000		9600000
1996-04-28	4470000		10500000
1996-04-29	5640000		11400000
1996-04-30	6800000		12500000
1996-05-01	7890000		13600000
1996-05-02	8910000		14700000
1996-05-03	9860000		15600000
1996-05-04	10800000		16400000
1996-05-05	11600000		17100000
1996-05-06	12200000		17700000
1996-05-07	12600000		18100000
1996-05-08	12800000		18500000
1996-05-09	13000000		18800000
1996-05-10	13100000		19100000
1996-05-11	13200000		19300000
1996-05-12	13300000		19400000
1996-05-13	13300000		19600000
1996-05-14	13400000		19700000
1996-05-15	13400000		19800000
1996-05-16	13500000		19900000
1996-05-17	13600000		20000000
1996-05-18	13700000		20000000
1996-05-19	13900000		20100000
1996-05-20	14100000		20200000
1996-05-21	14200000		20300000
1996-05-22	14300000		20400000
1996-05-23	14400000		20500000
1996-05-24	14500000		20600000
1996-05-25	14500000		20700000
1996-05-26	14600000		20800000
1996-05-27	14600000		20800000
1996-05-28	14700000		20900000
1996-05-29	14700000		21000000
1996-05-30	14800000		21000000
1996-05-31	14800000		21100000
1996-06-01	14800000		21200000
1996-06-02	14900000		21200000
1996-06-03	14900000		21300000
1996-06-04	15000000		21300000
1996-06-05	15000000		21400000
1996-06-06	15000000		21500000
1996-06-07	15100000		21600000
1996-06-08	15100000		21600000
1996-06-09	15200000		21700000
1996-06-10	15200000		21800000
1996-06-11	15200000		21900000
1996-06-12	15300000		21900000
1996-06-13	15300000		22000000
1996-06-14	15300000		22100000
1996-06-15	15400000		22200000
1996-06-16	15400000		22200000
1996-06-17	15400000		22300000
1996-06-18	15400000		22400000
1996-06-19	15400000		22500000
1996-06-20	15500000		22600000
1996-06-21	15500000		22800000
1996-06-22	15500000		22900000
1996-06-23	15600000		23100000
1996-06-24	15600000		23200000
1996-06-25	15700000		23300000
1996-06-26	15700000		23400000
1996-06-27	15800000		23500000
1996-06-28	15800000		23600000
1996-06-29	15900000		23700000
1996-06-30	15900000		23800000
1996-07-01	16000000		23900000
1996-07-02	16000000		24000000
1996-07-03	16000000		24000000
1996-07-04	16100000		24100000
1996-07-05	16100000		24200000
1996-07-06	16100000		24200000
1996-07-07	16200000		24300000
1996-07-08	16200000		24400000
1996-07-09	16200000		24400000
1996-07-10	16300000		24500000
1996-07-11	16300000		24500000
1996-07-12	16300000		24600000
1996-07-13	16300000		24700000
1996-07-14	16400000		24700000
1996-07-15	16400000		24800000
1996-07-16	16400000		24800000
1996-07-17	16500000		24900000
1996-07-18	16500000		24900000
1996-07-19	16500000		24900000
1996-07-20	16600000		25000000
1996-07-21	16600000		25100000
1996-07-22	16600000		25200000
1996-07-23	16700000		25200000
1996-07-24	16700000		25300000
1996-07-25	16700000		25400000
1996-07-26	16700000		25500000
1996-07-27	16800000		25500000
1996-07-28	16800000		25600000
1996-07-29	16800000		25600000
1996-07-30	16900000		25700000
1996-07-31	16900000		25700000
1996-08-01	16900000		25800000
1996-08-02	16900000		25800000
1996-08-03	17000000		25800000
1996-08-04	17000000		25800000
1996-08-05	17000000		25900000
1996-08-06	17000000		25900000
1996-08-07	17100000		25900000
1996-08-08	17100000		25900000
1996-08-09	17100000		25900000
1996-08-10	17100000		25900000
1996-08-11	17200000		26000000
1996-08-12	17200000		26000000
1996-08-13	17200000		26000000
1996-08-14	17200000		26000000
1996-08-15	17200000		26000000
1996-08-16	17300000		26000000
1996-08-17	17300000		26000000
1996-08-18	17300000		26000000
1996-08-19	17300000		26000000
1996-08-20	17300000		26000000
1996-08-21	17400000		26100000
1996-08-22	17400000		26100000
1996-08-23	17400000		26100000
1996-08-24	17400000		26100000
1996-08-25	17400000		26100000
1996-08-26	17500000		26100000
1996-08-27	17500000		26100000
1996-08-28	17500000		26100000
1996-08-29	17500000		26100000
1996-08-30	17600000		26100000
1996-08-31	17600000		26100000
1996-09-01	17600000		26200000
1996-09-02	17600000		26200000
1996-09-03	17600000		26300000
1996-09-04	17700000		26400000
1996-09-05	17700000		26500000
1996-09-06	17700000		26600000
1996-09-07	17700000		26700000
1996-09-08	17800000		26800000
1996-09-09	17800000		26900000
1996-09-10	17800000		27000000
1996-09-11	17800000		27000000
1996-09-12	17900000		27100000
1996-09-13	17900000		27100000
1996-09-14	17900000		27200000
1996-09-15	17900000		27200000
1996-09-16	17900000		27200000
1996-09-17	17900000		27300000
1996-09-18	17900000		27300000
1996-09-19	17900000		27300000
1996-09-20	17900000		27300000
1996-09-21	18000000		27300000
1996-09-22	18000000		27400000
1996-09-23	18000000		27400000
1996-09-24	18000000		27400000
1996-09-25	18000000		27400000
1996-09-26	18100000		27400000
1996-09-27	18100000		27400000
1996-09-28	18100000		27500000
1996-09-29	18100000		27500000
1996-09-30	18100000		27500000
1996-10-01	18200000		27500000
1996-10-02	18200000		27600000
1996-10-03	18200000		27600000
1996-10-04	18200000		27600000
1996-10-05	18200000		27600000
1996-10-06	18300000		27600000
1996-10-07	18300000		27700000
1996-10-08	18300000		27700000
1996-10-09	18300000		27700000
1996-10-10	18300000		27700000
1996-10-11	18300000		27700000
1996-10-12	18400000		27700000
1996-10-13	18400000		27800000
1996-10-14	18400000		27800000
1996-10-15	18400000		27800000
1996-10-16	18400000		27800000
1996-10-17	18400000		27800000
1996-10-18	18500000		27800000
1996-10-19	18500000		27800000
1996-10-20	18500000		27900000
1996-10-21	18500000		27900000
1996-10-22	18500000		27900000
1996-10-23	18500000		27900000
1996-10-24	18600000		27900000
1996-10-25	18600000		27900000
1996-10-26	18600000		27900000
1996-10-27	18600000		28000000
1996-10-28	18700000		28000000
1996-10-29	18700000		28000000
1996-10-30	18700000		28000000
1996-10-31	18700000		28000000
1996-11-01	18700000		28000000
1996-11-02	18700000		28000000
1996-11-03	18700000		28000000
1996-11-04	18700000		28000000
1996-11-05	18700000		28000000
1996-11-06	18700000		28000000
1996-11-07	18700000		28000000
1996-11-08	18700000		28000000
1996-11-09	18700000		28000000
1996-11-10	18700000		28000000
1996-11-11	18700000		28000000
1996-11-12	18700000		28000000
1996-11-13	18700000		28000000
1996-11-14	18700000		28000000
1996-11-15	18700000		28000000
1996-11-16	18700000		28000000
1996-11-17	18700000		28000000
1996-11-18	18700000		28000000
1996-11-19	18700000		28000000
1996-11-20	18700000		28000000
1996-11-21	18700000		28000000
1996-11-22	18700000		28000000
1996-11-23	18700000		28000000
1996-11-24	18700000		28000000
1996-11-25	18700000		28000000
1996-11-26	18700000		28000000
1996-11-27	18700000		28000000
1996-11-28	18700000		28000000
1996-11-29	18700000		28000000
1996-11-30	18700000		28000000
1996-12-01	18700000		28000000
1996-12-02	18700000		28000000
1996-12-03	18700000		28000000
1996-12-04	18700000		28000000
1996-12-05	18700000		28000000
1996-12-06	18700000		28000000
1996-12-07	18700000		28000000
1996-12-08	18700000		28000000
1996-12-09	18700000		28000000
1996-12-10	18700000		28000000
1996-12-11	18700000		28000000
1996-12-12	18700000		28000000
1996-12-13	18700000		28000000
1996-12-14	18700000		28000000
1996-12-15	18700000		28000000
1996-12-16	18700000		28000000
1996-12-17	18700000		28000000
1996-12-18	18700000		28000000
1996-12-19	18700000		28000000
1996-12-20	18700000		28000000
1996-12-21	18700000		28000000
1996-12-22	18700000		28000000
1996-12-23	18700000		28000000
1996-12-24	18700000		28000000
1996-12-25	18700000		28000000
1996-12-26	18700000		28000000
1996-12-27	18700000		28000000
1996-12-28	18700000		28000000
1996-12-29	18700000		28000000
1996-12-30	18700000		28000000
1996-12-31	18700000		28000000
1997-01-01	0		0
1997-01-02	0		0
1997-01-03	0		0
1997-01-04	0		0
1997-01-05	0		0
1997-01-06	0		0
1997-01-07	0		0
1997-01-08	0		0
1997-01-09	0		0
1997-01-10	0		0
1997-01-11	0		0
1997-01-12	0		0
1997-01-13	0		0
1997-01-14	0		0
1997-01-15	0		0
1997-01-16	0		0
1997-01-17	0		0
1997-01-18	0		0
1997-01-19	0		0
1997-01-20	0		0
1997-01-21	0		0
1997-01-22	0		0
1997-01-23	0		0
1997-01-24	0		0
1997-01-25	0		0
1997-01-26	0		0
1997-01-27	0		0
1997-01-28	0		0
1997-01-29	0		0
1997-01-30	0		0
1997-01-31	0		0
1997-02-01	0		0
1997-02-02	0		0
1997-02-03	0		0
1997-02-04	0		0
1997-02-05	0		0
1997-02-06	0		0
1997-02-07	0		0
1997-02-08	0		0
1997-02-09	0		0
1997-02-10	0		0
1997-02-11	0		0
1997-02-12	0		0
1997-02-13	0		0
1997-02-14	0		0
1997-02-15	0		0
1997-02-16	0		0
1997-02-17	0		0
1997-02-18	0		0
1997-02-19	0		0
1997-02-20	0		0
1997-02-21	0		0
1997-02-22	0		0
1997-02-23	0		0
1997-02-24	0		0
1997-02-25	0		0
1997-02-26	0		0
1997-02-27	0		0
1997-02-28	0		0
1997-03-01	0		0
1997-03-02	0		0
1997-03-03	0		0
1997-03-04	0		0
1997-03-05	0		0
1997-03-06	0		0
1997-03-07	0		0
1997-03-08	0		0
1997-03-09	0		0
1997-03-10	0		0
1997-03-11	0		0
1997-03-12	0		0
1997-03-13	0		0
1997-03-14	0		0
1997-03-15	0		0
1997-03-16	0		0
1997-03-17	0		0
1997-03-18	0		0
1997-03-19	0		0
1997-03-20	0		0
1997-03-21	0		0
1997-03-22	0		0
1997-03-23	0		0
1997-03-24	0		0
1997-03-25	0		0
1997-03-26	0		0
1997-03-27	0		0
1997-03-28	0		0
1997-03-29	0		0
1997-03-30	0		0
1997-03-31	0		0
1997-04-01	0		0
1997-04-02	0		0
1997-04-03	0		0
1997-04-04	0		0
1997-04-05	0		0
1997-04-06	0		0
1997-04-07	0		0
1997-04-08	0		0
1997-04-09	0		0
1997-04-10	0		0
1997-04-11	0		0
1997-04-12	0		0
1997-04-13	0		0
1997-04-14	0		0
1997-04-15	0		0
1997-04-16	0		0
1997-04-17	0		0
1997-04-18	0		0
1997-04-19	0		0
1997-04-20	0		0
1997-04-21	0		0
1997-04-22	0		0
1997-04-23	0		0
1997-04-24	0		0
1997-04-25	0		0
1997-04-26	0		0
1997-04-27	0		0
1997-04-28	0		0
1997-04-29	0		0
1997-04-30	0		0
1997-05-01	0		0
1997-05-02	0		0
1997-05-03	0		0
1997-05-04	0		0
1997-05-05	0		0
1997-05-06	0		0
1997-05-07	0		0
1997-05-08	0		0
1997-05-09	0		0
1997-05-10	0		0
1997-05-11	0		0
1997-05-12	0		0
1997-05-13	0		0
1997-05-14	0		0
1997-05-15	0		0
1997-05-16	0		0
1997-05-17	0		0
1997-05-18	0		0
1997-05-19	0		0
1997-05-20	0		0
1997-05-21	0		0
1997-05-22	0		0
1997-05-23	0		0
1997-05-24	0		0
1997-05-25	0		0
1997-05-26	0		0
1997-05-27	0		0
1997-05-28	0		0
1997-05-29	0		0
1997-05-30	0		0
1997-05-31	0		0
1997-06-01	0		0
1997-06-02	0		0
1997-06-03	0		0
1997-06-04	0		0
1997-06-05	0		0
1997-06-06	0		0
1997-06-07	0		0
1997-06-08	0		0
1997-06-09	0		0
1997-06-10	0		0
1997-06-11	0		0
1997-06-12	0		0
1997-06-13	0		0
1997-06-14	0		0
1997-06-15	0		0
1997-06-16	0		0
1997-06-17	0		0
1997-06-18	0		0
1997-06-19	0		0
1997-06-20	0		0
[truncated: 5,977 more rows]
