# Supplementary material for: Simulating cold-region hydrology in an intensively drained agricultural watershed in Manitoba, Canada, using the Cold Regions Hydrological Model
Source: Copernicus journal article supplement (doi:10.5194/hess-2016-462), 2016-09-27
Supplement: Supplementary file 11 [file Cordeiro2016_PlotDataFig07.xlsx]

## Sheet: Sheet1
	Snow water equivalent (SWE; mm)
Date	Marquette Station	CRHM
1992-01-01	53.2	36.1142
1992-01-02	53.2	36.1142
1992-01-03	53.2	36.1073
1992-01-04	51.3	36.0869
1992-01-05	51.3	36.0312
1992-01-06	51.3	36.0858
1992-01-07	53.2	37.5948
1992-01-08	53.2	37.6239
1992-01-09	53.2	37.6218
1992-01-10	53.2	37.5859
1992-01-11	53.2	37.574
1992-01-12	51.3	37.5194
1992-01-13	51.3	37.3856
1992-01-14	51.3	37.3569
1992-01-15	51.3	37.6453
1992-01-16	51.3	39.0175
1992-01-17	57	39.8823
1992-01-18	57	40.0417
1992-01-19	62.7	42.8151
1992-01-20	62.7	42.8069
1992-01-21	62.7	42.8019
1992-01-22	62.7	43.5055
1992-01-23	66.5	44.328
1992-01-24	66.5	44.562
1992-01-25	68.4	44.8682
1992-01-26	68.4	44.8682
1992-01-27	68.4	44.8586
1992-01-28	68.4	44.6184
1992-01-29	66.5	44.5415
1992-01-30	66.5	43.4187
1992-01-31	64.6	44.4816
1992-02-01	64.6	44.4804
1992-02-02	64.6	43.3315
1992-02-03	62.7	44.4395
1992-02-04	62.7	44.4705
1992-02-05	62.7	44.4089
1992-02-06	60.8	42.3361
1992-02-07	60.8	44.1436
1992-02-08	60.8	44.1427
1992-02-09	60.8	44.14
1992-02-10	58.9	44.0948
1992-02-11	58.9	44.0868
1992-02-12	58.9	44.2168
1992-02-13	58.9	44.8868
1992-02-14	58.9	45.1447
1992-02-15	57	45.4868
1992-02-16	57	45.4868
1992-02-17	57	46.191
1992-02-18	58.9	46.6621
1992-02-19	58.9	47.0214
1992-02-20	72.2	54.0947
1992-02-21	72.2	55.9695
1992-02-22	72.2	56.6962
1992-02-23	72.2	57.3962
1992-02-24	72.2	58.5358
1992-02-25	70.3	59.9668
1992-02-26	70.3	59.9234
1992-02-27	70.3	59.9191
1992-02-28	68.4	54.0552
1992-02-29	68.4	54.8469
1992-03-01	66.5	42.9808
1992-03-02	66.5	31.2713
1992-03-03	64.6	33.4204
1992-03-04	64.6	26.3473
1992-03-05	62.7	30.4244
1992-03-06	57	31.2602
1992-03-07	53.2	31.6775
1992-03-08	53.2	31.7212
1992-03-09	53.2	31.7197
1992-03-10	53.2	32.8263
1992-03-11	51.3	33.652
1992-03-12	51.3	34.2128
1992-03-13	55.1	35.6514
1992-03-14	55.1	35.6474
1992-03-15	53.2	35.6302
1992-03-16	53.2	35.5999
1992-03-17	51.3	35.5746
1992-03-18	51.3	35.5746
1992-03-19	49.4	34.0261
1992-03-20	49.4	35.5746
1992-03-21	47.5	35.5746
1992-03-22	45.6	29.791
1992-03-23	41.8	7.835
1992-03-24	38	0.7201
1992-03-25	41.8	2.1645
1992-03-26	38	2.1373
1992-03-27	34.2	2.1145
1992-03-28	30.4	0
1992-03-29	26.6	0
1992-03-30	20.9	0
1992-03-31	19	0
1992-04-01	17.1	0
1992-04-02	15.2	0
1992-04-03	11.4	0
1992-04-04	7.6	0
1992-04-05	5.7	0
1992-04-06	1.9	0
1992-04-07	0	0
1992-04-08	0	0
1992-04-09	0	0
1992-04-10	0	3.7593
1992-04-11	5.7	3.0738
1992-04-12	0	2.6044
1992-04-13	0	2.7877
1992-04-14	0	2.1626
1992-04-15	0	0
1992-04-16	0	0
1992-04-17	0	0
1992-04-18	0	2.6467e-06
1992-04-19	0	1.4566
1992-04-20	0	2.5381
1992-04-21	0	2.749
1992-04-22	0	3.9965
1992-04-23	0	3.9965
1992-04-24	0	2.4479
1992-04-25	0	0
1992-04-26	0	0
1992-04-27	0	0
1992-04-28	0	0
1992-04-29	0	0
1992-04-30	0	0
1992-05-01	0	0
1992-05-02	0	0
1992-05-03	0	0
1992-05-04	0	0
1992-05-05	0	0
1992-05-06	0	0
1992-05-07	0	2.2352e-10
1992-05-08	0	2.8008e-07
1992-05-09	0	0
1992-05-10	0	2.936e-06
1992-05-11	0	0
1992-05-12	0	0
1992-05-13	0	6.8608e-07
1992-05-14	0	9.2822e-05
1992-05-15	0	0.0049057
1992-05-16	0	0
1992-05-17	0	0
1992-05-18	0	0
1992-05-19	0	0
1992-05-20	0	0
1992-05-21	0	0
1992-05-22	0	0
1992-05-23	0	0
1992-05-24	0	0
1992-05-25	0	0
1992-05-26	0	0
1992-05-27	0	0
1992-05-28	0	0
1992-05-29	0	0
1992-05-30	0	0
1992-05-31	0	0
1992-06-01	0	0
1992-06-02	0	0
1992-06-03	0	0
1992-06-04	0	0
1992-06-05	0	9.4261e-06
1992-06-06	0	5.9122e-05
1992-06-07	0	0
1992-06-08	0	0
1992-06-09	0	0
1992-06-10	0	0
1992-06-11	0	0
1992-06-12	0	0
1992-06-13	0	0
1992-06-14	0	0
1992-06-15	0	0
1992-06-16	0	0
1992-06-17	0	0
1992-06-18	0	0
1992-06-19	0	0
1992-06-20	0	0
1992-06-21	0	1.4107e-07
1992-06-22	0	0
1992-06-23	0	0
1992-06-24	0	0
1992-06-25	0	0
1992-06-26	0	0
1992-06-27	0	0
1992-06-28	0	0
1992-06-29	0	0
1992-06-30	0	0
1992-07-01	0	0
1992-07-02	0	0
1992-07-03	0	0
1992-07-04	0	0
1992-07-05	0	0
1992-07-06	0	0
1992-07-07	0	0
1992-07-08	0	0
1992-07-09	0	0
1992-07-10	0	0
1992-07-11	0	0
1992-07-12	0	0
1992-07-13	0	0
1992-07-14	0	0
1992-07-15	0	0
1992-07-16	0	0
1992-07-17	0	0
1992-07-18	0	0
1992-07-19	0	0
1992-07-20	0	0
1992-07-21	0	0
1992-07-22	0	0
1992-07-23	0	0
1992-07-24	0	0
1992-07-25	0	0
1992-07-26	0	0
1992-07-27	0	0
1992-07-28	0	0
1992-07-29	0	0
1992-07-30	0	0
1992-07-31	0	0
1992-08-01	0	0
1992-08-02	0	0
1992-08-03	0	0
1992-08-04	0	0
1992-08-05	0	0
1992-08-06	0	0
1992-08-07	0	0
1992-08-08	0	0
1992-08-09	0	0
1992-08-10	0	0
1992-08-11	0	0
1992-08-12	0	0
1992-08-13	0	0
1992-08-14	0	0
1992-08-15	0	0
1992-08-16	0	0
1992-08-17	0	0
1992-08-18	0	0
1992-08-19	0	0
1992-08-20	0	0
1992-08-21	0	0
1992-08-22	0	0
1992-08-23	0	0
1992-08-24	0	0
1992-08-25	0	0
1992-08-26	0	0
1992-08-27	0	0
1992-08-28	0	0
1992-08-29	0	0
1992-08-30	0	0
1992-08-31	0	0
1992-09-01	0	0
1992-09-02	0	0
1992-09-03	0	0
1992-09-04	0	0
1992-09-05	0	0
1992-09-06	0	0
1992-09-07	0	0
1992-09-08	0	0
1992-09-09	0	1.1176e-09
1992-09-10	0	0
1992-09-11	0	0
1992-09-12	0	0
1992-09-13	0	0
1992-09-14	0	0
1992-09-15	0	8.2912e-05
1992-09-16	0	0.00016112
1992-09-17	0	3.3498e-07
1992-09-18	0	0
1992-09-19	0	0
1992-09-20	0	0
1992-09-21	0	0
1992-09-22	0	0
1992-09-23	0	0
1992-09-24	0	0
1992-09-25	0	0
1992-09-26	0	0
1992-09-27	0	0.7947
1992-09-28	0	1.0541
1992-09-29	0	0
1992-09-30	0	0
1992-10-01	0	0
1992-10-02	0	0
1992-10-03	0	0
1992-10-04	0	0
1992-10-05	0	0
1992-10-06	0	0
1992-10-07	0	0
1992-10-08	0	0
1992-10-09	0	0
1992-10-10	0	0
1992-10-11	0	3.4626e-11
1992-10-12	0	0
1992-10-13	0	0
1992-10-14	0	0
1992-10-15	0	0
1992-10-16	0	0
1992-10-17	0	0
1992-10-18	0	0.0263
1992-10-19	1.9	1.7693
1992-10-20	0	1.7728
1992-10-21	0	0
1992-10-22	0	0
1992-10-23	0	0
1992-10-24	0	0
1992-10-25	0	0
1992-10-26	0	0
1992-10-27	0	0
1992-10-28	0	0
1992-10-29	0	0
1992-10-30	0	0
1992-10-31	0	0
1992-11-01	0	0
1992-11-02	0	0.3747
1992-11-03	7.6	5.01
1992-11-04	11.4	5.2407
1992-11-05	11.4	5.2167
1992-11-06	11.4	5.2164
1992-11-07	11.4	5.0958
1992-11-08	11.4	7.5742
1992-11-09	17.1	13.3469
1992-11-10	45.6	17.0212
1992-11-11	45.6	17.0516
1992-11-12	45.6	17.1959
1992-11-13	41.8	17.1493
1992-11-14	41.8	17.1485
1992-11-15	39.9	19.5918
1992-11-16	53.2	25.0418
1992-11-17	53.2	25.1085
1992-11-18	53.2	25.1085
1992-11-19	51.3	26.8626
1992-11-20	60.8	33.1234
1992-11-21	68.4	34.6636
1992-11-22	68.4	34.6636
1992-11-23	66.5	35.1424
1992-11-24	68.4	36.0627
1992-11-25	68.4	36.0627
1992-11-26	64.6	36.0627
1992-11-27	64.6	36.0624
1992-11-28	64.6	36.0604
1992-11-29	64.6	35.988
1992-11-30	64.6	35.9451
1992-12-01	64.6	35.8616
1992-12-02	64.6	35.735
1992-12-03	62.7	36.3683
1992-12-04	62.7	36.5306
1992-12-05	62.7	36.334
1992-12-06	62.7	36.2789
1992-12-07	60.8	36.2789
1992-12-08	60.8	36.2443
1992-12-09	60.8	36.1874
1992-12-10	60.8	36.0393
1992-12-11	60.8	35.9486
1992-12-12	58.9	41.8602
1992-12-13	81.7	50.223
1992-12-14	98.8	57.6666
1992-12-15	98.8	58.2257
1992-12-16	100.7	58.3402
1992-12-17	100.7	59.3508
1992-12-18	102.6	62.1225
1992-12-19	104.5	63.2334
1992-12-20	104.5	64.233
1992-12-21	108.3	65.9207
1992-12-22	108.3	65.8716
1992-12-23	108.3	66.0952
1992-12-24	110.2	68.7666
1992-12-25	114	62.4338
1992-12-26	114	62.1531
1992-12-27	112.1	62.1364
1992-12-28	112.1	62.0075
1992-12-29	114	67.3675
1992-12-30	123.5	70.2332
1992-12-31	123.5	70.038
1993-01-01	123.5	70.0375
1993-01-02	121.6	70.032
1993-01-03	121.6	70.031
1993-01-04	119.7	70.031
1993-01-05	119.7	70.0305
1993-01-06	119.7	69.9894
1993-01-07	117.8	69.9709
1993-01-08	117.8	69.9709
1993-01-09	117.8	71.1059
1993-01-10	121.6	75.8573
1993-01-11	125.4	76.9775
1993-01-12	125.4	77.524
1993-01-13	125.4	77.5722
1993-01-14	123.5	77.5722
1993-01-15	123.5	77.5359
1993-01-16	123.5	77.3915
1993-01-17	121.6	77.3904
1993-01-18	121.6	77.3904
1993-01-19	119.7	77.2751
1993-01-20	119.7	76.2949
1993-01-21	117.8	75.8276
1993-01-22	117.8	75.8033
1993-01-23	115.9	75.8033
1993-01-24	115.9	75.8033
1993-01-25	114	79.1015
1993-01-26	121.6	80.3579
1993-01-27	125.4	81.7945
1993-01-28	125.4	85.2815
1993-01-29	121.6	84.2692
1993-01-30	121.6	83.167
1993-01-31	102.6	83.167
1993-02-01	93.1	83.1569
1993-02-02	85.5	83.1064
1993-02-03	83.6	83.1064
1993-02-04	83.6	83.0976
1993-02-05	83.6	83.0942
1993-02-06	81.7	83.0942
1993-02-07	81.7	83.0942
1993-02-08	81.7	83.081
1993-02-09	81.7	82.9892
1993-02-10	81.7	82.9485
1993-02-11	81.7	82.9485
1993-02-12	81.7	82.9485
1993-02-13	81.7	82.9479
1993-02-14	81.7	82.947
1993-02-15	79.8	82.947
1993-02-16	79.8	82.947
1993-02-17	79.8	82.946
1993-02-18	79.8	82.941
1993-02-19	77.9	82.941
1993-02-20	77.9	82.941
1993-02-21	77.9	83.1801
1993-02-22	76	83.1922
1993-02-23	76	83.1915
1993-02-24	74.1	83.1855
1993-02-25	74.1	83.1551
1993-02-26	72.2	83.1466
1993-02-27	70.3	83.1185
1993-02-28	68.4	83.1185
1993-03-01	64.6	82.9926
1993-03-02	60.8	74.2937
1993-03-03	57	68.0918
1993-03-04	55.1	71.9499
1993-03-05	51.3	63.1803
1993-03-06	49.4	57.6772
1993-03-07	47.5	48.9414
1993-03-08	45.6	42.8245
1993-03-09	45.6	37.0246
1993-03-10	49.4	41.272
1993-03-11	49.4	41.2407
1993-03-12	47.5	41.1989
1993-03-13	47.5	41.1757
1993-03-14	47.5	43.1757
1993-03-15	45.6	44.3875
1993-03-16	51.3	46.3642
1993-03-17	51.3	46.2971
1993-03-18	49.4	45.7873
1993-03-19	49.4	43.2259
1993-03-20	47.5	43.0866
1993-03-21	47.5	43.0866
1993-03-22	45.6	42.9869
1993-03-23	43.7	42.6934
1993-03-24	39.9	34.7721
1993-03-25	36.1	11.0951
1993-03-26	32.3	0.00048354
1993-03-27	28.5	0.4256
1993-03-28	26.6	0.6692
1993-03-29	24.7	0
1993-03-30	22.8	0
1993-03-31	22.8	0
1993-04-01	20.9	0
1993-04-02	19	0
1993-04-03	15.2	0
1993-04-04	11.4	0
1993-04-05	7.6	0
1993-04-06	5.7	0
1993-04-07	3.8	0
1993-04-08	0	0
1993-04-09	0	0
1993-04-10	0	0
1993-04-11	0	0
1993-04-12	0	0.0119
1993-04-13	0	0
1993-04-14	0	0
1993-04-15	0	0
1993-04-16	0	0
1993-04-17	0	0
1993-04-18	0	0
1993-04-19	0	0
1993-04-20	0	0
1993-04-21	0	0
1993-04-22	0	0
1993-04-23	0	0
1993-04-24	0	0
1993-04-25	0	0
1993-04-26	0	0.2532
1993-04-27	0	0.2818
1993-04-28	0	0.4128
1993-04-29	0	0.0052696
1993-04-30	0	0
1993-05-01	0	0
1993-05-02	0	0
1993-05-03	0	0
1993-05-04	0	0
1993-05-05	0	0
1993-05-06	0	0
1993-05-07	0	0
1993-05-08	0	0
1993-05-09	0	0
1993-05-10	0	0
1993-05-11	0	0
1993-05-12	0	0
1993-05-13	0	0
1993-05-14	0	2.7114e-08
1993-05-15	5.7	0.0338
1993-05-16	0	0.1017
1993-05-17	0	0
1993-05-18	0	0
1993-05-19	0	0
1993-05-20	0	0
1993-05-21	0	0
1993-05-22	0	0
1993-05-23	0	0
1993-05-24	0	0
1993-05-25	0	3.7967e-05
1993-05-26	0	0
1993-05-27	0	4.2142e-05
1993-05-28	0	0
1993-05-29	0	0
1993-05-30	0	0
1993-05-31	0	0
1993-06-01	0	0
1993-06-02	0	0
1993-06-03	0	0
1993-06-04	0	0
1993-06-05	0	0
1993-06-06	0	0
1993-06-07	0	0
1993-06-08	0	0
1993-06-09	0	0
1993-06-10	0	0
1993-06-11	0	0
1993-06-12	0	0
1993-06-13	0	0
1993-06-14	0	0
1993-06-15	0	1.2765e-07
1993-06-16	0	0
1993-06-17	0	0
1993-06-18	0	0
1993-06-19	0	0
1993-06-20	0	0
1993-06-21	0	0
1993-06-22	0	0
1993-06-23	0	0
1993-06-24	0	0
1993-06-25	0	0
1993-06-26	0	0
1993-06-27	0	0
1993-06-28	0	0
1993-06-29	0	0
1993-06-30	0	0
1993-07-01	0	0
1993-07-02	0	0
1993-07-03	0	0
1993-07-04	0	0
1993-07-05	0	0
1993-07-06	0	0
1993-07-07	0	0
1993-07-08	0	0
1993-07-09	0	0
1993-07-10	0	0
1993-07-11	0	0
1993-07-12	0	0
1993-07-13	0	0
1993-07-14	0	0
1993-07-15	0	0
1993-07-16	0	0
1993-07-17	0	0
1993-07-18	0	0
1993-07-19	0	0
1993-07-20	0	0
1993-07-21	0	0
1993-07-22	0	0
1993-07-23	0	0
1993-07-24	0	0
1993-07-25	0	0
1993-07-26	0	0
1993-07-27	0	0
1993-07-28	0	0
1993-07-29	0	0
1993-07-30	0	0
1993-07-31	0	0
1993-08-01	0	0
1993-08-02	0	0
1993-08-03	0	0
1993-08-04	0	0
1993-08-05	0	0
1993-08-06	0	0
1993-08-07	0	0
1993-08-08	0	0
1993-08-09	0	0
1993-08-10	0	0
1993-08-11	0	0
1993-08-12	0	0
1993-08-13	0	0
1993-08-14	0	0
1993-08-15	0	0
1993-08-16	0	0
1993-08-17	0	0
1993-08-18	0	0
1993-08-19	0	0
1993-08-20	0	0
1993-08-21	0	0
1993-08-22	0	0
1993-08-23	0	0
1993-08-24	0	0
1993-08-25	0	0
1993-08-26	0	0
1993-08-27	0	0
1993-08-28	0	0
1993-08-29	0	0
1993-08-30	0	0
1993-08-31	0	0
1993-09-01	0	0
1993-09-02	0	0
1993-09-03	0	0
1993-09-04	0	0
1993-09-05	0	9.8795e-07
1993-09-06	0	0
1993-09-07	0	0
1993-09-08	0	0
1993-09-09	0	0
1993-09-10	0	0
1993-09-11	0	0
1993-09-12	0	0
1993-09-13	0	0
1993-09-14	0	0
1993-09-15	0	0
1993-09-16	0	3.8068e-06
1993-09-17	0	0
1993-09-18	0	0
1993-09-19	0	0
1993-09-20	0	0
1993-09-21	0	7.4506e-10
1993-09-22	0	0
1993-09-23	0	0
1993-09-24	0	0
1993-09-25	0	0
1993-09-26	0	0.00048798
1993-09-27	0	0
1993-09-28	0	0
1993-09-29	0	0.919
1993-09-30	0	3.9776e-06
1993-10-01	0	0.6798
1993-10-02	0	1.3979
1993-10-03	0	0
1993-10-04	0	0
1993-10-05	0	0
1993-10-06	0	0
1993-10-07	0	0
1993-10-08	0	0
1993-10-09	0	0
1993-10-10	0	0
1993-10-11	0	0
1993-10-12	0	0
1993-10-13	0	0
1993-10-14	0	0
1993-10-15	0	1.2897e-05
1993-10-16	0	0.3354
1993-10-17	0	0.4031
1993-10-18	0	0
1993-10-19	0	2.6524e-08
1993-10-20	0	0.0096682
1993-10-21	0	0.6135
1993-10-22	0	0.627
1993-10-23	0	0
1993-10-24	0	0
1993-10-25	0	0.00025437
1993-10-26	0	0
1993-10-27	0	0.9832
1993-10-28	9.5	0.6101
1993-10-29	5.7	0
1993-10-30	3.8	0
1993-10-31	1.9	0
1993-11-01	0	0.0061564
1993-11-02	0	0
1993-11-03	0	0
1993-11-04	0	0
1993-11-05	0	0.2479
1993-11-06	0	0.6
1993-11-07	0	0
1993-11-08	0	1.8717
1993-11-09	0	2.6
1993-11-10	0	2.6
1993-11-11	0	2.6
1993-11-12	0	2.5934
1993-11-13	0	2.5932
1993-11-14	0	2.5932
1993-11-15	0	2.5932
1993-11-16	0	2.581
1993-11-17	0	0.6412
1993-11-18	0	0.6655
1993-11-19	0	0
1993-11-20	0	0
1993-11-21	0	0
1993-11-22	0	0
1993-11-23	0	0
1993-11-24	0	0
1993-11-25	0	1.1917
1993-11-26	1.9	6.2686
1993-11-27	26.6	15.3872
1993-11-28	26.6	15.1438
1993-11-29	24.7	14.7749
1993-11-30	20.9	14.7677
1993-12-01	22.8	15.9886
1993-12-02	22.8	15.9886
1993-12-03	22.8	15.9886
1993-12-04	22.8	15.9886
1993-12-05	20.9	15.9493
1993-12-06	20.9	15.9088
1993-12-07	20.9	15.9088
1993-12-08	20.9	15.9088
1993-12-09	19	15.9085
1993-12-10	19	15.9062
1993-12-11	19	15.9062
1993-12-12	17.1	15.9062
1993-12-13	17.1	15.9062
1993-12-14	17.1	15.9062
1993-12-15	15.2	15.9062
1993-12-16	15.2	15.9062
1993-12-17	15.2	15.9062
1993-12-18	15.2	15.9062
1993-12-19	15.2	16.7931
1993-12-20	17.1	17.4261
1993-12-21	19	19.1407
1993-12-22	24.7	19.724
1993-12-23	24.7	19.7237
1993-12-24	24.7	19.6019
1993-12-25	22.8	19.2173
1993-12-26	22.8	19.2173
1993-12-27	22.8	19.2173
1993-12-28	22.8	19.1857
1993-12-29	28.5	20.5325
1993-12-30	28.5	20.3831
1993-12-31	28.5	20.3695
1994-01-01	28.5	20.7661
1994-01-02	28.5	21.1544
1994-01-03	28.5	21.2773
1994-01-04	30.4	22.1454
1994-01-05	30.4	23.4498
1994-01-06	34.2	24.9598
1994-01-07	34.2	25.8756
1994-01-08	36.1	25.9173
1994-01-09	36.1	26.0361
1994-01-10	36.1	25.9836
1994-01-11	34.2	29.1303
1994-01-12	36.1	32.5105
1994-01-13	36.1	32.5046
1994-01-14	36.1	32.5024
1994-01-15	36.1	33.1449
1994-01-16	36.1	33.6026
1994-01-17	36.1	33.6746
1994-01-18	36.1	33.6634
1994-01-19	36.1	33.6633
1994-01-20	36.1	33.6317
1994-01-21	34.2	33.5635
1994-01-22	34.2	33.5634
1994-01-23	34.2	33.5633
1994-01-24	34.2	33.5633
1994-01-25	34.2	33.5633
1994-01-26	34.2	33.5976
1994-01-27	36.1	34.6822
1994-01-28	36.1	34.6859
1994-01-29	36.1	34.6157
1994-01-30	36.1	34.6152
1994-01-31	36.1	34.6513
1994-02-01	36.1	35.0541
1994-02-02	36.1	34.6653
1994-02-03	36.1	33.7181
1994-02-04	36.1	33.6379
1994-02-05	36.1	33.6025
1994-02-06	34.2	33.6024
1994-02-07	34.2	33.6441
1994-02-08	34.2	33.8024
1994-02-09	34.2	33.7943
1994-02-10	34.2	33.6469
1994-02-11	34.2	33.6456
1994-02-12	32.3	33.6456
1994-02-13	32.3	33.6456
1994-02-14	32.3	33.8139
1994-02-15	32.3	33.7001
1994-02-16	32.3	31.537
1994-02-17	32.3	31.4357
1994-02-18	32.3	29.9631
1994-02-19	34.2	30.4035
1994-02-20	34.2	31.4632
1994-02-21	34.2	31.4611
1994-02-22	34.2	31.4611
1994-02-23	34.2	31.4608
1994-02-24	34.2	31.7709
1994-02-25	38	33.5754
1994-02-26	38	33.5473
1994-02-27	38	33.5473
1994-02-28	38	33.5473
1994-03-01	38	35.8983
1994-03-02	36.1	37.528
1994-03-03	30.4	37.5194
1994-03-04	26.6	32.4216
1994-03-05	22.8	22.8654
1994-03-06	19	7.0265
1994-03-07	17.1	0
1994-03-08	17.1	0
1994-03-09	17.1	0.0145
1994-03-10	17.1	0.0116
1994-03-11	17.1	0
1994-03-12	15.2	0
1994-03-13	11.4	0
1994-03-14	9.5	0
1994-03-15	5.7	0
1994-03-16	5.7	0
1994-03-17	3.8	0
1994-03-18	1.9	0
1994-03-19	0	1.5857
1994-03-20	0	2.0568
1994-03-21	0	0.3871
1994-03-22	0	0.571
1994-03-23	0	0.571
1994-03-24	0	0
1994-03-25	0	0
1994-03-26	0	0
1994-03-27	0	0
1994-03-28	0	0
1994-03-29	0	0
1994-03-30	0	0
1994-03-31	0	0
1994-04-01	0	0.8843
1994-04-02	13.3	1.4192
1994-04-03	3.8	0
1994-04-04	0	0
1994-04-05	0	0
1994-04-06	0	0
1994-04-07	0	0
1994-04-08	0	0.0356
1994-04-09	0	0
1994-04-10	0	0
1994-04-11	0	0
1994-04-12	0	0
1994-04-13	0	0
1994-04-14	0	2.3553e-07
1994-04-15	0	0
1994-04-16	0	0
1994-04-17	0	0
1994-04-18	0	0
1994-04-19	0	0
1994-04-20	0	0
1994-04-21	0	0
1994-04-22	0	0
1994-04-23	0	0
1994-04-24	0	0
1994-04-25	0	0
1994-04-26	0	0
1994-04-27	0	0
1994-04-28	0	0
1994-04-29	0	0
1994-04-30	0	0
1994-05-01	0	0
1994-05-02	0	0
1994-05-03	0	4.0626e-05
1994-05-04	0	0
1994-05-05	0	0
1994-05-06	0	0
1994-05-07	0	0
1994-05-08	0	0
1994-05-09	0	0
1994-05-10	0	0
1994-05-11	0	0
1994-05-12	0	5.4638e-10
1994-05-13	0	0
1994-05-14	0	0
1994-05-15	0	0
1994-05-16	0	0
1994-05-17	0	2.5609e-08
1994-05-18	0	0
1994-05-19	0	2.4835e-08
1994-05-20	0	0
1994-05-21	0	0
1994-05-22	0	0
1994-05-23	0	0
1994-05-24	0	0
1994-05-25	0	0
1994-05-26	0	0
1994-05-27	0	0
1994-05-28	0	0
1994-05-29	0	0
1994-05-30	0	0
1994-05-31	0	0
1994-06-01	0	0
1994-06-02	0	0
1994-06-03	0	0
1994-06-04	0	0
1994-06-05	0	0
1994-06-06	0	0
1994-06-07	0	0
1994-06-08	0	0
1994-06-09	0	9.2015e-07
1994-06-10	0	0
1994-06-11	0	0
1994-06-12	0	0
1994-06-13	0	0
1994-06-14	0	0
1994-06-15	0	0
1994-06-16	0	0
1994-06-17	0	0
1994-06-18	0	0
1994-06-19	0	0
1994-06-20	0	0
1994-06-21	0	0
1994-06-22	0	0
1994-06-23	0	0
1994-06-24	0	0
1994-06-25	0	0
1994-06-26	0	0
1994-06-27	0	0
1994-06-28	0	0
1994-06-29	0	0
1994-06-30	0	0
1994-07-01	0	0
1994-07-02	0	0
1994-07-03	0	0
1994-07-04	0	0
1994-07-05	0	0
1994-07-06	0	0
1994-07-07	0	0
1994-07-08	0	0
1994-07-09	0	0
1994-07-10	0	0
1994-07-11	0	0
1994-07-12	0	0
1994-07-13	0	0
1994-07-14	0	0
1994-07-15	0	0
1994-07-16	0	0
1994-07-17	0	0
1994-07-18	0	0
1994-07-19	0	0
1994-07-20	0	0
1994-07-21	0	0
1994-07-22	0	0
1994-07-23	0	0
1994-07-24	0	0
1994-07-25	0	0
1994-07-26	0	0
1994-07-27	0	0
1994-07-28	0	0
1994-07-29	0	0
1994-07-30	0	0
1994-07-31	0	0
1994-08-01	0	0
1994-08-02	0	0
1994-08-03	0	0
1994-08-04	0	0
1994-08-05	0	0
1994-08-06	0	0
1994-08-07	0	0
1994-08-08	0	0
1994-08-09	0	0
1994-08-10	0	0
1994-08-11	0	0
1994-08-12	0	0
1994-08-13	0	0
1994-08-14	0	0
1994-08-15	0	0
1994-08-16	0	0
1994-08-17	0	0
1994-08-18	0	0
1994-08-19	0	0
1994-08-20	0	0
1994-08-21	0	0
1994-08-22	0	0
1994-08-23	0	0
1994-08-24	0	0
1994-08-25	0	0
1994-08-26	0	0
1994-08-27	0	0
1994-08-28	0	0
1994-08-29	0	0
1994-08-30	0	0
1994-08-31	0	0
1994-09-01	0	0
1994-09-02	0	0
1994-09-03	0	0.0079001
1994-09-04	0	0
1994-09-05	0	0
1994-09-06	0	0
1994-09-07	0	0
1994-09-08	0	0
1994-09-09	0	0
1994-09-10	0	0
1994-09-11	0	0
1994-09-12	0	0
1994-09-13	0	0
1994-09-14	0	0
1994-09-15	0	0
1994-09-16	0	0
1994-09-17	0	0
1994-09-18	0	0
1994-09-19	0	0
1994-09-20	0	0
1994-09-21	0	7.9652e-06
1994-09-22	0	0.00058545
1994-09-23	0	0
1994-09-24	0	0
1994-09-25	0	0
1994-09-26	0	0
1994-09-27	0	0
1994-09-28	0	0
1994-09-29	0	0
1994-09-30	0	0
1994-10-01	0	0
1994-10-02	0	0
1994-10-03	0	0
1994-10-04	0	0
1994-10-05	0	0
1994-10-06	0	0
1994-10-07	0	0
1994-10-08	0	1.38e-05
1994-10-09	0	0
1994-10-10	0	0
1994-10-11	0	0
1994-10-12	0	0
1994-10-13	0	0
1994-10-14	0	0
1994-10-15	0	1.2286e-09
1994-10-16	0	0
1994-10-17	0	0
1994-10-18	0	0
1994-10-19	0	9.8108e-11
1994-10-20	0	0
1994-10-21	0	0
1994-10-22	0	0
1994-10-23	0	0
1994-10-24	0	0
1994-10-25	0	0
1994-10-26	0	0
1994-10-27	0	8.7089e-05
1994-10-28	0	0
1994-10-29	0	0
1994-10-30	0	0
1994-10-31	0	0
1994-11-01	0	1.7685
1994-11-02	0	2.0744
1994-11-03	0	2.6277
1994-11-04	0	2.7365
1994-11-05	0	2.7289
1994-11-06	0	1.048
1994-11-07	0	1.055
1994-11-08	0	0
1994-11-09	0	0
1994-11-10	0	0
1994-11-11	0	0.0082601
1994-11-12	0	0
1994-11-13	0	0.0187
1994-11-14	0	0
1994-11-15	0	0
1994-11-16	0	0
1994-11-17	0	0.703
1994-11-18	13.3	4.4065
1994-11-19	13.3	4.2816
1994-11-20	13.3	4.2816
1994-11-21	11.4	2.2274
1994-11-22	11.4	1.2194
1994-11-23	9.5	1.2688
1994-11-24	9.5	1.2521
1994-11-25	7.6	1.2132
1994-11-26	7.6	3.8024
1994-11-27	15.2	5.0766
1994-11-28	15.2	5.056
1994-11-29	13.3	5.0379
1994-11-30	13.3	5.0064
1994-12-01	11.4	4.8368
1994-12-02	7.6	0.9074
1994-12-03	7.6	4.273
1994-12-04	15.2	5.6789
1994-12-05	15.2	6.0429
1994-12-06	15.2	6.0429
1994-12-07	15.2	7.2608
1994-12-08	17.1	7.853
1994-12-09	17.1	7.8516
1994-12-10	17.1	7.8422
1994-12-11	17.1	7.8284
1994-12-12	17.1	7.8143
1994-12-13	17.1	7.8143
1994-12-14	17.1	7.8143
1994-12-15	17.1	8.3393
1994-12-16	22.8	10.8143
1994-12-17	22.8	10.814
1994-12-18	22.8	10.8137
1994-12-19	22.8	10.812
1994-12-20	22.8	10.8011
1994-12-21	22.8	10.7138
1994-12-22	20.9	10.7025
1994-12-23	20.9	10.6842
1994-12-24	20.9	10.6767
1994-12-25	20.9	10.6767
1994-12-26	20.9	10.6767
1994-12-27	20.9	10.6713
1994-12-28	20.9	10.6793
1994-12-29	20.9	13.7109
1994-12-30	26.6	14.3937
1994-12-31	28.5	15.1694
1995-01-01	28.5	15.5649
1995-01-02	28.5	15.7251
1995-01-03	28.5	15.7867
1995-01-04	28.5	15.6103
1995-01-05	28.5	15.2304
1995-01-06	28.5	15.2277
1995-01-07	26.6	15.4533
1995-01-08	32.3	18.2375
1995-01-09	32.3	19.8671
1995-01-10	34.2	26.9167
1995-01-11	53.2	31.2078
1995-01-12	53.2	31.2078
1995-01-13	53.2	33.1649
1995-01-14	55.1	33.4078
1995-01-15	55.1	34.7916
1995-01-16	57	36.1141
1995-01-17	58.9	40.8547
1995-01-18	72.2	47.0079
1995-01-19	74.1	48.0016
1995-01-20	76	48.9045
1995-01-21	76	48.9627
1995-01-22	76	48.9626
1995-01-23	74.1	48.9626
1995-01-24	74.1	49.123
1995-01-25	76	49.9726
1995-01-26	76	49.9726
1995-01-27	76	49.9725
1995-01-28	76	50.9104
1995-01-29	77.9	51.9925
1995-01-30	77.9	51.7894
1995-01-31	77.9	51.5028
1995-02-01	77.9	51.4926
1995-02-02	77.9	51.4909
1995-02-03	76	51.3528
1995-02-04	76	51.3235
1995-02-05	76	51.3235
1995-02-06	76	51.4545
1995-02-07	76	52.2153
1995-02-08	76	52.2067
1995-02-09	76	54.787
1995-02-10	87.4	58.8287
1995-02-11	87.4	58.792
1995-02-12	87.4	58.7873
1995-02-13	85.5	58.7869
1995-02-14	85.5	59.3665
1995-02-15	87.4	60.783
1995-02-16	87.4	61.7297
1995-02-17	87.4	61.7826
1995-02-18	87.4	61.7651
1995-02-19	85.5	61.7413
1995-02-20	85.5	61.7251
1995-02-21	85.5	61.6725
1995-02-22	83.6	61.5335
1995-02-23	76	61.2126
1995-02-24	76	61.2115
1995-02-25	76	61.9095
1995-02-26	79.8	63.6007
1995-02-27	79.8	63.7338
1995-02-28	79.8	63.7681
1995-03-01	76	63.7662
1995-03-02	76	63.799
1995-03-03	76	63.5593
1995-03-04	76	63.5064
1995-03-05	74.1	64.5516
1995-03-06	76	65.6599
1995-03-07	76	65.8136
1995-03-08	74.1	65.8125
1995-03-09	74.1	65.6778
1995-03-10	74.1	64.9674
1995-03-11	72.2	64.9558
1995-03-12	64.6	65.0076
1995-03-13	53.2	61.1811
1995-03-14	49.4	49.8118
1995-03-15	45.6	49.7454
1995-03-16	41.8	57.1989
1995-03-17	34.2	59.1343
1995-03-18	19	53.9763
1995-03-19	15.2	48.2765
1995-03-20	11.4	48.4191
1995-03-21	9.5	41.8121
1995-03-22	5.7	32.8092
1995-03-23	1.9	15.5041
1995-03-24	0	17.2874
1995-03-25	0	3.1924
1995-03-26	0	4.5336
1995-03-27	0	5.1528
1995-03-28	0	0
1995-03-29	0	0
1995-03-30	0	1.0575
1995-03-31	7.6	4.4527
1995-04-01	0	4.9585
1995-04-02	0	5.0962
1995-04-03	5.7	5.534
1995-04-04	0	3.8812
1995-04-05	1.9	11.6289
1995-04-06	13.3	12.1194
1995-04-07	5.7	12.1144
1995-04-08	0	12.106
1995-04-09	0	12.106
1995-04-10	0	12.106
1995-04-11	0	12.106
1995-04-12	0	7.167
1995-04-13	0	0
1995-04-14	0	0
1995-04-15	0	0
1995-04-16	0	0.4435
1995-04-17	0	0.495
1995-04-18	0	0
1995-04-19	0	0
1995-04-20	0	0
1995-04-21	0	0
1995-04-22	0	0
1995-04-23	0	0
1995-04-24	0	0
1995-04-25	0	0
1995-04-26	0	1.0496
1995-04-27	0	1.1996
1995-04-28	0	0.2684
1995-04-29	0	0.4026
1995-04-30	0	0
1995-05-01	0	0
1995-05-02	0	0.3432
1995-05-03	0	0.3922
1995-05-04	0	0
1995-05-05	0	0
1995-05-06	0	0.4396
1995-05-07	0	0.5867
1995-05-08	0	0
1995-05-09	0	6.5814e-09
1995-05-10	0	0
1995-05-11	0	3.8529e-05
1995-05-12	0	0.917
1995-05-13	0	1.3055
1995-05-14	0	0
1995-05-15	0	1.2799e-05
1995-05-16	0	0
1995-05-17	0	0
1995-05-18	0	0
1995-05-19	0	0
1995-05-20	0	0
1995-05-21	0	1.5468e-06
1995-05-22	0	8.4355e-05
1995-05-23	0	0
1995-05-24	0	0
1995-05-25	0	0
1995-05-26	0	0
1995-05-27	0	0
1995-05-28	0	0
1995-05-29	0	0
1995-05-30	0	0
1995-05-31	0	0
1995-06-01	0	0
1995-06-02	0	0
1995-06-03	0	0
1995-06-04	0	0
1995-06-05	0	0
1995-06-06	0	0
1995-06-07	0	0
1995-06-08	0	0
1995-06-09	0	0
1995-06-10	0	0
1995-06-11	0	0
1995-06-12	0	0
1995-06-13	0	0
1995-06-14	0	0
1995-06-15	0	0
1995-06-16	0	0
1995-06-17	0	0
1995-06-18	0	0
1995-06-19	0	0
1995-06-20	0	0
1995-06-21	0	0
1995-06-22	0	0
1995-06-23	0	0
1995-06-24	0	0
1995-06-25	0	0
1995-06-26	0	0
1995-06-27	0	0
1995-06-28	0	0
1995-06-29	0	0
1995-06-30	0	0
1995-07-01	0	0
1995-07-02	0	0
1995-07-03	0	0
1995-07-04	0	0
1995-07-05	0	0
1995-07-06	0	0
1995-07-07	0	0
1995-07-08	0	0
1995-07-09	0	0
1995-07-10	0	0
1995-07-11	0	0
1995-07-12	0	0
1995-07-13	0	0
1995-07-14	0	0
1995-07-15	0	0
1995-07-16	0	0
1995-07-17	0	0
1995-07-18	0	0
1995-07-19	0	0
1995-07-20	0	0
1995-07-21	0	0
1995-07-22	0	0
1995-07-23	0	0
1995-07-24	0	0
1995-07-25	0	0
1995-07-26	0	0
1995-07-27	0	0
1995-07-28	0	0
1995-07-29	0	0
1995-07-30	0	0
1995-07-31	0	0
1995-08-01	0	0
1995-08-02	0	0
1995-08-03	0	0
1995-08-04	0	0
1995-08-05	0	0
1995-08-06	0	0
1995-08-07	0	0
1995-08-08	0	0
1995-08-09	0	0
1995-08-10	0	0
1995-08-11	0	0
1995-08-12	0	0
1995-08-13	0	0
1995-08-14	0	0
1995-08-15	0	0
1995-08-16	0	0
1995-08-17	0	0
1995-08-18	0	0
1995-08-19	0	0
1995-08-20	0	0
1995-08-21	0	0
1995-08-22	0	0
1995-08-23	0	0
1995-08-24	0	0
1995-08-25	0	0
1995-08-26	0	0
1995-08-27	0	0
1995-08-28	0	0
1995-08-29	0	0
1995-08-30	0	0
1995-08-31	0	0
1995-09-01	0	0
1995-09-02	0	0
1995-09-03	0	0
1995-09-04	0	0
1995-09-05	0	0
1995-09-06	0	0
1995-09-07	0	0
1995-09-08	0	0
1995-09-09	0	0
1995-09-10	0	0
1995-09-11	0	0
1995-09-12	0	0
1995-09-13	0	0
1995-09-14	0	0
1995-09-15	0	0
1995-09-16	0	0
1995-09-17	0	0
1995-09-18	0	1.0187e-05
1995-09-19	0	0.00048101
1995-09-20	0	2.1264
1995-09-21	1.9	2.6316
1995-09-22	1.9	0
1995-09-23	0	0
1995-09-24	0	0
1995-09-25	0	0
1995-09-26	0	0
1995-09-27	0	0
1995-09-28	0	0
1995-09-29	0	0
1995-09-30	0	0
1995-10-01	0	0
1995-10-02	0	0
1995-10-03	0	0
1995-10-04	0	0
1995-10-05	0	0
1995-10-06	0	0
1995-10-07	0	0
1995-10-08	0	0
1995-10-09	0	0
1995-10-10	0	0
1995-10-11	0	0
1995-10-12	0	0
1995-10-13	0	0.00020318
1995-10-14	0	0
1995-10-15	0	0
1995-10-16	0	0
1995-10-17	0	0
1995-10-18	0	0.00046089
1995-10-19	0	0.0054178
1995-10-20	0	0
1995-10-21	0	0
1995-10-22	0	0
1995-10-23	0	0
1995-10-24	0	0
1995-10-25	0	0
1995-10-26	0	0
1995-10-27	0	0
1995-10-28	0	0.2212
1995-10-29	0	0.2839
1995-10-30	0	0
1995-10-31	0	0
1995-11-01	0	4.7783
1995-11-02	43.7	8.6365
1995-11-03	43.7	8.9114
1995-11-04	43.7	9.1685
1995-11-05	43.7	9.1425
1995-11-06	41.8	8.5792
1995-11-07	41.8	8.0613
1995-11-08	43.7	11.6622
1995-11-09	49.4	16.7709
1995-11-10	62.7	21.1462
1995-11-11	62.7	21.0178
1995-11-12	62.7	21.0178
1995-11-13	62.7	21.0178
1995-11-14	60.8	21.0178
1995-11-15	58.9	21.017
1995-11-16	58.9	21.017
1995-11-17	55.1	21.017
1995-11-18	55.1	20.9883
1995-11-19	47.5	20.948
1995-11-20	39.9	23.7312
1995-11-21	45.6	22.6748
1995-11-22	45.6	21.7693
1995-11-23	43.7	22.5104
1995-11-24	49.4	28.6035
1995-11-25	57	30.07
1995-11-26	57	30.07
1995-11-27	57	30.07
1995-11-28	53.2	30.2521
1995-11-29	53.2	34.7563
1995-11-30	68.4	41.772
1995-12-01	66.5	43.3252
1995-12-02	77.9	47.37
1995-12-03	77.9	47.4492
1995-12-04	77.9	47.2881
1995-12-05	77.9	43.2368
1995-12-06	76	42.5461
1995-12-07	76	46.1029
1995-12-08	87.4	49.4427
1995-12-09	89.3	49.0643
1995-12-10	89.3	49.0436
1995-12-11	89.3	49.0435
1995-12-12	87.4	49.1125
1995-12-13	91.2	53.8935
1995-12-14	93.1	54.105
1995-12-15	93.1	54.0374
1995-12-16	93.1	54.0374
1995-12-17	91.2	54.0374
1995-12-18	91.2	54.0374
1995-12-19	91.2	54.0374
1995-12-20	89.3	54.0374
1995-12-21	89.3	54.0374
1995-12-22	89.3	54.0374
1995-12-23		54.0333
1995-12-24		54.0184
1995-12-25		54.2176
1995-12-26		54.436
1995-12-27		54.4345
1995-12-28		54.4345
1995-12-29		54.4345
1995-12-30		54.4345
1995-12-31		56.2362
1996-01-01	85.5	56.8439
1996-01-02	85.5	56.8427
1996-01-03	85.5	58.0616
1996-01-04	87.4	58.6505
1996-01-05	87.4	58.6398
1996-01-06	87.4	58.6398
1996-01-07	87.4	58.6334
1996-01-08	87.4	60.0621
1996-01-09	91.2	62.6128
1996-01-10	91.2	62.5814
1996-01-11	91.2	62.5498
1996-01-12	89.3	62.4954
1996-01-13	89.3	62.4471
1996-01-14	89.3	62.3843
1996-01-15	89.3	63.4413
1996-01-16	100.7	70.9377
1996-01-17	100.7	71.0125
1996-01-18	102.6	71.7702
1996-01-19	102.6	71.7544
1996-01-20	102.6	71.7543
1996-01-21	102.6	71.7543
1996-01-22	100.7	71.7537
1996-01-23	100.7	71.7528
1996-01-24	100.7	71.7526
1996-01-25	98.8	71.7525
1996-01-26	98.8	71.7524
1996-01-27	98.8	71.7524
1996-01-28	96.9	71.7523
1996-01-29	96.9	71.7815
1996-01-30	96.9	71.9097
1996-01-31	96.9	71.9024
1996-02-01	96.9	71.9011
1996-02-02	96.9	71.9009
1996-02-03	96.9	71.9009
1996-02-04	96.9	71.9009
1996-02-05	96.9	71.8249
1996-02-06	95	71.0235
1996-02-07	91.2	70.9621
1996-02-08	89.3	70.9608
1996-02-09	85.5	77.6686
1996-02-10	104.5	81.3652
1996-02-11	104.5	81.0208
1996-02-12	104.5	81.0205
1996-02-13	104.5	80.9791
1996-02-14	102.6	81.309
1996-02-15	102.6	81.0957
1996-02-16	102.6	83.0544
1996-02-17	108.3	84.5009
1996-02-18	108.3	84.5005
1996-02-19	108.3	84.4355
1996-02-20	106.4	84.3643
1996-02-21	106.4	84.3514
1996-02-22	106.4	95.5897
1996-02-23	129.2	99.9147
1996-02-24	129.2	100.631
1996-02-25	129.2	100.625
1996-02-26	127.3	100.614
1996-02-27	127.3	100.197
1996-02-28	127.3	99.5226
1996-02-29	125.4	99.3245
1996-03-01	125.4	99.1579
1996-03-02	125.4	98.9778
1996-03-03	125.4	98.9693
1996-03-04	123.5	98.9693
1996-03-05	123.5	98.9693
1996-03-06	123.5	98.9693
1996-03-07	123.5	98.9634
1996-03-08	121.6	98.9413
1996-03-09	121.6	98.9335
1996-03-10	121.6	98.9335
1996-03-11	119.7	98.9335
1996-03-12	117.8	98.9335
1996-03-13	110.2	88.5198
1996-03-14	106.4	81.0636
1996-03-15	102.6	86.3146
1996-03-16	98.8	86.7274
1996-03-17	98.8	86.9197
1996-03-18	98.8	87.9919
1996-03-19	98.8	89.6518
1996-03-20	98.8	89.5437
1996-03-21	98.8	89.5437
1996-03-22	96.9	89.5437
1996-03-23	96.9	90.0676
1996-03-24	96.9	90.0412
1996-03-25	96.9	88.9394
1996-03-26	96.9	88.4661
1996-03-27	95	87.8743
1996-03-28	95	87.8665
1996-03-29	95	92.5541
1996-03-30	140.6	111.396
1996-03-31	136.8	111.342
1996-04-01	133	111.342
1996-04-02	131.1	111.562
1996-04-03	131.1	112.341
1996-04-04	129.2	112.338
1996-04-05	125.4	112.338
1996-04-06	121.6	112.338
1996-04-07	117.8	112.88
1996-04-08	114	113.338
1996-04-09	108.3	113.338
1996-04-10	98.8	101.428
1996-04-11	91.2	89.0425
1996-04-12	85.5	84.9877
1996-04-13	81.7	85.6275
1996-04-14	77.9	84.9608
1996-04-15	72.2	89.6614
1996-04-16	64.6	81.8938
1996-04-17	53.2	75.7062
1996-04-18	41.8	60.397
1996-04-19	34.2	48.2404
1996-04-20	38	53.2465
1996-04-21	34.2	51.3543
1996-04-22	30.4	48.0678
1996-04-23	24.7	31.5116
1996-04-24	19	15.4823
1996-04-25	11.4	18.8785
1996-04-26	32.3	20.1941
1996-04-27	28.5	20.1941
1996-04-28	19	18.8872
1996-04-29	7.6	10.3025
1996-04-30	0	0
1996-05-01	0	0
1996-05-02	0	0
1996-05-03	0	0
1996-05-04	0	0
1996-05-05	0	0
1996-05-06	0	0
1996-05-07	0	0
1996-05-08	0	0
1996-05-09	0	0
1996-05-10	0	0
1996-05-11	0	0
1996-05-12	0	0.3125
1996-05-13	0	0.3947
1996-05-14	0	0
1996-05-15	0	0
1996-05-16	0	0
1996-05-17	0	0
1996-05-18	0	7.1873e-06
1996-05-19	0	4.2518e-05
1996-05-20	0	0
1996-05-21	0	0
1996-05-22	0	0
1996-05-23	0	0
1996-05-24	0	0
1996-05-25	0	0
1996-05-26	0	0
1996-05-27	0	0
1996-05-28	0	0
1996-05-29	0	0
1996-05-30	0	7.4009e-08
1996-05-31	0	0
1996-06-01	0	0
1996-06-02	0	0
1996-06-03	0	0
1996-06-04	0	0
1996-06-05	0	0
1996-06-06	0	0
1996-06-07	0	0
1996-06-08	0	0
1996-06-09	0	0
1996-06-10	0	0
1996-06-11	0	0
1996-06-12	0	0
1996-06-13	0	0
1996-06-14	0	0
1996-06-15	0	0
1996-06-16	0	0
1996-06-17	0	0
1996-06-18	0	0
1996-06-19	0	0
1996-06-20	0	0
1996-06-21	0	0
1996-06-22	0	0
1996-06-23	0	0
1996-06-24	0	0
1996-06-25	0	0
1996-06-26	0	0
1996-06-27	0	0
1996-06-28	0	0
1996-06-29	0	0
1996-06-30	0	0
1996-07-01	0	0
1996-07-02	0	0
1996-07-03	0	0
1996-07-04	0	0
1996-07-05	0	0
1996-07-06	0	0
1996-07-07	0	0
1996-07-08	0	0
1996-07-09	0	0
1996-07-10	0	0
1996-07-11	0	0
1996-07-12	0	0
1996-07-13	0	0
1996-07-14	0	0
1996-07-15	0	0
1996-07-16	0	0
1996-07-17	0	0
1996-07-18	0	0
1996-07-19	0	0
1996-07-20	0	0
1996-07-21	0	0
1996-07-22	0	0
1996-07-23	0	0
1996-07-24	0	0
1996-07-25	0	0
1996-07-26	0	0
1996-07-27	0	0
1996-07-28	0	0
1996-07-29	0	0
1996-07-30	0	0
1996-07-31	0	0
1996-08-01	0	0
1996-08-02	0	0
1996-08-03	0	0
1996-08-04	0	0
1996-08-05	0	0
1996-08-06	0	0
1996-08-07	0	0
1996-08-08	0	0
1996-08-09	0	0
1996-08-10	0	0
1996-08-11	0	0
1996-08-12	0	0
1996-08-13	0	0
1996-08-14	0	0
1996-08-15	0	0
1996-08-16	0	0
1996-08-17	0	0
1996-08-18	0	0
1996-08-19	0	0
1996-08-20	0	0
1996-08-21	0	0
1996-08-22	0	0
1996-08-23	0	0
1996-08-24	0	0
1996-08-25	0	0
1996-08-26	0	0
1996-08-27	0	0
1996-08-28	0	0
1996-08-29	0	0
1996-08-30	0	0
1996-08-31	0	0
1996-09-01	0	0
1996-09-02	0	0
1996-09-03	0	0
1996-09-04	0	0
1996-09-05	0	0
1996-09-06	0	0
1996-09-07	0	0
1996-09-08	0	0
1996-09-09	0	0
1996-09-10	0	2.9157e-08
1996-09-11	0	8.444e-08
1996-09-12	0	0
1996-09-13	0	0
1996-09-14	0	0
1996-09-15	0	0
1996-09-16	0	0
1996-09-17	0	0
1996-09-18	0	0
1996-09-19	0	0
1996-09-20	0	0
1996-09-21	0	0
1996-09-22	0	0
1996-09-23	0	2.4098e-05
1996-09-24	0	1.4305e-07
1996-09-25	0	0
1996-09-26	0	0.00013823
1996-09-27	0	0
1996-09-28	0	0
1996-09-29	0	0
1996-09-30	0	0.0019239
1996-10-01	0	0.0484
1996-10-02	0	0
1996-10-03	0	0
1996-10-04	0	0
1996-10-05	0	0
1996-10-06	0	0
1996-10-07	0	0
1996-10-08	0	0
1996-10-09	0	0
1996-10-10	0	0
1996-10-11	0	0
1996-10-12	0	0
1996-10-13	0	0
1996-10-14	0	4.6442e-08
1996-10-15	0	0
1996-10-16	0	0
1996-10-17	0	0
1996-10-18	0	0
1996-10-19	0	0
1996-10-20	0	1.5064e-05
1996-10-21	0	3.3335e-05
1996-10-22	0	8.8583e-05
1996-10-23	0	0
1996-10-24	0	0
1996-10-25	0	0
1996-10-26	0	0
1996-10-27	0	0
1996-10-28	0	0
1996-10-29	0	0
1996-10-30	0	0.0076602
1996-10-31	3.8	1.8355
1996-11-01	3.8	1.5079
1996-11-02	3.8	1.4845
1996-11-03	0	1.4757
1996-11-04	0	0
1996-11-05	0	0.8702
1996-11-06	17.1	6.8747
1996-11-07	36.1	12.4113
1996-11-08	36.1	12.4005
1996-11-09	36.1	12.3824
1996-11-10	36.1	12.365
1996-11-11	34.2	12.365
1996-11-12	34.2	12.365
1996-11-13	34.2	12.365
1996-11-14	32.3	14.2133
1996-11-15	41.8	17.6848
1996-11-16	41.8	19.9127
1996-11-17	49.4	29.1574
1996-11-18	53.2	28.4674
1996-11-19	53.2	28.4477
1996-11-20	53.2	28.4476
1996-11-21	53.2	29.4632
1996-11-22	58.9	33.2879
1996-11-23	58.9	33.287
1996-11-24	57	33.287
1996-11-25	57	33.2849
1996-11-26	57	33.2782
1996-11-27	57	33.2782
1996-11-28	55.1	33.2782
1996-11-29	55.1	33.2781
1996-11-30	55.1	35.4994
1996-12-01	57	36.4322
1996-12-02	57	36.6488
1996-12-03	57	36.6488
1996-12-04	55.1	36.6488
1996-12-05	55.1	38.3357
1996-12-06	64.6	41.4587
1996-12-07	64.6	42.0081
1996-12-08	64.6	42.8817
1996-12-09	64.6	42.9409
1996-12-10	62.7	42.9282
1996-12-11	62.7	46.7776
1996-12-12	76	51.5395
1996-12-13	76	51.5395
1996-12-14	76	51.5395
1996-12-15	72.2	52.662
1996-12-16	79.8	56.7019
1996-12-17	83.6	55.9519
1996-12-18	85.5	54.6668
1996-12-19	85.5	56.1034
1996-12-20	85.5	63.2846
1996-12-21	95	64.121
1996-12-22	95	64.0563
1996-12-23		64.0563
1996-12-24		64.0563
1996-12-25		64.0563
1996-12-26		64.0563
1996-12-27		65.6288
1996-12-28		68.8182
1996-12-29		68.8047
1996-12-30		68.8047
1996-12-31		71.6248
1997-01-01	102.6	74.5871
1997-01-02	106.4	76.0816
1997-01-03	106.4	76.0794
1997-01-04	106.4	76.0791
1997-01-05	102.6	76.0369
1997-01-06	102.6	76.0291
1997-01-07	102.6	76.0291
1997-01-08	98.8	77.1241
1997-01-09	104.5	79.5838
1997-01-10	104.5	78.6287
1997-01-11	102.6	78.2795
1997-01-12	102.6	78.6724
1997-01-13	100.7	78.4234
1997-01-14	100.7	78.1769
1997-01-15	100.7	74.7138
1997-01-16	98.8	71.6452
1997-01-17		71.5748
1997-01-18		72.6426
1997-01-19		73.3509
1997-01-20		73.3509
1997-01-21		76.3927
1997-01-22		71.7681
1997-01-23		71.8277
1997-01-24		72.0083
1997-01-25		71.7831
1997-01-26		72.2084
1997-01-27		72.3708
1997-01-28		72.3186
1997-01-29		72.2869
1997-01-30		73.2581
1997-01-31		77.7673
1997-02-01	117.8	77.7491
1997-02-02	117.8	77.7452
1997-02-03	117.8	77.7452
1997-02-04	115.9	77.7452
1997-02-05	114	77.7375
1997-02-06	114	77.7143
1997-02-07	110.2	77.7097
1997-02-08	110.2	77.6915
1997-02-09	110.2	77.6564
1997-02-10	106.4	77.2845
1997-02-11	106.4	77.2247
1997-02-12	106.4	77.1471
1997-02-13	106.4	76.5959
1997-02-14	112.1	81.0521
1997-02-15	114	81.1134
1997-02-16	114	82.8293
1997-02-17	115.9	83.8948
1997-02-18	115.9	84.5104
1997-02-19	114	84.5386
1997-02-20	112.1	83.7288
1997-02-21	112.1	85.0119
1997-02-22	114	85.1147
1997-02-23	114	85.0969
1997-02-24	114	85.0466
1997-02-25	112.1	85.3366
1997-02-26	110.2	85.0958
1997-02-27	110.2	85.0831
1997-02-28	110.2	89.8919
1997-03-01	119.7	91.411
1997-03-02	119.7	91.8694
1997-03-03	119.7	91.7002
1997-03-04	119.7	91.0171
1997-03-05	119.7	91.6002
1997-03-06	117.8	91.78
1997-03-07	117.8	91.7797
1997-03-08	117.8	91.7733
1997-03-09	115.9	91.768
1997-03-10	115.9	91.768
1997-03-11	115.9	91.768
1997-03-12	114	91.768
1997-03-13	114	91.768
1997-03-14	114	91.768
1997-03-15	112.1	91.768
1997-03-16	112.1	91.7652
1997-03-17	112.1	91.7629
1997-03-18	108.3	91.7629
1997-03-19	108.3	91.7598
1997-03-20	106.4	91.8352
1997-03-21	106.4	91.9308
1997-03-22	106.4	88.6037
1997-03-23	104.5	91.9315
1997-03-24	106.4	99.6067
1997-03-25	106.4	99.8311
1997-03-26	100.7	99.793
1997-03-27	95	94.503
1997-03-28	83.6	100.932
1997-03-29	81.7	98.4806
1997-03-30	79.8	101.801
1997-03-31	77.9	101.801
1997-04-01	74.1	101.801
1997-04-02	66.5	93.1681
1997-04-03	62.7	90.6196
1997-04-04	58.9	81.3302
1997-04-05	68.4	92.2147
1997-04-06	121.6	107.174
1997-04-07	123.5	101.489
1997-04-08	119.7	101.252
1997-04-09	115.9	101.25
1997-04-10	112.1	101.25
1997-04-11	108.3	101.25
1997-04-12	96.9	101.25
1997-04-13	91.2	101.25
1997-04-14	83.6	99.7678
1997-04-15	76	103.745
1997-04-16	72.2	103.527
1997-04-17	68.4	103.357
1997-04-18	62.7	101.649
1997-04-19	45.6	80.6124
1997-04-20	34.2	61.0456
1997-04-21	22.8	43.1994
1997-04-22	15.2	30.9095
1997-04-23	5.7	11.1441
1997-04-24	0	0.00024816
1997-04-25	0	0.0024149
1997-04-26	0	0.0063214
1997-04-27	0	0
1997-04-28	0	0
1997-04-29	0	0
1997-04-30	0	0
1997-05-01	0	0
1997-05-02	0	0
1997-05-03	0	1.836
1997-05-04	0	1.9862
1997-05-05	0	0
1997-05-06	0	0.00047895
1997-05-07	0	0
1997-05-08	0	0
1997-05-09	0	0
1997-05-10	0	0
1997-05-11	0	0
1997-05-12	0	2.8868
1997-05-13	0	3.0139
1997-05-14	0	0.1256
1997-05-15	0	0.7513
1997-05-16	0	0
1997-05-17	0	0
1997-05-18	0	0.00063665
1997-05-19	0	0
1997-05-20	0	0
1997-05-21	0	3.5589e-08
1997-05-22	0	0
1997-05-23	0	0
1997-05-24	0	0
1997-05-25	0	0
1997-05-26	0	0
1997-05-27	0	0
1997-05-28	0	0
1997-05-29	0	0
1997-05-30	0	0
1997-05-31	0	0
1997-06-01	0	0
1997-06-02	0	0
1997-06-03	0	0
1997-06-04	0	0
1997-06-05	0	0
1997-06-06	0	0
1997-06-07	0	0
1997-06-08	0	0
1997-06-09	0	0
1997-06-10	0	0
1997-06-11	0	0
1997-06-12	0	0
1997-06-13	0	0
1997-06-14	0	0
1997-06-15	0	0
1997-06-16	0	0
1997-06-17	0	0
1997-06-18	0	4.2698e-05
1997-06-19	0	0
1997-06-20	0	0
[truncated: 6,038 more rows]
