# Supplementary material for: Simulating cold-region hydrology in an intensively drained agricultural watershed in Manitoba, Canada, using the Cold Regions Hydrological Model
Source: Copernicus journal article supplement (doi:10.5194/hess-2016-462), 2016-09-27
Supplement: Supplementary file 13 [file Cordeiro2016_PlotDataFig08.xlsx]

## Sheet: Sheet1
Year	AAFC calcualtion for Portage La Prairie	CRHM
1992	758	701
1993	603	684
1994	663	834
1995	749	742
1996	656	771
