# Supplementary material for: Simulating cold-region hydrology in an intensively drained agricultural watershed in Manitoba, Canada, using the Cold Regions Hydrological Model
Source: Copernicus journal article supplement (doi:10.5194/hess-2016-462), 2016-09-27
Supplement: Supplementary file 15 [file Cordeiro2016_PlotDataFig09.xlsx]

## Sheet: Sheet1
	Soil moisture (mm)
Date	AAFC AgriClimate	CRHM
1992-01-01	135.11	171.088
1992-01-02	135.11	171.088
1992-01-03	135.11	171.088
1992-01-04	135.11	171.088
1992-01-05	135.11	171.088
1992-01-06	135.11	171.088
1992-01-07	135.11	171.088
1992-01-08	135.11	171.088
1992-01-09	135.11	171.088
1992-01-10	135.11	171.088
1992-01-11	135.11	171.088
1992-01-12	135.11	171.088
1992-01-13	135.11	171.088
1992-01-14	135.11	171.088
1992-01-15	135.11	171.088
1992-01-16	135.11	171.088
1992-01-17	135.11	171.088
1992-01-18	135.11	171.088
1992-01-19	135.11	171.088
1992-01-20	135.11	171.088
1992-01-21	135.11	171.088
1992-01-22	135.11	171.088
1992-01-23	135.11	171.088
1992-01-24	135.11	171.088
1992-01-25	135.11	171.088
1992-01-26	135.11	171.088
1992-01-27	135.11	171.088
1992-01-28	135.11	171.088
1992-01-29	135.11	171.088
1992-01-30	135.13	171.088
1992-01-31	135.13	171.088
1992-02-01	135.13	171.088
1992-02-02	135.13	171.088
1992-02-03	135.14	171.088
1992-02-04	135.14	171.088
1992-02-05	135.14	171.088
1992-02-06	135.14	171.088
1992-02-07	135.14	171.088
1992-02-08	135.14	171.088
1992-02-09	135.14	171.088
1992-02-10	135.14	171.088
1992-02-11	135.14	171.088
1992-02-12	135.14	171.088
1992-02-13	135.14	171.088
1992-02-14	135.14	171.088
1992-02-15	135.14	171.088
1992-02-16	135.14	171.088
1992-02-17	135.14	171.088
1992-02-18	135.14	171.088
1992-02-19	135.14	171.088
1992-02-20	135.14	171.088
1992-02-21	135.14	171.088
1992-02-22	135.14	171.088
1992-02-23	135.14	171.088
1992-02-24	135.14	171.088
1992-02-25	135.14	171.088
1992-02-26	135.14	171.088
1992-02-27	135.14	171.088
1992-02-28	135.14	171.088
1992-02-29	135.14	171.088
1992-03-01	135.14	171.088
1992-03-02	135.43	171.088
1992-03-03	135.43	171.088
1992-03-04	135.63	171.088
1992-03-05	136.13	171.088
1992-03-06	143.73	171.088
1992-03-07	147.93	171.088
1992-03-08	147.93	171.088
1992-03-09	147.93	171.088
1992-03-10	147.93	171.088
1992-03-11	147.93	171.088
1992-03-12	147.93	171.088
1992-03-13	147.93	171.088
1992-03-14	147.93	171.088
1992-03-15	147.93	171.088
1992-03-16	147.93	171.088
1992-03-17	147.93	171.088
1992-03-18	147.93	171.088
1992-03-19	147.93	171.088
1992-03-20	147.93	171.088
1992-03-21	147.93	171.088
1992-03-22	147.93	171.088
1992-03-23	147.93	171.088
1992-03-24	147.93	171.088
1992-03-25	148.39	171.088
1992-03-26	148.39	171.088
1992-03-27	148.39	171.088
1992-03-28	150.24	171.088
1992-03-29	153.44	171.088
1992-03-30	153.81	171.088
1992-03-31	154.87	171.088
1992-04-01	154.87	171.088
1992-04-02	155.21	171.088
1992-04-03	155.47	171.088
1992-04-04	156.42	171.088
1992-04-05	161.44	171.088
1992-04-06	160.65	171.088
1992-04-07	159.86	171.088
1992-04-08	160.21	171.088
1992-04-09	159.63	171.088
1992-04-10	159	171.088
1992-04-11	158.41	171.088
1992-04-12	157.83	171.088
1992-04-13	157.69	171.088
1992-04-14	158.04	171.088
1992-04-15	160.15	171.088
1992-04-16	159.49	171.034
1992-04-17	158.75	170.843
1992-04-18	166.8	171.832
1992-04-19	178.91	184.699
1992-04-20	178.11	185.508
1992-04-21	177.34	185.508
1992-04-22	176.5	185.508
1992-04-23	176.37	185.508
1992-04-24	175.42	185.508
1992-04-25	174.37	185.508
1992-04-26	173.3	185.217
1992-04-27	172.07	184.57
1992-04-28	170.73	184.526
1992-04-29	170.69	184.535
1992-04-30	169.5	183.338
1992-05-01	168.22	182.294
1992-05-02	167.65	181.513
1992-05-03	166.75	180.914
1992-05-04	165.63	179.62
1992-05-05	164.3	178.301
1992-05-06	162.75	177.264
1992-05-07	161.39	176.058
1992-05-08	160.61	176.919
1992-05-09	162	176.496
1992-05-10	170.86	179.367
1992-05-11	169.65	184.293
1992-05-12	168.7	183.523
1992-05-13	168.11	182.522
1992-05-14	167.31	183.782
1992-05-15	166.01	184.325
1992-05-16	165.19	183.925
1992-05-17	163.94	182.69
1992-05-18	162.41	181.382
1992-05-19	162.53	180.127
1992-05-20	160.84	178.846
1992-05-21	159.6	177.757
1992-05-22	158.98	177.139
1992-05-23	157.89	176.399
1992-05-24	156.86	175.129
1992-05-25	155.7	174.085
1992-05-26	153.97	172.973
1992-05-27	152.09	171.79
1992-05-28	150	170.707
1992-05-29	147.91	169.712
1992-05-30	145.95	170.008
1992-05-31	143.9	168.98
1992-06-01	141.86	167.736
1992-06-02	139.75	166.394
1992-06-03	138.92	165.607
1992-06-04	154.17	172.409
1992-06-05	155.18	174.602
1992-06-06	153.44	176.719
1992-06-07	151.59	176.683
1992-06-08	149.53	175.046
1992-06-09	147.2	173.797
1992-06-10	144.88	172.57
1992-06-11	142.56	171.286
1992-06-12	140.49	169.899
1992-06-13	138.43	168.408
1992-06-14	136.53	166.999
1992-06-15	134.57	165.748
1992-06-16	140.13	165.362
1992-06-17	137.28	169.021
1992-06-18	133.68	169.643
1992-06-19	130.36	168.439
1992-06-20	127.02	166.974
1992-06-21	133.02	168.292
1992-06-22	135.02	169.26
1992-06-23	131.27	169.655
1992-06-24	147.87	169.318
1992-06-25	144.28	170.349
1992-06-26	140.47	168.885
1992-06-27	136.98	168.044
1992-06-28	133.56	166.914
1992-06-29	130.07	165.436
1992-06-30	127.22	163.886
1992-07-01	129.5	163.932
1992-07-02	136.9	167.613
1992-07-03	142.05	168.65
1992-07-04	138.46	169.09
1992-07-05	134.8	167.253
1992-07-06	133.19	167.386
1992-07-07	130.34	166.425
1992-07-08	126.48	165.513
1992-07-09	128.78	164.952
1992-07-10	125.37	165.323
1992-07-11	121.83	163.611
1992-07-12	118.22	161.606
1992-07-13	114.52	159.53
1992-07-14	134.75	159.525
1992-07-15	132.72	162.927
1992-07-16	131.89	161.803
1992-07-17	128.25	160.333
1992-07-18	148.33	159.976
1992-07-19	144.49	159.263
1992-07-20	141.63	157.709
1992-07-21	137.53	155.775
1992-07-22	133.33	153.653
1992-07-23	129.11	151.473
1992-07-24	128.4	150.467
1992-07-25	124.19	151.638
1992-07-26	124.73	151.345
1992-07-27	122.73	151.615
1992-07-28	118.87	150.964
1992-07-29	115.02	149.097
1992-07-30	113.11	147.28
1992-07-31	112.49	147.758
1992-08-01	108.61	148.446
1992-08-02	104.84	147.159
1992-08-03	101.28	145.52
1992-08-04	97.71	143.854
1992-08-05	94.08	142.097
1992-08-06	90.39	140.468
1992-08-07	86.68	139.053
1992-08-08	87.54	140.24
1992-08-09	83.7	140.633
1992-08-10	80.85	141.269
1992-08-11	80.38	142.211
1992-08-12	77.36	141.064
1992-08-13	74.11	139.513
1992-08-14	70.77	137.759
1992-08-15	68.7	136.043
1992-08-16	71.21	138.971
1992-08-17	68.03	140.942
1992-08-18	64.91	139.31
1992-08-19	66.93	138.286
1992-08-20	65.03	139.482
1992-08-21	62.7	139.63
1992-08-22	67.36	140.079
1992-08-23	70.47	143.308
1992-08-24	67.84	146.086
1992-08-25	65.21	145.165
1992-08-26	62.65	143.755
1992-08-27	60.08	142.514
1992-08-28	57.35	141.305
1992-08-29	76.36	141.574
1992-08-30	73.87	146.379
1992-08-31	71.36	146.692
1992-09-01	69.56	146.417
1992-09-02	69.62	148.647
1992-09-03	67.72	148.78
1992-09-04	66.58	148.484
1992-09-05	64.27	148.346
1992-09-06	62.23	148.163
1992-09-07	60.18	147.871
1992-09-08	67.67	148.96
1992-09-09	80.45	152.175
1992-09-10	79.56	157.552
1992-09-11	78.64	157.574
1992-09-12	79.88	157.844
1992-09-13	78.96	159.62
1992-09-14	78.17	159.158
1992-09-15	81.19	160.046
1992-09-16	82.24	162.001
1992-09-17	88.92	165.682
1992-09-18	88.15	167.18
1992-09-19	87.36	166.72
1992-09-20	86.52	166.246
1992-09-21	85.79	165.778
1992-09-22	85.2	165.33
1992-09-23	84.51	164.778
1992-09-24	83.76	164.293
1992-09-25	83.52	164.068
1992-09-26	82.91	163.842
1992-09-27	92.73	168.845
1992-09-28	92.17	171.968
1992-09-29	91.51	171.77
1992-09-30	90.83	171.275
1992-10-01	90.11	170.638
1992-10-02	89.47	170.008
1992-10-03	88.85	169.456
1992-10-04	88.27	168.987
1992-10-05	87.93	169.171
1992-10-06	87.46	169.167
1992-10-07	87.02	168.695
1992-10-08	86.61	168.278
1992-10-09	86.2	167.79
1992-10-10	85.79	167.327
1992-10-11	85.37	167.059
1992-10-12	85.02	166.911
1992-10-13	86.55	166.741
1992-10-14	86.26	166.67
1992-10-15	86.89	166.569
1992-10-16	86.64	166.535
1992-10-17	86.41	166.506
1992-10-18	86.8	166.475
1992-10-19	87.76	166.457
1992-10-20	87.51	166.457
1992-10-21	87.18	166.369
1992-10-22	86.88	166.192
1992-10-23	86.59	166.027
1992-10-24	86.3	165.842
1992-10-25	86	165.607
1992-10-26	85.75	165.329
1992-10-27	86.41	165.065
1992-10-28	86.4	164.947
1992-10-29	86.18	164.822
1992-10-30	85.99	164.696
1992-10-31	85.8	164.639
1992-11-01	85.62	164.56
1992-11-02	85.46	164.538
1992-11-03	85.3	164.684
1992-11-04	85.15	164.684
1992-11-05	85.03	164.684
1992-11-06	84.92	164.684
1992-11-07	84.82	164.684
1992-11-08	84.69	164.684
1992-11-09	97.16	164.684
1992-11-10	96.98	164.684
1992-11-11	96.82	164.684
1992-11-12	96.67	164.684
1992-11-13	96.54	164.684
1992-11-14	96.44	164.684
1992-11-15	96.44	164.684
1992-11-16	96.44	164.684
1992-11-17	96.44	164.684
1992-11-18	96.44	164.684
1992-11-19	96.44	164.684
1992-11-20	96.44	164.684
1992-11-21	96.44	164.684
1992-11-22	96.44	164.684
1992-11-23	96.44	164.684
1992-11-24	96.44	164.684
1992-11-25	96.44	164.684
1992-11-26	96.44	164.684
1992-11-27	96.44	164.684
1992-11-28	96.44	164.684
1992-11-29	96.44	164.684
1992-11-30	96.44	164.684
1992-12-01	97.44	164.684
1992-12-02	97.44	164.684
1992-12-03	97.44	164.684
1992-12-04	97.44	164.684
1992-12-05	97.44	164.684
1992-12-06	97.44	164.684
1992-12-07	97.44	164.684
1992-12-08	97.44	164.684
1992-12-09	97.44	164.684
1992-12-10	97.44	164.684
1992-12-11	97.44	164.684
1992-12-12	97.44	164.684
1992-12-13	97.44	164.684
1992-12-14	97.44	164.684
1992-12-15	97.44	164.684
1992-12-16	97.44	164.684
1992-12-17	97.44	164.684
1992-12-18	97.44	164.684
1992-12-19	97.44	164.684
1992-12-20	97.44	164.684
1992-12-21	97.44	164.684
1992-12-22	97.44	164.684
1992-12-23	97.44	164.684
1992-12-24	97.44	164.684
1992-12-25	97.44	164.684
1992-12-26	97.44	164.684
1992-12-27	97.44	164.684
1992-12-28	97.44	164.684
1992-12-29	97.44	164.684
1992-12-30	97.44	164.684
1992-12-31	97.44	164.684
1993-01-01	97.44	164.684
1993-01-02	97.44	164.684
1993-01-03	97.44	164.684
1993-01-04	97.44	164.684
1993-01-05	97.44	164.684
1993-01-06	97.44	164.684
1993-01-07	97.44	164.684
1993-01-08	97.44	164.684
1993-01-09	97.44	164.684
1993-01-10	97.44	164.684
1993-01-11	97.44	164.684
1993-01-12	97.44	164.684
1993-01-13	97.44	164.684
1993-01-14	97.44	164.684
1993-01-15	97.44	164.684
1993-01-16	97.44	164.684
1993-01-17	97.44	164.684
1993-01-18	97.44	164.684
1993-01-19	97.44	164.684
1993-01-20	97.44	164.684
1993-01-21	97.44	164.684
1993-01-22	97.44	164.684
1993-01-23	97.44	164.684
1993-01-24	97.44	164.684
1993-01-25	97.44	164.684
1993-01-26	97.44	164.684
1993-01-27	97.44	164.684
1993-01-28	97.44	164.684
1993-01-29	97.44	164.684
1993-01-30	97.44	164.684
1993-01-31	97.44	164.684
1993-02-01	97.44	164.684
1993-02-02	97.44	164.684
1993-02-03	97.44	164.684
1993-02-04	97.44	164.684
1993-02-05	97.44	164.684
1993-02-06	97.44	164.684
1993-02-07	97.44	164.684
1993-02-08	97.44	164.684
1993-02-09	97.44	164.684
1993-02-10	97.44	164.684
1993-02-11	97.44	164.684
1993-02-12	97.44	164.684
1993-02-13	97.44	164.684
1993-02-14	97.44	164.684
1993-02-15	97.44	164.684
1993-02-16	97.44	164.684
1993-02-17	97.44	164.684
1993-02-18	97.44	164.684
1993-02-19	97.44	164.684
1993-02-20	97.44	164.684
1993-02-21	97.44	164.684
1993-02-22	97.44	164.684
1993-02-23	97.44	164.684
1993-02-24	97.44	164.684
1993-02-25	97.44	164.684
1993-02-26	97.44	164.684
1993-02-27	97.44	164.684
1993-02-28	97.44	164.684
1993-03-01	97.44	164.684
1993-03-02	97.44	164.684
1993-03-03	97.44	168.609
1993-03-04	97.44	172.875
1993-03-05	97.44	172.956
1993-03-06	97.44	173.049
1993-03-07	97.44	173.064
1993-03-08	97.44	173.078
1993-03-09	102.44	173.087
1993-03-10	103.01	173.091
1993-03-11	103.01	173.091
1993-03-12	103.01	173.091
1993-03-13	103.01	173.091
1993-03-14	103.01	173.091
1993-03-15	103.01	173.091
1993-03-16	103.01	173.091
1993-03-17	103.01	173.091
1993-03-18	103.01	173.091
1993-03-19	103.01	173.091
1993-03-20	103.01	173.091
1993-03-21	103.01	173.091
1993-03-22	103.01	173.091
1993-03-23	103.01	173.091
1993-03-24	109.94	173.091
1993-03-25	111.29	173.103
1993-03-26	111.82	173.127
1993-03-27	113.5	173.138
1993-03-28	114.84	173.138
1993-03-29	115.26	173.138
1993-03-30	115.5	173.138
1993-03-31	115.92	173.133
1993-04-01	115.94	173.12
1993-04-02	115.96	173.104
1993-04-03	117.95	172.962
1993-04-04	123.33	172.633
1993-04-05	122.54	172.281
1993-04-06	121.78	171.904
1993-04-07	120.98	171.509
1993-04-08	120.26	171.2
1993-04-09	119.56	171.015
1993-04-10	118.88	170.763
1993-04-11	118.14	170.351
1993-04-12	119.42	171.963
1993-04-13	119.63	174.167
1993-04-14	118.86	174.325
1993-04-15	118.1	173.443
1993-04-16	117.34	172.62
1993-04-17	116.53	172.115
1993-04-18	115.82	171.625
1993-04-19	115.14	171.083
1993-04-20	114.42	170.497
1993-04-21	113.58	169.822
1993-04-22	112.71	168.922
1993-04-23	111.88	167.993
1993-04-24	112.25	167.641
1993-04-25	111.65	167.502
1993-04-26	110.8	167.267
1993-04-27	135.71	167.267
1993-04-28	140.65	167.267
1993-04-29	145.57	178.864
1993-04-30	144.38	191.102
1993-05-01	143.22	190.349
1993-05-02	142.01	189.262
1993-05-03	140.62	187.833
1993-05-04	139.25	186.753
1993-05-05	137.81	185.437
1993-05-06	137.39	184.042
1993-05-07	149.03	186.292
1993-05-08	182.69	194.893
1993-05-09	197.53	203.562
1993-05-10	195.68	204.273
1993-05-11	193.72	202.779
1993-05-12	191.98	200.962
1993-05-13	190.18	199.264
1993-05-14	190.36	200.365
1993-05-15	189.8	201.267
1993-05-16	188.38	201.505
1993-05-17	188.2	201.219
1993-05-18	187.03	200.463
1993-05-19	185.57	199.524
1993-05-20	184.11	198.369
1993-05-21	182.56	197.065
1993-05-22	180.76	195.731
1993-05-23	179.31	194.871
1993-05-24	177.89	194.019
1993-05-25	177.62	193.923
1993-05-26	176.33	193.815
1993-05-27	175.2	192.92
1993-05-28	173.84	191.853
1993-05-29	174.32	190.031
1993-05-30	173.77	188.882
1993-05-31	173	187.303
1993-06-01	171.57	185.575
1993-06-02	170.63	183.823
1993-06-03	169.25	181.886
1993-06-04	167.81	179.644
1993-06-05	166.26	177.435
1993-06-06	164.28	175.708
1993-06-07	164.53	176.713
1993-06-08	175.85	177.387
1993-06-09	173.45	176.651
1993-06-10	173.23	176.022
1993-06-11	170.77	174.275
1993-06-12	185.05	174.448
1993-06-13	183.82	173.485
1993-06-14	182.06	172.578
1993-06-15	179.77	174.492
1993-06-16	186.02	176.9
1993-06-17	183.76	177.056
1993-06-18	181.41	174.545
1993-06-19	178.99	172.539
1993-06-20	176.42	172.552
1993-06-21	173.96	172.308
1993-06-22	180.7	171.948
1993-06-23	179.83	172.21
1993-06-24	179.52	172.719
1993-06-25	176.64	173.401
1993-06-26	173.34	173.618
1993-06-27	169.91	174.335
1993-06-28	166.57	173.426
1993-06-29	163.96	175.138
1993-06-30	169.33	177.312
1993-07-01	168.95	179.131
1993-07-02	166.05	178.116
1993-07-03	175.26	178.902
1993-07-04	174.88	177.411
1993-07-05	189.45	180.781
1993-07-06	189.11	183.365
1993-07-07	185.39	182.201
1993-07-08	181.49	179.764
1993-07-09	177.43	176.839
1993-07-10	173.59	174.571
1993-07-11	169.95	172.963
1993-07-12	166.82	171.364
1993-07-13	163.58	169.69
1993-07-14	159.88	168.056
1993-07-15	158.67	167.864
1993-07-16	158.42	170.419
1993-07-17	154.6	171.226
1993-07-18	165.31	172.924
1993-07-19	162.13	173.736
1993-07-20	158.86	171.767
1993-07-21	155.44	170.944
1993-07-22	160.42	171.254
1993-07-23	156.59	171.992
1993-07-24	158.85	172.783
1993-07-25	186.21	174.432
1993-07-26	182.15	173.665
1993-07-27	185.97	175.04
1993-07-28	181.65	174.741
1993-07-29	177.11	172.745
1993-07-30	172.6	171.226
1993-07-31	168.18	170.51
1993-08-01	166.51	169.565
1993-08-02	170.21	169.506
1993-08-03	166.35	169.273
1993-08-04	167.21	171.693
1993-08-05	163.54	171.232
1993-08-06	159.59	169.246
1993-08-07	155.53	167.123
1993-08-08	171.86	175.504
1993-08-09	167.65	176.905
1993-08-10	163.38	174.28
1993-08-11	180.71	176.146
1993-08-12	177.25	179.78
1993-08-13	173.61	176.796
1993-08-14	181.27	176.213
1993-08-15	177.76	179.5
1993-08-16	173.99	177.073
1993-08-17	171.44	175.833
1993-08-18	167.97	180.01
1993-08-19	165.52	179.7
1993-08-20	161.79	177.305
1993-08-21	157.98	174.721
1993-08-22	154.17	173.195
1993-08-23	150.62	173.358
1993-08-24	146.84	174.193
1993-08-25	145.56	173.007
1993-08-26	142.18	176.797
1993-08-27	143.07	178.617
1993-08-28	142.44	177.446
1993-08-29	140.99	180.112
1993-08-30	139.8	181.34
1993-08-31	136.89	181.895
1993-09-01	135.1	182.208
1993-09-02	133.4	182.596
1993-09-03	132.01	182.496
1993-09-04	129.44	184.494
1993-09-05	127.24	183.799
1993-09-06	124.66	184.499
1993-09-07	122.08	183.151
1993-09-08	122.89	183.232
1993-09-09	120.58	187.171
1993-09-10	118.15	186.121
1993-09-11	115.54	184.883
1993-09-12	114.45	187.42
1993-09-13	112.89	187.366
1993-09-14	110.84	186.724
1993-09-15	108.78	185.773
1993-09-16	109.25	186.12
1993-09-17	108.93	185.994
1993-09-18	108.41	185.316
1993-09-19	107.9	184.473
1993-09-20	107.39	183.582
1993-09-21	108.53	183.004
1993-09-22	110.04	184.494
1993-09-23	109.5	183.705
1993-09-24	108.96	182.864
1993-09-25	108.45	182.962
1993-09-26	109.04	183.465
1993-09-27	110.57	183.073
1993-09-28	110.16	182.522
1993-09-29	109.74	182.367
1993-09-30	109.68	182.373
1993-10-01	109.36	182.466
1993-10-02	109	182.571
1993-10-03	108.55	182.503
1993-10-04	108.18	182.656
1993-10-05	107.79	182.735
1993-10-06	107.44	182.451
1993-10-07	107.17	182.344
1993-10-08	106.92	182.318
1993-10-09	106.62	182.026
1993-10-10	106.29	181.381
1993-10-11	106.02	180.987
1993-10-12	105.8	180.811
1993-10-13	105.51	180.406
1993-10-14	105.26	179.83
1993-10-15	105.19	179.205
1993-10-16	105.94	180.86
1993-10-17	106.48	181.024
1993-10-18	106.19	181.017
1993-10-19	185.93	180.999
1993-10-20	185.44	183.596
1993-10-21	185.99	184.806
1993-10-22	185.49	184.818
1993-10-23	184.95	184.887
1993-10-24	184.45	184.756
1993-10-25	190.01	185.185
1993-10-26	190.65	185.306
1993-10-27	207.02	185.313
1993-10-28	208.67	185.322
1993-10-29	208.38	185.319
1993-10-30	208.14	185.313
1993-10-31	207.82	185.308
1993-11-01	208.87	185.27
1993-11-02	209.55	185.238
1993-11-03	210.26	185.232
1993-11-04	210.01	185.223
1993-11-05	209.81	185.215
1993-11-06	209.61	185.213
1993-11-07	209.41	185.21
1993-11-08	208.99	185.207
1993-11-09	208.34	185.207
1993-11-10	207.65	185.207
1993-11-11	206.94	185.207
1993-11-12	206.23	185.207
1993-11-13	205.54	185.207
1993-11-14	204.84	185.207
1993-11-15	204.16	185.207
1993-11-16	204.48	185.207
1993-11-17	203.83	185.207
1993-11-18	203.18	185.207
1993-11-19	202.59	185.203
1993-11-20	201.98	185.191
1993-11-21	201.41	185.168
1993-11-22	200.92	185.161
1993-11-23	200.43	185.155
1993-11-24	199.95	185.152
1993-11-25	199.46	185.15
1993-11-26	198.97	185.15
1993-11-27	198.49	185.15
1993-11-28	198.03	185.15
1993-11-29	197.61	185.15
1993-11-30	197.18	185.15
1993-12-01	196.74	185.15
1993-12-02	196.34	185.15
1993-12-03	195.95	185.15
1993-12-04	195.56	185.15
1993-12-05	195.18	185.15
1993-12-06	194.83	185.15
1993-12-07	194.48	185.15
1993-12-08	194.14	185.15
1993-12-09	193.83	185.15
1993-12-10	193.54	185.15
1993-12-11	193.23	185.15
1993-12-12	192.93	185.15
1993-12-13	192.62	185.15
1993-12-14	192.33	185.15
1993-12-15	192.04	185.15
1993-12-16	191.76	185.15
1993-12-17	191.48	185.15
1993-12-18	191.21	185.15
1993-12-19	190.95	185.15
1993-12-20	190.73	185.15
1993-12-21	190.49	185.15
1993-12-22	190.29	185.15
1993-12-23	190.09	185.15
1993-12-24	189.93	185.15
1993-12-25	189.77	185.15
1993-12-26	189.62	185.15
1993-12-27	189.47	185.15
1993-12-28	189.32	185.15
1993-12-29	189.18	185.15
1993-12-30	189.05	185.15
1993-12-31	188.91	185.15
1994-01-01	188.79	185.15
1994-01-02	188.66	185.15
1994-01-03	188.54	185.15
1994-01-04	188.42	185.15
1994-01-05	188.3	185.15
1994-01-06	188.19	185.15
1994-01-07	188.07	185.15
1994-01-08	187.97	185.15
1994-01-09	187.86	185.15
1994-01-10	187.76	185.15
1994-01-11	187.66	185.15
1994-01-12	187.56	185.15
1994-01-13	187.46	185.15
1994-01-14	187.37	185.15
1994-01-15	187.28	185.15
1994-01-16	187.19	185.15
1994-01-17	187.1	185.15
1994-01-18	187.02	185.15
1994-01-19	186.93	185.15
1994-01-20	186.85	185.15
1994-01-21	186.78	185.15
1994-01-22	186.7	185.15
1994-01-23	186.62	185.15
1994-01-24	186.55	185.15
1994-01-25	186.48	185.15
1994-01-26	186.41	185.15
1994-01-27	186.34	185.15
1994-01-28	186.27	185.15
1994-01-29	186.21	185.15
1994-01-30	186.14	185.15
1994-01-31	186.08	185.15
1994-02-01	186.02	185.15
1994-02-02	185.96	185.15
1994-02-03	185.9	185.15
1994-02-04	185.85	185.15
1994-02-05	185.79	185.15
1994-02-06	185.74	185.15
1994-02-07	185.69	185.15
1994-02-08	185.63	185.15
1994-02-09	185.58	185.15
1994-02-10	185.54	185.15
1994-02-11	185.49	185.15
1994-02-12	185.44	185.15
1994-02-13	185.4	185.15
1994-02-14	185.35	185.15
1994-02-15	185.31	185.15
1994-02-16	185.27	185.15
1994-02-17	185.22	185.15
1994-02-18	185.18	185.15
1994-02-19	185.14	185.15
1994-02-20	185.11	185.15
1994-02-21	185.07	185.15
1994-02-22	185.03	185.15
1994-02-23	185	185.15
1994-02-24	184.96	185.15
1994-02-25	184.93	185.15
1994-02-26	184.89	185.15
1994-02-27	184.86	185.15
1994-02-28	184.83	185.15
1994-03-01	186.8	185.15
1994-03-02	186.77	185.15
1994-03-03	186.73	185.15
1994-03-04	187.72	185.15
1994-03-05	188.85	185.15
1994-03-06	188.93	185.15
1994-03-07	189.28	185.15
1994-03-08	189.21	185.15
1994-03-09	189.13	185.15
1994-03-10	189.05	185.15
1994-03-11	188.96	185.15
1994-03-12	188.87	185.15
1994-03-13	188.78	185.15
1994-03-14	188.68	185.15
1994-03-15	188.68	185.15
1994-03-16	188.58	185.15
1994-03-17	188.48	185.15
1994-03-18	188.38	185.134
1994-03-19	189.08	185.11
1994-03-20	189.99	185.11
1994-03-21	189.21	185.109
1994-03-22	188.64	185.109
1994-03-23	188.07	185.109
1994-03-24	187.41	185.103
1994-03-25	186.66	185.048
1994-03-26	187.87	184.996
1994-03-27	190.22	184.995
1994-03-28	189.58	184.982
1994-03-29	188.89	184.953
1994-03-30	187.97	184.933
1994-03-31	187.06	184.703
1994-04-01	187.34	186.631
1994-04-02	186.73	188.075
1994-04-03	186.97	188.023
1994-04-04	186.42	187.963
1994-04-05	185.72	187.947
1994-04-06	185.03	187.864
1994-04-07	184.18	187.647
1994-04-08	197.33	189.651
1994-04-09	199.28	196.005
1994-04-10	198.15	195.575
1994-04-11	196.83	194.527
1994-04-12	195.47	193.624
1994-04-13	194.14	192.667
1994-04-14	192.89	192.909
1994-04-15	191.73	193.783
1994-04-16	190.52	192.9
1994-04-17	190.22	191.894
1994-04-18	188.89	190.915
1994-04-19	187.79	190.136
1994-04-20	186.68	189.142
1994-04-21	185.5	187.893
1994-04-22	184.17	186.734
1994-04-23	182.89	185.699
1994-04-24	181.96	185.096
1994-04-25	181.04	185.014
1994-04-26	180.18	184.892
1994-04-27	179.4	184.816
1994-04-28	178.54	184.425
1994-04-29	177.56	183.49
1994-04-30	176.6	182.396
1994-05-01	175.57	180.959
1994-05-02	174.4	179.519
1994-05-03	175.24	180.89
1994-05-04	174.46	181.114
1994-05-05	173.43	180.524
1994-05-06	172.36	179.037
1994-05-07	171.07	177.526
1994-05-08	169.82	176.442
1994-05-09	168.67	175.482
1994-05-10	167.43	174.908
1994-05-11	166.33	174.417
1994-05-12	165.21	174.19
1994-05-13	164.11	175.449
1994-05-14	162.94	174.643
1994-05-15	161.87	173.773
1994-05-16	161.76	172.942
1994-05-17	160.38	174.189
1994-05-18	161.74	174.56
1994-05-19	171.69	176.295
1994-05-20	176.01	180.694
1994-05-21	174.22	181.314
1994-05-22	176.98	180.482
1994-05-23	176.44	180.349
1994-05-24	174.53	180.165
1994-05-25	173.13	179.126
1994-05-26	171.16	177.201
1994-05-27	169.02	175.043
1994-05-28	166.77	173.798
1994-05-29	164.68	172.988
1994-05-30	162.72	173.23
1994-05-31	160.6	172.787
1994-06-01	158.63	171.577
1994-06-02	156.66	170.348
1994-06-03	154.51	169.246
1994-06-04	152.38	167.929
1994-06-05	151.95	167.113
1994-06-06	149.88	169.473
1994-06-07	147.9	168.246
1994-06-08	146.72	166.984
1994-06-09	150.96	167.251
1994-06-10	152.15	168.923
1994-06-11	153.27	169.621
1994-06-12	149.23	168.499
1994-06-13	152.16	167.2
1994-06-14	149.84	168.413
1994-06-15	145.97	167.075
1994-06-16	142.19	165.77
1994-06-17	138.32	164.101
1994-06-18	137.35	163.129
1994-06-19	135.13	165.941
1994-06-20	131.25	167.216
1994-06-21	129.48	166.197
1994-06-22	125.56	165.26
1994-06-23	123.27	163.668
1994-06-24	121.45	162.839
1994-06-25	136.03	163.649
1994-06-26	132.06	167.506
1994-06-27	132.94	167.148
1994-06-28	129.4	167.644
1994-06-29	125.78	169.379
1994-06-30	121.94	170.518
1994-07-01	118.32	169.096
1994-07-02	114.66	167.244
1994-07-03	127.72	168.629
1994-07-04	123.75	168.74
1994-07-05	119.12	166.877
1994-07-06	114.79	165.187
1994-07-07	110.76	163.782
1994-07-08	106.6	162.675
1994-07-09	102.4	161.12
1994-07-10	99.29	160.929
1994-07-11	94.98	162.903
1994-07-12	90.97	161.158
1994-07-13	88.69	159.892
1994-07-14	85.65	160.245
1994-07-15	87.6	160.325
1994-07-16	84.35	159.292
1994-07-17	83.49	159.846
1994-07-18	81.82	158.657
1994-07-19	77.81	157.334
1994-07-20	79.17	157.364
1994-07-21	75.16	156.314
1994-07-22	71.1	154.594
1994-07-23	67.29	152.832
1994-07-24	63.72	151.054
1994-07-25	60.29	149.498
1994-07-26	56.82	148.133
1994-07-27	53.41	146.438
1994-07-28	49.96	144.593
1994-07-29	46.64	142.957
1994-07-30	49.43	144.24
1994-07-31	46.38	143.817
1994-08-01	43.16	142.276
1994-08-02	40.33	141.524
1994-08-03	37.92	140.956
1994-08-04	35.44	139.317
1994-08-05	32.81	137.518
1994-08-06	53.61	139.017
1994-08-07	60.24	140.882
1994-08-08	57.5	139.738
1994-08-09	54.72	138.223
1994-08-10	51.85	136.731
1994-08-11	57.26	136.702
1994-08-12	55.35	142.125
1994-08-13	52.67	142.593
1994-08-14	49.88	141.141
1994-08-15	46.92	139.448
1994-08-16	44.04	137.881
1994-08-17	41.44	137.584
1994-08-18	47.35	138.887
1994-08-19	47.68	138.786
1994-08-20	46.8	137.362
1994-08-21	45.92	135.744
1994-08-22	45.08	134.318
1994-08-23	44.25	133.161
1994-08-24	44.67	132.765
1994-08-25	46.89	132.333
1994-08-26	51.73	132.006
1994-08-27	60.14	136.076
1994-08-28	60.36	137.15
1994-08-29	70.83	136.113
1994-08-30	69.97	135.276
1994-08-31	69.17	134.322
1994-09-01	68.18	134.181
1994-09-02	67.22	133.454
1994-09-03	82.14	136.953
1994-09-04	81.09	141.738
1994-09-05	80.54	144.352
1994-09-06	79.4	143.805
1994-09-07	78.31	143.23
1994-09-08	77.23	142.653
1994-09-09	76.18	142.176
1994-09-10	75.12	141.649
1994-09-11	81.7	142.396
1994-09-12	81.02	142.767
1994-09-13	80.13	142.149
1994-09-14	82.27	141.658
1994-09-15	88.96	143.464
1994-09-16	87.99	143.295
1994-09-17	87.01	142.737
1994-09-18	86.09	142.149
1994-09-19	85.18	141.495
1994-09-20	90.36	141.09
1994-09-21	90.81	142.739
1994-09-22	90.09	146.748
1994-09-23	89.25	146.565
1994-09-24	88.5	146.132
1994-09-25	87.88	145.683
1994-09-26	87.24	145.191
1994-09-27	86.63	144.788
1994-09-28	86.04	144.357
1994-09-29	85.47	143.844
1994-09-30	84.94	143.411
1994-10-01	84.63	143.08
1994-10-02	84.12	142.848
1994-10-03	83.67	142.619
1994-10-04	83.43	142.319
1994-10-05	82.94	141.993
1994-10-06	115.03	155.172
1994-10-07	118.6	176.438
1994-10-08	118.22	176.844
1994-10-09	117.61	177.071
1994-10-10	116.93	176.345
1994-10-11	116.31	175.68
1994-10-12	115.74	175.135
1994-10-13	115.63	174.869
1994-10-14	115.08	174.636
1994-10-15	114.92	176.695
1994-10-16	120.38	177.826
1994-10-17	134.22	193.238
1994-10-18	161.8	214.849
1994-10-19	163.47	225.906
1994-10-20	162.91	225.682
1994-10-21	162.95	225.126
1994-10-22	164.86	224.68
1994-10-23	164.43	224.463
1994-10-24	164.04	224.375
1994-10-25	163.66	224.212
1994-10-26	163.21	223.805
1994-10-27	162.72	225.273
1994-10-28	162.89	226.948
1994-10-29	162.49	228.015
1994-10-30	162.18	227.595
1994-10-31	161.88	227.168
1994-11-01	162.4	226.874
1994-11-02	162.3	226.875
1994-11-03	162.05	226.875
1994-11-04	161.79	226.875
1994-11-05	161.51	226.875
1994-11-06	161.26	226.875
1994-11-07	160.98	226.875
1994-11-08	160.73	226.799
1994-11-09	160.48	226.629
1994-11-10	160.25	226.478
1994-11-11	160.03	226.4
1994-11-12	159.81	226.399
1994-11-13	159.6	226.397
1994-11-14	159.41	226.394
1994-11-15	159.21	226.331
1994-11-16	159.02	226.246
1994-11-17	158.87	226.232
1994-11-18	158.75	226.232
1994-11-19	158.63	226.232
1994-11-20	158.5	226.232
1994-11-21	158.39	226.232
1994-11-22	158.29	226.232
1994-11-23	158.18	226.232
1994-11-24	158.05	226.232
1994-11-25	157.98	226.232
1994-11-26	157.91	226.232
1994-11-27	157.81	226.232
1994-11-28	157.72	226.232
1994-11-29	157.65	226.232
1994-11-30	157.55	226.232
1994-12-01	157.89	226.232
1994-12-02	157.91	226.232
1994-12-03	157.84	226.232
1994-12-04	157.8	226.232
1994-12-05	157.77	226.232
1994-12-06	157.73	226.232
1994-12-07	157.7	226.232
1994-12-08	157.64	226.232
1994-12-09	157.6	226.232
1994-12-10	157.57	226.232
1994-12-11	157.54	226.232
1994-12-12	157.52	226.232
1994-12-13	157.48	226.232
1994-12-14	157.44	226.232
1994-12-15	157.39	226.232
1994-12-16	157.35	226.232
1994-12-17	157.3	226.232
1994-12-18	157.26	226.232
1994-12-19	157.21	226.232
1994-12-20	157.14	226.232
1994-12-21	157.06	226.232
1994-12-22	156.99	226.232
1994-12-23	156.92	226.232
1994-12-24	156.87	226.232
1994-12-25	156.81	226.232
1994-12-26	156.76	226.232
1994-12-27	156.71	226.232
1994-12-28	156.66	226.232
1994-12-29	156.6	226.232
1994-12-30	156.55	226.232
1994-12-31	156.52	226.232
1995-01-01	156.49	226.232
1995-01-02	156.49	226.232
1995-01-03	156.49	226.232
1995-01-04	156.49	226.232
1995-01-05	156.49	226.232
1995-01-06	156.49	226.232
1995-01-07	156.49	226.232
1995-01-08	156.49	226.232
1995-01-09	156.49	226.232
1995-01-10	156.49	226.232
1995-01-11	156.49	226.232
1995-01-12	156.49	226.232
1995-01-13	156.49	226.232
1995-01-14	156.49	226.232
1995-01-15	156.49	226.232
1995-01-16	156.49	226.232
1995-01-17	156.49	226.232
1995-01-18	156.49	226.232
1995-01-19	156.49	226.232
1995-01-20	156.49	226.232
1995-01-21	156.49	226.232
1995-01-22	156.49	226.232
1995-01-23	156.49	226.232
1995-01-24	156.49	226.232
1995-01-25	156.49	226.232
1995-01-26	156.49	226.232
1995-01-27	156.49	226.232
1995-01-28	156.49	226.232
1995-01-29	156.49	226.232
1995-01-30	158.49	226.232
1995-01-31	158.49	226.232
1995-02-01	158.49	226.232
1995-02-02	158.49	226.232
1995-02-03	158.49	226.232
1995-02-04	158.49	226.232
1995-02-05	158.49	226.232
1995-02-06	158.49	226.232
1995-02-07	158.49	226.232
1995-02-08	158.49	226.232
1995-02-09	158.49	226.232
1995-02-10	158.49	226.232
1995-02-11	158.49	226.232
1995-02-12	158.49	226.232
1995-02-13	158.49	226.232
1995-02-14	158.49	226.232
1995-02-15	158.49	226.232
1995-02-16	158.49	226.232
1995-02-17	158.49	226.232
1995-02-18	158.49	226.232
1995-02-19	158.49	226.232
1995-02-20	158.49	226.232
1995-02-21	158.49	226.232
1995-02-22	158.49	226.232
1995-02-23	158.49	226.232
1995-02-24	158.49	226.232
1995-02-25	158.49	226.232
1995-02-26	158.49	226.232
1995-02-27	158.49	226.232
1995-02-28	158.49	226.232
1995-03-01	158.49	226.232
1995-03-02	158.49	226.232
1995-03-03	158.49	226.232
1995-03-04	158.49	226.232
1995-03-05	158.49	226.232
1995-03-06	158.49	226.232
1995-03-07	158.49	226.232
1995-03-08	158.49	226.232
1995-03-09	158.49	226.232
1995-03-10	158.49	226.232
1995-03-11	159.49	226.232
1995-03-12	159.49	226.232
1995-03-13	159.49	226.232
1995-03-14	159.49	226.232
1995-03-15	159.84	226.232
1995-03-16	193.33	226.232
1995-03-17	195.33	226.232
1995-03-18	195.33	226.232
1995-03-19	195.33	226.232
1995-03-20	195.33	226.232
1995-03-21	195.33	226.232
1995-03-22	196.33	226.232
1995-03-23	196.45	226.232
1995-03-24	197.08	226.232
1995-03-25	198.32	226.232
1995-03-26	199.21	226.232
1995-03-27	199.63	226.232
1995-03-28	199.75	226.232
1995-03-29	199.14	226.232
1995-03-30	198.53	226.232
1995-03-31	200.84	226.232
1995-04-01	200.15	226.232
1995-04-02	201.35	226.232
1995-04-03	200.96	226.232
1995-04-04	200.27	226.232
1995-04-05	199.98	226.232
1995-04-06	199.69	226.232
1995-04-07	199.38	226.232
1995-04-08	199.06	226.232
1995-04-09	198.75	226.232
1995-04-10	198.43	226.232
1995-04-11	198.35	226.232
1995-04-12	198.18	226.232
1995-04-13	196.85	226.232
1995-04-14	196.52	226.188
1995-04-15	195.24	226.101
1995-04-16	194.03	226.037
1995-04-17	192.78	226.037
1995-04-18	192.57	225.87
1995-04-19	191.36	225.409
1995-04-20	190.06	224.374
1995-04-21	188.91	223.38
1995-04-22	188.64	222.545
1995-04-23	187.43	221.488
1995-04-24	186.33	220.421
1995-04-25	185.26	219.681
1995-04-26	184.25	219.53
1995-04-27	183.28	219.53
1995-04-28	182.22	220.221
1995-04-29	181.08	220.908
1995-04-30	180	220.696
1995-05-01	178.91	219.941
1995-05-02	178.86	219.351
1995-05-03	180.75	219.352
1995-05-04	180.53	219.423
1995-05-05	180.36	218.651
1995-05-06	179.09	219.113
1995-05-07	188.72	219.687
1995-05-08	187.16	242.648
1995-05-09	185.65	261.959
1995-05-10	184.1	261.322
1995-05-11	186.95	260.229
1995-05-12	199.84	262
1995-05-13	198.4	262
1995-05-14	196.89	261.603
1995-05-15	196.75	261.361
1995-05-16	196.31	261.923
1995-05-17	194.74	261.231
1995-05-18	192.95	260.225
1995-05-19	192.48	260.088
1995-05-20	190.92	259.257
1995-05-21	205.86	259.856
1995-05-22	223.16	261.993
1995-05-23	220.59	261.274
1995-05-24	218.13	259.662
1995-05-25	215.52	257.69
1995-05-26	212.94	255.419
1995-05-27	210.35	253.658
1995-05-28	207.75	251.843
1995-05-29	205.06	249.88
1995-05-30	202.34	247.949
1995-05-31	199.68	246.104
1995-06-01	197.2	244.316
1995-06-02	194.78	242.55
1995-06-03	195.63	240.734
1995-06-04	193.26	238.689
1995-06-05	190.38	236.422
1995-06-06	190.66	236.268
1995-06-07	188.64	237.087
1995-06-08	186.4	235.047
1995-06-09	183.97	232.464
1995-06-10	181.72	230.2
1995-06-11	179.41	227.97
1995-06-12	177	225.644
1995-06-13	174.56	223.14
1995-06-14	172.1	222.169
1995-06-15	169.6	220.41
1995-06-16	167.04	218.203
1995-06-17	164.46	215.991
1995-06-18	161.89	214.608
1995-06-19	157.41	212.645
1995-06-20	157.8	211.1
1995-06-21	160.28	212.268
1995-06-22	156.18	210.43
1995-06-23	152.36	213.359
1995-06-24	156.31	212.123
1995-06-25	152.7	212
1995-06-26	148.65	210.275
1995-06-27	144.54	207.951
1995-06-28	140.4	206.182
1995-06-29	143.02	207.998
1995-06-30	140.18	209.57
1995-07-01	136.47	208.058
1995-07-02	132.59	205.89
1995-07-03	141.57	203.787
1995-07-04	137.66	201.197
1995-07-05	133.9	199.26
1995-07-06	130.1	197.58
1995-07-07	127.07	195.79
1995-07-08	123.15	193.411
1995-07-09	119.18	190.932
1995-07-10	115.23	188.021
1995-07-11	110.46	184.773
1995-07-12	105.65	181.87
1995-07-13	101.55	179.406
1995-07-14	97.26	176.403
1995-07-15	101.66	174.689
1995-07-16	110.52	175.115
1995-07-17	106.8	174.58
1995-07-18	116.98	172.825
1995-07-19	114.89	172.451
1995-07-20	112.17	170.524
1995-07-21	108.58	168.588
1995-07-22	104.44	166.692
1995-07-23	100.52	165.609
1995-07-24	98.01	164.739
1995-07-25	94	162.874
1995-07-26	89.93	161.054
1995-07-27	86.55	159.397
1995-07-28	82.64	157.66
1995-07-29	78.85	156.581
1995-07-30	77.28	155.81
1995-07-31	73.75	153.996
1995-08-01	70.26	152.541
1995-08-02	66.66	151.654
1995-08-03	63.32	149.954
1995-08-04	60	148.07
1995-08-05	56.62	146.316
1995-08-06	53.2	144.94
1995-08-07	49.84	143.227
1995-08-08	47.52	143.519
1995-08-09	44.9	143.01
1995-08-10	42.2	141.378
1995-08-11	39.6	139.781
1995-08-12	37.08	138.199
1995-08-13	43.37	137.309
1995-08-14	40.86	146.337
1995-08-15	38.03	145.141
1995-08-16	35.3	143.527
1995-08-17	32.62	142.076
1995-08-18	36.11	143.448
1995-08-19	33.61	144.019
1995-08-20	31.27	142.354
1995-08-21	29.03	140.69
1995-08-22	34.38	141.305
1995-08-23	34.01	143.662
1995-08-24	33.63	142.204
1995-08-25	33.25	140.769
1995-08-26	32.9	139.65
1995-08-27	33.14	138.491
1995-08-28	32.8	137.191
1995-08-29	52.17	137.862
1995-08-30	51.35	138.618
1995-08-31	50.6	137.318
1995-09-01	49.92	136.292
1995-09-02	49.21	135.624
1995-09-03	48.49	135.009
1995-09-04	47.79	134.442
1995-09-05	64.76	136.742
1995-09-06	63.87	142.488
1995-09-07	63.11	142.678
1995-09-08	62.32	141.93
1995-09-09	61.57	141.361
1995-09-10	60.75	140.832
1995-09-11	59.93	140.289
1995-09-12	59.09	139.792
1995-09-13	58.41	139.371
1995-09-14	57.76	138.98
1995-09-15	57.08	138.502
1995-09-16	56.51	138.019
1995-09-17	55.95	137.683
1995-09-18	55.47	138.965
1995-09-19	55	140.949
1995-09-20	54.6	145.031
1995-09-21	54.21	145.159
1995-09-22	53.79	145.058
1995-09-23	53.38	144.846
1995-09-24	52.91	144.623
1995-09-25	52.45	144.39
1995-09-26	51.99	143.971
1995-09-27	51.51	143.411
1995-09-28	51.05	145.623
1995-09-29	50.61	146.162
1995-09-30	50.24	145.704
1995-10-01	49.89	145.325
1995-10-02	50.97	144.912
1995-10-03	50.82	144.56
1995-10-04	50.53	144.173
1995-10-05	50.21	143.881
1995-10-06	49.9	143.663
1995-10-07	49.63	143.351
1995-10-08	49.34	142.882
1995-10-09	49.27	142.577
1995-10-10	48.97	142.329
1995-10-11	48.66	141.969
1995-10-12	48.38	141.604
1995-10-13	69.55	142.174
1995-10-14	69.16	146.686
1995-10-15	68.79	146.483
1995-10-16	68.41	146.176
1995-10-17	68.02	145.988
1995-10-18	74.32	147.784
1995-10-19	84.38	163.073
1995-10-20	84	164.521
1995-10-21	83.86	164.371
1995-10-22	83.51	164.227
1995-10-23	83.37	164.007
1995-10-24	83.24	163.73
1995-10-25	82.91	163.493
1995-10-26	82.8	163.29
1995-10-27	82.49	163.052
1995-10-28	85.61	168.434
1995-10-29	85.98	170.123
1995-10-30	85.76	170.247
1995-10-31	85.55	170.363
1995-11-01	85.33	173.488
1995-11-02	85.16	175.737
1995-11-03	85.03	175.737
1995-11-04	84.9	175.737
1995-11-05	84.75	175.737
1995-11-06	84.59	175.737
1995-11-07	84.46	175.737
1995-11-08	84.35	175.737
1995-11-09	84.24	175.737
1995-11-10	84.15	175.737
1995-11-11	84.09	175.737
1995-11-12	84.03	175.737
1995-11-13	83.94	175.737
1995-11-14	83.83	175.737
1995-11-15	83.74	175.737
1995-11-16	83.65	175.737
1995-11-17	83.54	175.737
1995-11-18	83.43	175.737
1995-11-19	83.3	175.737
1995-11-20	83.6	175.737
1995-11-21	83.53	175.737
1995-11-22	83.47	175.737
1995-11-23	83.43	175.737
1995-11-24	83.43	175.737
1995-11-25	83.43	175.737
1995-11-26	83.43	175.737
1995-11-27	83.43	175.737
1995-11-28	83.43	175.737
1995-11-29	83.43	175.737
1995-11-30	83.43	175.737
1995-12-01	83.43	175.737
1995-12-02	83.43	175.737
1995-12-03	83.43	175.737
1995-12-04	86.43	175.737
1995-12-05	86.43	175.737
1995-12-06	86.43	175.737
1995-12-07	86.43	175.737
1995-12-08	86.43	175.737
1995-12-09	86.43	175.737
1995-12-10	86.43	175.737
1995-12-11	86.43	175.737
1995-12-12	86.43	175.737
1995-12-13	86.43	175.737
1995-12-14	86.43	175.737
1995-12-15	86.43	175.737
1995-12-16	86.43	175.737
1995-12-17	86.43	175.737
1995-12-18	86.43	175.737
1995-12-19	86.43	175.737
1995-12-20	86.43	175.737
1995-12-21	86.43	175.737
1995-12-22	86.43	175.737
1995-12-23	86.43	175.737
1995-12-24	86.43	175.737
1995-12-25	86.43	175.737
1995-12-26	87.43	175.737
1995-12-27	87.43	175.737
1995-12-28	87.43	175.737
1995-12-29	87.43	175.737
1995-12-30	87.43	175.737
1995-12-31	87.43	175.737
1996-01-01	87.43	175.737
1996-01-02	87.43	175.737
1996-01-03	87.43	175.737
1996-01-04	87.43	175.737
1996-01-05	87.43	175.737
1996-01-06	87.43	175.737
1996-01-07	87.43	175.737
1996-01-08	87.43	175.737
1996-01-09	87.43	175.737
1996-01-10	87.43	175.737
1996-01-11	87.43	175.737
1996-01-12	87.43	175.737
1996-01-13	87.43	175.737
1996-01-14	87.43	175.737
1996-01-15	87.43	175.737
1996-01-16	87.43	175.737
1996-01-17	87.43	175.737
1996-01-18	87.43	175.737
1996-01-19	87.43	175.737
1996-01-20	87.43	175.737
1996-01-21	87.43	175.737
1996-01-22	87.43	175.737
1996-01-23	87.43	175.737
1996-01-24	87.43	175.737
1996-01-25	87.43	175.737
1996-01-26	87.43	175.737
1996-01-27	87.43	175.737
1996-01-28	87.43	175.737
1996-01-29	87.43	175.737
1996-01-30	87.43	175.737
1996-01-31	87.43	175.737
1996-02-01	87.43	175.737
1996-02-02	87.43	175.737
1996-02-03	87.43	175.737
1996-02-04	87.43	175.737
1996-02-05	87.43	175.737
1996-02-06	87.43	175.737
1996-02-07	87.43	175.737
1996-02-08	87.43	175.737
1996-02-09	93.43	175.737
1996-02-10	95.43	175.737
1996-02-11	95.43	175.737
1996-02-12	95.43	175.737
1996-02-13	95.43	175.737
1996-02-14	95.43	175.737
1996-02-15	95.43	175.737
1996-02-16	95.43	175.737
1996-02-17	95.43	175.737
1996-02-18	95.43	175.737
1996-02-19	95.43	175.737
1996-02-20	95.43	175.737
1996-02-21	95.43	175.737
1996-02-22	101.43	175.737
1996-02-23	101.43	175.737
1996-02-24	101.43	175.737
1996-02-25	101.43	175.737
1996-02-26	101.43	175.737
1996-02-27	101.43	175.737
1996-02-28	101.43	175.737
1996-02-29	101.43	175.737
1996-03-01	101.43	175.737
1996-03-02	101.43	175.737
1996-03-03	101.43	175.737
1996-03-04	101.43	175.737
1996-03-05	101.43	175.737
1996-03-06	101.43	175.737
1996-03-07	101.43	175.737
1996-03-08	101.43	175.737
1996-03-09	101.43	175.737
1996-03-10	101.43	175.737
1996-03-11	101.43	175.737
1996-03-12	102.66	175.737
1996-03-13	103.24	175.737
1996-03-14	103.25	175.737
1996-03-15	104.17	175.737
1996-03-16	104.18	175.737
1996-03-17	106.46	175.737
1996-03-18	106.46	175.737
1996-03-19	106.46	175.737
1996-03-20	106.46	175.737
1996-03-21	106.46	175.737
1996-03-22	106.46	175.737
1996-03-23	106.46	175.737
1996-03-24	106.46	175.737
1996-03-25	106.46	175.737
1996-03-26	106.46	175.737
1996-03-27	106.46	175.737
1996-03-28	106.46	175.737
1996-03-29	106.46	175.737
1996-03-30	106.46	175.737
1996-03-31	106.46	175.737
1996-04-01	106.46	175.737
1996-04-02	106.46	175.737
1996-04-03	106.46	175.737
1996-04-04	106.46	175.737
1996-04-05	106.46	175.737
1996-04-06	106.46	175.737
1996-04-07	106.46	175.737
1996-04-08	106.46	175.737
1996-04-09	113.25	175.737
1996-04-10	121.12	175.737
1996-04-11	121.88	175.737
1996-04-12	121.9	175.737
1996-04-13	121.24	175.737
1996-04-14	124.6	175.737
1996-04-15	123.82	175.737
1996-04-16	123	175.737
1996-04-17	122.09	175.737
1996-04-18	122.23	175.737
1996-04-19	126.52	175.737
1996-04-20	127.77	175.737
1996-04-21	130.02	175.737
1996-04-22	129.18	175.737
1996-04-23	128.32	175.737
1996-04-24	150.15	175.737
1996-04-25	157.2	175.737
1996-04-26	156.32	175.737
1996-04-27	155.37	175.737
1996-04-28	154.22	175.737
1996-04-29	153.02	175.737
1996-04-30	151.82	175.737
1996-05-01	150.8	175.71
1996-05-02	149.77	175.516
1996-05-03	148.7	175.161
1996-05-04	147.59	174.699
1996-05-05	146.38	173.942
1996-05-06	145.17	173.102
1996-05-07	144.03	172.303
1996-05-08	143.02	171.586
1996-05-09	142.1	171.343
1996-05-10	141.21	171.067
1996-05-11	140.16	170.47
1996-05-12	140.07	170.117
1996-05-13	139.89	170.117
1996-05-14	142.68	171.66
1996-05-15	145.48	175.38
1996-05-16	170.05	176.404
1996-05-17	169.97	182.137
1996-05-18	176.24	187.229
1996-05-19	188.5	189.456
1996-05-20	186.82	194.1
1996-05-21	186.46	192.964
1996-05-22	184.95	192.231
1996-05-23	183.37	190.981
1996-05-24	181.82	189.322
1996-05-25	180.2	187.437
1996-05-26	178.53	185.417
1996-05-27	176.81	183.688
1996-05-28	175.11	181.931
1996-05-29	173.4	179.905
1996-05-30	173.13	179.081
1996-05-31	182.5	179.281
1996-06-01	181.79	180.285
1996-06-02	180.45	179.522
1996-06-03	178.76	178.317
1996-06-04	177.01	176.633
1996-06-05	193.69	181.855
1996-06-06	191.71	182.749
1996-06-07	189.7	180.493
1996-06-08	187.57	178.292
1996-06-09	185.41	176.089
1996-06-10	182.76	174.327
1996-06-11	180.16	172.898
1996-06-12	177.72	171.357
1996-06-13	175.29	169.832
1996-06-14	174.6	169.309
1996-06-15	172.24	168.376
1996-06-16	169.98	166.627
1996-06-17	167.65	164.811
1996-06-18	187.46	164.525
1996-06-19	199.81	165.329
1996-06-20	197.24	171.842
1996-06-21	196.36	170.447
1996-06-22	194.23	169.099
1996-06-23	196.21	168.364
1996-06-24	193.87	172.102
1996-06-25	195.01	171.538
1996-06-26	192.45	172.194
1996-06-27	189.69	170.739
1996-06-28	207.29	170.171
1996-06-29	202.75	174.5
1996-06-30	198.49	173.203
1996-07-01	194.14	171.2
1996-07-02	189.84	168.951
1996-07-03	185.45	166.729
1996-07-04	180.97	165.008
1996-07-05	176.94	164.081
1996-07-06	172.76	162.907
1996-07-07	185.79	162.207
1996-07-08	182.15	162.193
1996-07-09	178.28	160.319
1996-07-10	190.81	159.09
1996-07-11	186.85	158.463
1996-07-12	185.26	158.159
1996-07-13	181.03	156.655
1996-07-14	176.96	155.103
1996-07-15	172.88	153.225
1996-07-16	170.05	151.744
1996-07-17	178.41	152.137
1996-07-18	187.05	150.451
1996-07-19	190.61	150.102
1996-07-20	199.38	151.77
1996-07-21	194.79	150.848
1996-07-22	190.51	149.067
1996-07-23	188.13	147.645
1996-07-24	183.95	147.359
1996-07-25	179.58	146.508
1996-07-26	177.15	145.67
1996-07-27	172.99	145.525
1996-07-28	168.87	144.215
1996-07-29	168.18	143
1996-07-30	164.1	141.864
1996-07-31	159.79	140.405
1996-08-01	155.69	138.662
1996-08-02	151.67	137.046
1996-08-03	149.45	136.484
1996-08-04	150.31	140.896
1996-08-05	146.1	141.797
1996-08-06	142.04	140.091
1996-08-07	138.52	139.19
1996-08-08	134.8	138.212
1996-08-09	131.13	136.735
1996-08-10	127.19	135.22
1996-08-11	123.43	133.705
1996-08-12	119.82	132.29
1996-08-13	116.43	130.927
1996-08-14	112.81	129.547
1996-08-15	109.11	127.958
1996-08-16	105.43	126.311
1996-08-17	101.8	124.817
1996-08-18	101.76	126.552
1996-08-19	98.68	126.876
1996-08-20	96.57	127.802
1996-08-21	110.94	130.783
1996-08-22	107.61	134.517
1996-08-23	104.29	133.009
1996-08-24	100.8	131.512
1996-08-25	97.76	130.187
1996-08-26	94.78	128.893
1996-08-27	91.58	127.479
1996-08-28	88.43	126.151
1996-08-29	85.45	124.866
1996-08-30	82.32	123.528
1996-08-31	79.31	122.573
1996-09-01	78.83	126.731
1996-09-02	76.01	127.06
1996-09-03	73.32	126.505
1996-09-04	85.52	127.047
1996-09-05	88.02	133.367
1996-09-06	87.69	134.133
1996-09-07	86.99	133.933
1996-09-08	86.28	133.229
1996-09-09	85.99	136.463
1996-09-10	85.39	138.054
1996-09-11	85.04	141.355
1996-09-12	84.49	141.27
1996-09-13	84.16	140.907
1996-09-14	83.67	140.407
1996-09-15	83.17	139.912
1996-09-16	82.69	139.441
1996-09-17	82.21	139.015
1996-09-18	81.95	138.614
1996-09-19	81.87	138.202
1996-09-20	82.81	138.442
1996-09-21	83.56	138.601
1996-09-22	83.1	142.042
1996-09-23	84.47	141.987
1996-09-24	84.04	143.294
1996-09-25	83.6	143.17
1996-09-26	91.41	146.459
1996-09-27	91.11	146.902
1996-09-28	90.66	146.718
1996-09-29	90.24	146.367
1996-09-30	91.82	147.422
1996-10-01	96.02	151.963
1996-10-02	95.91	154.66
1996-10-03	95.5	154.396
1996-10-04	95.01	154.013
1996-10-05	94.48	153.646
1996-10-06	94.07	153.306
1996-10-07	93.88	152.953
1996-10-08	93.45	152.585
1996-10-09	93.1	152.24
1996-10-10	92.69	151.896
1996-10-11	92.31	151.562
1996-10-12	91.92	151.229
1996-10-13	91.59	150.91
1996-10-14	91.26	150.786
1996-10-15	90.9	151.279
1996-10-16	90.59	150.956
1996-10-17	90.32	150.716
1996-10-18	90.08	150.538
1996-10-19	89.81	150.281
1996-10-20	94.35	151.626
1996-10-21	99.3	154.03
1996-10-22	102.03	157.93
1996-10-23	101.76	157.933
1996-10-24	101.88	157.805
1996-10-25	102	157.645
1996-10-26	101.74	157.6
1996-10-27	101.48	157.528
1996-10-28	101.42	157.359
1996-10-29	101.21	157.152
1996-10-30	101.08	157.044
1996-10-31	100.92	157.035
1996-11-01	100.78	157.035
1996-11-02	100.59	157.035
1996-11-03	100.4	157.035
1996-11-04	100.23	157.033
1996-11-05	104.07	157.03
1996-11-06	113.9	157.03
1996-11-07	116.7	157.03
1996-11-08	116.51	157.03
1996-11-09	116.37	157.03
1996-11-10	116.25	157.03
1996-11-11	116.16	157.03
1996-11-12	116.07	157.03
1996-11-13	115.99	157.03
1996-11-14	115.91	157.03
1996-11-15	115.78	157.03
1996-11-16	115.68	157.03
1996-11-17	115.68	157.03
1996-11-18	115.68	157.03
1996-11-19	115.68	157.03
1996-11-20	115.68	157.03
1996-11-21	115.68	157.03
1996-11-22	115.68	157.03
1996-11-23	115.68	157.03
1996-11-24	115.68	157.03
1996-11-25	115.68	157.03
1996-11-26	115.68	157.03
1996-11-27	115.68	157.03
1996-11-28	115.68	157.03
1996-11-29	115.68	157.03
1996-11-30	115.68	157.03
1996-12-01	115.68	157.03
1996-12-02	115.68	157.03
1996-12-03	115.68	157.03
1996-12-04	115.68	157.03
1996-12-05	115.68	157.03
1996-12-06	115.68	157.03
1996-12-07	115.68	157.03
1996-12-08	115.68	157.03
1996-12-09	115.68	157.03
1996-12-10	115.68	157.03
1996-12-11	115.68	157.03
1996-12-12	115.68	157.03
1996-12-13	115.68	157.03
1996-12-14	115.68	157.03
1996-12-15	115.68	157.03
1996-12-16	115.68	157.03
1996-12-17	115.68	157.03
1996-12-18	115.68	157.03
1996-12-19	115.68	157.03
1996-12-20	115.68	157.03
1996-12-21	115.68	157.03
1996-12-22	115.68	157.03
1996-12-23	115.68	157.03
1996-12-24	115.68	157.03
1996-12-25	115.68	157.03
1996-12-26	115.68	157.03
1996-12-27	115.68	157.03
1996-12-28	115.68	157.03
1996-12-29	115.68	157.03
1996-12-30	115.68	157.03
1996-12-31	115.68	157.03
1997-01-01	115.68	157.03
1997-01-02	115.68	157.03
1997-01-03	115.68	157.03
1997-01-04	115.68	157.03
1997-01-05	115.68	157.03
1997-01-06	115.68	157.03
1997-01-07	115.68	157.03
1997-01-08	115.68	157.03
1997-01-09	115.68	157.03
1997-01-10	115.68	157.03
1997-01-11	115.68	157.03
1997-01-12	115.68	157.03
1997-01-13	115.68	157.03
1997-01-14	115.68	157.03
1997-01-15	115.68	157.03
1997-01-16	115.68	157.03
1997-01-17	115.68	157.03
1997-01-18	115.68	157.03
1997-01-19	115.68	157.03
1997-01-20	115.68	157.03
1997-01-21	115.68	157.03
1997-01-22	115.68	157.03
1997-01-23	115.68	157.03
1997-01-24	115.68	157.03
1997-01-25	115.68	157.03
1997-01-26	115.68	157.03
1997-01-27	115.68	157.03
1997-01-28	115.68	157.03
1997-01-29	115.68	157.03
1997-01-30	115.68	157.03
1997-01-31	115.68	157.03
1997-02-01	115.68	157.03
1997-02-02	115.68	157.03
1997-02-03	115.68	157.03
1997-02-04	115.68	157.03
1997-02-05	115.68	157.03
1997-02-06	115.68	157.03
1997-02-07	115.68	157.03
1997-02-08	115.68	157.03
1997-02-09	115.68	157.03
1997-02-10	115.68	157.03
1997-02-11	115.68	157.03
1997-02-12	115.68	157.03
1997-02-13	115.68	157.03
1997-02-14	115.68	157.03
1997-02-15	115.68	157.03
1997-02-16	115.68	157.03
1997-02-17	116.68	157.03
1997-02-18	116.68	157.03
1997-02-19	116.68	157.03
1997-02-20	116.68	157.03
1997-02-21	116.68	157.03
1997-02-22	116.68	157.03
1997-02-23	116.68	157.03
1997-02-24	116.68	157.03
1997-02-25	118.68	157.03
1997-02-26	118.68	157.03
1997-02-27	118.68	157.03
1997-02-28	118.68	157.03
1997-03-01	118.68	157.03
1997-03-02	118.68	157.03
1997-03-03	118.68	157.03
1997-03-04	118.68	157.03
1997-03-05	118.68	157.03
1997-03-06	118.68	157.03
1997-03-07	118.68	157.03
1997-03-08	118.68	157.03
1997-03-09	118.68	157.03
1997-03-10	118.68	157.03
1997-03-11	118.68	157.03
1997-03-12	118.68	157.03
1997-03-13	118.68	157.03
1997-03-14	118.68	157.03
1997-03-15	118.68	157.03
1997-03-16	118.68	157.03
1997-03-17	118.68	157.03
1997-03-18	118.68	157.03
1997-03-19	118.68	157.03
1997-03-20	118.68	157.03
1997-03-21	118.68	157.03
1997-03-22	118.68	157.03
1997-03-23	118.68	157.03
1997-03-24	122.68	157.03
1997-03-25	122.68	157.03
1997-03-26	123.77	157.03
1997-03-27	128.94	157.03
1997-03-28	132.15	157.03
1997-03-29	132.8	157.03
1997-03-30	132.81	157.03
1997-03-31	133.52	157.03
1997-04-01	135.66	157.03
1997-04-02	137.06	157.03
1997-04-03	140.64	157.03
1997-04-04	141.11	157.03
1997-04-05	142.56	157.03
1997-04-06	142.56	157.03
1997-04-07	142.56	157.03
1997-04-08	142.56	157.03
1997-04-09	142.56	157.03
1997-04-10	142.56	157.03
1997-04-11	142.56	157.03
1997-04-12	142.56	157.03
1997-04-13	143.56	157.03
1997-04-14	152.56	157.03
1997-04-15	152.56	157.03
1997-04-16	152.56	157.03
1997-04-17	155.81	157.03
1997-04-18	164.56	157.03
1997-04-19	163.38	157.03
1997-04-20	162.3	157.03
1997-04-21	161.25	157.03
1997-04-22	160.21	157.03
1997-04-23	159.18	156.954
1997-04-24	158.11	156.718
1997-04-25	183.6	163.729
1997-04-26	201.63	168.851
1997-04-27	200.39	170.444
1997-04-28	211.97	169.881
1997-04-29	210.84	169.517
1997-04-30	209.77	169.411
1997-05-01	208.54	168.887
1997-05-02	207.28	168.14
1997-05-03	206.01	167.773
1997-05-04	207.05	167.774
1997-05-05	205.66	168.523
1997-05-06	204.42	170.993
1997-05-07	207.74	176.04
1997-05-08	212.68	180.735
1997-05-09	210.64	179.946
1997-05-10	208.43	178.941
1997-05-11	207.17	178.082
1997-05-12	206.01	177.992
1997-05-13	206.83	179.454
1997-05-14	205.21	183.447
1997-05-15	203.69	185.017
1997-05-16	201.78	184.829
1997-05-17	203.33	184.433
1997-05-18	201.58	184.209
1997-05-19	199.83	184.053
1997-05-20	198.13	183.669
1997-05-21	198.18	183.149
1997-05-22	196.26	182.65
1997-05-23	194.65	181.831
1997-05-24	192.88	180.422
1997-05-25	191.11	179.036
1997-05-26	189.34	177.559
1997-05-27	187.54	176.075
1997-05-28	185.77	174.806
1997-05-29	184.01	173.445
1997-05-30	182.15	172.119
1997-05-31	180.49	172.413
1997-06-01	178.86	172.379
1997-06-02	177.13	173.778
1997-06-03	175.43	173.053
1997-06-04	173.86	171.809
1997-06-05	172.36	170.665
1997-06-06	170.85	169.502
1997-06-07	169.36	168.381
1997-06-08	167.81	167.265
1997-06-09	165.48	166.188
1997-06-10	163.16	165.137
1997-06-11	160.92	163.91
1997-06-12	158.75	162.604
1997-06-13	157.81	161.361
1997-06-14	155.94	160.808
1997-06-15	153.96	160.037
1997-06-16	163.97	159.185
1997-06-17	161.87	162.207
1997-06-18	174.44	162.949
1997-06-19	172.17	165.815
1997-06-20	169.78	167.243
[truncated: 6,038 more rows]
