# Supplementary material for: Simulating cold-region hydrology in an intensively drained agricultural watershed in Manitoba, Canada, using the Cold Regions Hydrological Model
Source: Copernicus journal article supplement (doi:10.5194/hess-2016-462), 2016-09-27
Supplement: Supplementary file 17 [file Cordeiro2016_PlotDataFig10.xlsx]

## Sheet: Sheet1
	NSE - Wet years										NSE - Dry years
		K storage upland									K storage upland
		0	1	2	4	8	15				0	1	2	4	8	15
K storage drainage network	0	0.27	0.51	0.64	0.7	0.64	0.52		K storage drainage network	0	-16.08	-12.19	-9.96	-7.35	-4.99	-3.5
	1	0.53	0.62	0.67	0.68	0.6	0.49			1	-11.86	-10.67	-9.11	-6.94	-4.8	-3.38
	2	0.66	0.68	0.68	0.64	0.55	0.44			2	-9.37	-8.82	-7.83	-6.22	-4.44	-3.17
	2.5	0.69	0.68	0.67	0.62	0.52	0.42			2.5	-8.45	-8.05	-7.25	-5.86	-4.25	-3.06
	3	0.7	0.68	0.66	0.6	0.5	0.4			3	-7.69	-7.39	-6.73	-5.53	-4.07	-2.96
	4	0.71	0.67	0.63	0.55	0.44	0.35			4	-6.49	-6.32	-5.86	-4.94	-3.75	-2.77
	8	0.6	0.54	0.48	0.39	0.28	0.21			8	-3.94	-3.93	-3.79	-3.43	-2.86	-2.28
	15	0.41	0.36	0.31	0.23	0.14	0.08			15	-2.37	-2.41	-2.39	-2.3	-2.11	-1.83
	20	0.32	0.28	0.23	0.16	0.08	0.03			20	-1.89	-1.93	-1.94	-1.91	-1.81	-1.63
	MB - Wet years								MB - Dry years
		K storage upland									K storage upland
		0	1	2	4	8	15				0	1	2	4	8	15
K storage drainage network	0	0.622	0.3044	0.0907	-0.1465	-0.361	-0.4977		K storage drainage network	0	2.4335	1.8359	1.3802	0.8628	0.4209	0.1219
	1	0.3088	0.1446	-0.0082031	-0.1968	-0.3852	-0.5239			1	1.8014	1.5046	1.1695	0.7602	0.3729	0.0835
	2	0.092	-0.0082956	-0.1187	-0.263	-0.423	-0.5548			2	1.3064	1.1355	0.9133	0.6024	0.2793	0.0214
	2.5	0.0116	-0.0691	-0.1665	-0.2897	-0.4415	-0.5688			2.5	1.1306	0.9991	0.805	0.5298	0.23	-0.0131
	3	-0.059	-0.1245	-0.2036	-0.3162	-0.4592	-0.582			3	0.9819	0.8767	0.7114	0.4637	0.1852	-0.0434
	4	-0.1573	-0.2063	-0.2649	-0.3641	-0.4928	-0.6063			4	0.7445	0.675	0.5473	0.3446	0.106	-0.1002
	8	-0.3901	-0.4109	-0.4439	-0.5057	-0.5938	-0.6795			8	0.2321	0.208	0.1508	0.0402	-0.1104	-0.2558
	15	-0.5807	-0.5898	-0.6068	-0.641	-0.6937	-0.749			15	-0.1508	-0.156	-0.1797	-0.2335	-0.3195	-0.4159
	20	-0.6556	-0.6612	-0.6726	-0.6974	-0.7365	-0.7797			20	-0.2959	-0.2971	-0.3113	-0.3483	-0.4123	-0.4893
