# Supplementary material for: Simulating cold-region hydrology in an intensively drained agricultural watershed in Manitoba, Canada, using the Cold Regions Hydrological Model
Source: Copernicus journal article supplement (doi:10.5194/hess-2016-462), 2016-09-27
Supplement: Supplementary file 19 [file Cordeiro2016_PlotDataFig11.xlsx]

## Sheet: Data_fig11
	Discharge (m^3/s)
Date	Base model	Snow Sublimation Falsification	Blowing Snow Falsification	Frozen Soil Infiltration Falsification	Frozen Soil Infiltration and Blowing Snow Falsification
1990-01-01
1990-01-02
1990-01-03
1990-01-04
1990-01-05
1990-01-06
1990-01-07
1990-01-08
1990-01-09
1990-01-10
1990-01-11
1990-01-12
1990-01-13
1990-01-14
1990-01-15
1990-01-16
1990-01-17
1990-01-18
1990-01-19
1990-01-20
1990-01-21
1990-01-22
1990-01-23
1990-01-24
1990-01-25
1990-01-26
1990-01-27
1990-01-28
1990-01-29
1990-01-30
1990-01-31
1990-02-01
1990-02-02
1990-02-03
1990-02-04
1990-02-05
1990-02-06
1990-02-07
1990-02-08
1990-02-09
1990-02-10
1990-02-11
1990-02-12
1990-02-13
1990-02-14
1990-02-15
1990-02-16
1990-02-17
1990-02-18
1990-02-19
1990-02-20
1990-02-21
1990-02-22
1990-02-23
1990-02-24
1990-02-25
1990-02-26
1990-02-27
1990-02-28
1990-03-01
1990-03-02
1990-03-03
1990-03-04
1990-03-05
1990-03-06
1990-03-07
1990-03-08
1990-03-09
1990-03-10
1990-03-11
1990-03-12
1990-03-13
1990-03-14
1990-03-15
1990-03-16
1990-03-17
1990-03-18
1990-03-19
1990-03-20
1990-03-21
1990-03-22
1990-03-23
1990-03-24
1990-03-25
1990-03-26
1990-03-27
1990-03-28
1990-03-29
1990-03-30
1990-03-31
1990-04-01
1990-04-02
1990-04-03
1990-04-04
1990-04-05
1990-04-06
1990-04-07
1990-04-08
1990-04-09
1990-04-10
1990-04-11
1990-04-12
1990-04-13
1990-04-14
1990-04-15
1990-04-16
1990-04-17
1990-04-18
1990-04-19
1990-04-20
1990-04-21
1990-04-22
1990-04-23
1990-04-24
1990-04-25
1990-04-26
1990-04-27
1990-04-28
1990-04-29
1990-04-30
1990-05-01
1990-05-02
1990-05-03
1990-05-04
1990-05-05
1990-05-06
1990-05-07
1990-05-08
1990-05-09
1990-05-10
1990-05-11
1990-05-12
1990-05-13
1990-05-14
1990-05-15
1990-05-16
1990-05-17
1990-05-18
1990-05-19
1990-05-20
1990-05-21
1990-05-22
1990-05-23
1990-05-24
1990-05-25
1990-05-26
1990-05-27
1990-05-28
1990-05-29
1990-05-30
1990-05-31
1990-06-01
1990-06-02
1990-06-03
1990-06-04
1990-06-05
1990-06-06
1990-06-07
1990-06-08
1990-06-09
1990-06-10
1990-06-11
1990-06-12
1990-06-13
1990-06-14
1990-06-15
1990-06-16
1990-06-17
1990-06-18
1990-06-19
1990-06-20
1990-06-21
1990-06-22
1990-06-23
1990-06-24
1990-06-25
1990-06-26
1990-06-27
1990-06-28
1990-06-29
1990-06-30
1990-07-01
1990-07-02
1990-07-03
1990-07-04
1990-07-05
1990-07-06
1990-07-07
1990-07-08
1990-07-09
1990-07-10
1990-07-11
1990-07-12
1990-07-13
1990-07-14
1990-07-15
1990-07-16
1990-07-17
1990-07-18
1990-07-19
1990-07-20
1990-07-21
1990-07-22
1990-07-23
1990-07-24
1990-07-25
1990-07-26
1990-07-27
1990-07-28
1990-07-29
1990-07-30
1990-07-31
1990-08-01
1990-08-02
1990-08-03
1990-08-04
1990-08-05
1990-08-06
1990-08-07
1990-08-08
1990-08-09
1990-08-10
1990-08-11
1990-08-12
1990-08-13
1990-08-14
1990-08-15
1990-08-16
1990-08-17
1990-08-18
1990-08-19
1990-08-20
1990-08-21
1990-08-22
1990-08-23
1990-08-24
1990-08-25
1990-08-26
1990-08-27
1990-08-28
1990-08-29
1990-08-30
1990-08-31
1990-09-01
1990-09-02
1990-09-03
1990-09-04
1990-09-05
1990-09-06
1990-09-07
1990-09-08
1990-09-09
1990-09-10
1990-09-11
1990-09-12
1990-09-13
1990-09-14
1990-09-15
1990-09-16
1990-09-17
1990-09-18
1990-09-19
1990-09-20
1990-09-21
1990-09-22
1990-09-23
1990-09-24
1990-09-25
1990-09-26
1990-09-27
1990-09-28
1990-09-29
1990-09-30
1990-10-01
1990-10-02
1990-10-03
1990-10-04
1990-10-05
1990-10-06
1990-10-07
1990-10-08
1990-10-09
1990-10-10
1990-10-11
1990-10-12
1990-10-13
1990-10-14
1990-10-15
1990-10-16
1990-10-17
1990-10-18
1990-10-19
1990-10-20
1990-10-21
1990-10-22
1990-10-23
1990-10-24
1990-10-25
1990-10-26
1990-10-27
1990-10-28
1990-10-29
1990-10-30
1990-10-31
1990-11-01
1990-11-02
1990-11-03
1990-11-04
1990-11-05
1990-11-06
1990-11-07
1990-11-08
1990-11-09
1990-11-10
1990-11-11
1990-11-12
1990-11-13
1990-11-14
1990-11-15
1990-11-16
1990-11-17
1990-11-18
1990-11-19
1990-11-20
1990-11-21
1990-11-22
1990-11-23
1990-11-24
1990-11-25
1990-11-26
1990-11-27
1990-11-28
1990-11-29
1990-11-30
1990-12-01
1990-12-02
1990-12-03
1990-12-04
1990-12-05
1990-12-06
1990-12-07
1990-12-08
1990-12-09
1990-12-10
1990-12-11
1990-12-12
1990-12-13
1990-12-14
1990-12-15
1990-12-16
1990-12-17
1990-12-18
1990-12-19
1990-12-20
1990-12-21
1990-12-22
1990-12-23
1990-12-24
1990-12-25
1990-12-26
1990-12-27
1990-12-28
1990-12-29
1990-12-30
1990-12-31
1991-01-01
1991-01-02
1991-01-03
1991-01-04
1991-01-05
1991-01-06
1991-01-07
1991-01-08
1991-01-09
1991-01-10
1991-01-11
1991-01-12
1991-01-13
1991-01-14
1991-01-15
1991-01-16
1991-01-17
1991-01-18
1991-01-19
1991-01-20
1991-01-21
1991-01-22
1991-01-23
1991-01-24
1991-01-25
1991-01-26
1991-01-27
1991-01-28
1991-01-29
1991-01-30
1991-01-31
1991-02-01
1991-02-02
1991-02-03
1991-02-04
1991-02-05
1991-02-06
1991-02-07
1991-02-08
1991-02-09
1991-02-10
1991-02-11
1991-02-12
1991-02-13
1991-02-14
1991-02-15
1991-02-16
1991-02-17
1991-02-18
1991-02-19
1991-02-20
1991-02-21
1991-02-22
1991-02-23
1991-02-24
1991-02-25
1991-02-26
1991-02-27
1991-02-28
1991-03-01
1991-03-02
1991-03-03
1991-03-04
1991-03-05
1991-03-06
1991-03-07
1991-03-08
1991-03-09
1991-03-10
1991-03-11
1991-03-12
1991-03-13
1991-03-14
1991-03-15
1991-03-16
1991-03-17
1991-03-18
1991-03-19
1991-03-20
1991-03-21
1991-03-22
1991-03-23
1991-03-24
1991-03-25
1991-03-26
1991-03-27
1991-03-28
1991-03-29
1991-03-30
1991-03-31
1991-04-01
1991-04-02
1991-04-03
1991-04-04
1991-04-05
1991-04-06
1991-04-07
1991-04-08
1991-04-09
1991-04-10
1991-04-11
1991-04-12
1991-04-13
1991-04-14
1991-04-15
1991-04-16
1991-04-17
1991-04-18
1991-04-19
1991-04-20
1991-04-21
1991-04-22
1991-04-23
1991-04-24
1991-04-25
1991-04-26
1991-04-27
1991-04-28
1991-04-29
1991-04-30
1991-05-01
1991-05-02
1991-05-03
1991-05-04
1991-05-05
1991-05-06
1991-05-07
1991-05-08
1991-05-09
1991-05-10
1991-05-11
1991-05-12
1991-05-13
1991-05-14
1991-05-15
1991-05-16
1991-05-17
1991-05-18
1991-05-19
1991-05-20
1991-05-21
1991-05-22
1991-05-23
1991-05-24
1991-05-25
1991-05-26
1991-05-27
1991-05-28
1991-05-29
1991-05-30
1991-05-31
1991-06-01
1991-06-02
1991-06-03
1991-06-04
1991-06-05
1991-06-06
1991-06-07
1991-06-08
1991-06-09
1991-06-10
1991-06-11
1991-06-12
1991-06-13
1991-06-14
1991-06-15
1991-06-16
1991-06-17
1991-06-18
1991-06-19
1991-06-20
1991-06-21
1991-06-22
1991-06-23
1991-06-24
1991-06-25
1991-06-26
1991-06-27
1991-06-28
1991-06-29
1991-06-30
1991-07-01
1991-07-02
1991-07-03
1991-07-04
1991-07-05
1991-07-06
1991-07-07
1991-07-08
1991-07-09
1991-07-10
1991-07-11
1991-07-12
1991-07-13
1991-07-14
1991-07-15
1991-07-16
1991-07-17
1991-07-18
1991-07-19
1991-07-20
1991-07-21
1991-07-22
1991-07-23
1991-07-24
1991-07-25
1991-07-26
1991-07-27
1991-07-28
1991-07-29
1991-07-30
1991-07-31
1991-08-01
1991-08-02
1991-08-03
1991-08-04
1991-08-05
1991-08-06
1991-08-07
1991-08-08
1991-08-09
1991-08-10
1991-08-11
1991-08-12
1991-08-13
1991-08-14
1991-08-15
1991-08-16
1991-08-17
1991-08-18
1991-08-19
1991-08-20
1991-08-21
1991-08-22
1991-08-23
1991-08-24
1991-08-25
1991-08-26
1991-08-27
1991-08-28
1991-08-29
1991-08-30
1991-08-31
1991-09-01
1991-09-02
1991-09-03
1991-09-04
1991-09-05
1991-09-06
1991-09-07
1991-09-08
1991-09-09
1991-09-10
1991-09-11
1991-09-12
1991-09-13
1991-09-14
1991-09-15
1991-09-16
1991-09-17
1991-09-18
1991-09-19
1991-09-20
1991-09-21
1991-09-22
1991-09-23
1991-09-24
1991-09-25
1991-09-26
1991-09-27
1991-09-28
1991-09-29
1991-09-30
1991-10-01
1991-10-02
1991-10-03
1991-10-04
1991-10-05
1991-10-06
1991-10-07
1991-10-08
1991-10-09
1991-10-10
1991-10-11
1991-10-12
1991-10-13
1991-10-14
1991-10-15
1991-10-16
1991-10-17
1991-10-18
1991-10-19
1991-10-20
1991-10-21
1991-10-22
1991-10-23
1991-10-24
1991-10-25
1991-10-26
1991-10-27
1991-10-28
1991-10-29
1991-10-30
1991-10-31
1991-11-01
1991-11-02
1991-11-03
1991-11-04
1991-11-05
1991-11-06
1991-11-07
1991-11-08
1991-11-09
1991-11-10
1991-11-11
1991-11-12
1991-11-13
1991-11-14
1991-11-15
1991-11-16
1991-11-17
1991-11-18
1991-11-19
1991-11-20
1991-11-21
1991-11-22
1991-11-23
1991-11-24
1991-11-25
1991-11-26
1991-11-27
1991-11-28
1991-11-29
1991-11-30
1991-12-01
1991-12-02
1991-12-03
1991-12-04
1991-12-05
1991-12-06
1991-12-07
1991-12-08
1991-12-09
1991-12-10
1991-12-11
1991-12-12
1991-12-13
1991-12-14
1991-12-15
1991-12-16
1991-12-17
1991-12-18
1991-12-19
1991-12-20
1991-12-21
1991-12-22
1991-12-23
1991-12-24
1991-12-25
1991-12-26
1991-12-27
1991-12-28
1991-12-29
1991-12-30
1991-12-31
1992-01-01
1992-01-02
1992-01-03
1992-01-04
1992-01-05
1992-01-06
1992-01-07
1992-01-08
1992-01-09
1992-01-10
1992-01-11
1992-01-12
1992-01-13
1992-01-14
1992-01-15
1992-01-16
1992-01-17
1992-01-18
1992-01-19
1992-01-20
1992-01-21
1992-01-22
1992-01-23
1992-01-24
1992-01-25
1992-01-26
1992-01-27
1992-01-28
1992-01-29
1992-01-30
1992-01-31
1992-02-01
1992-02-02
1992-02-03
1992-02-04
1992-02-05
1992-02-06
1992-02-07
1992-02-08
1992-02-09
1992-02-10
1992-02-11
1992-02-12
1992-02-13
1992-02-14
1992-02-15
1992-02-16
1992-02-17
1992-02-18
1992-02-19
1992-02-20
1992-02-21
1992-02-22
1992-02-23
1992-02-24
1992-02-25
1992-02-26
1992-02-27
1992-02-28
1992-02-29
1992-03-01
1992-03-02
1992-03-03
1992-03-04
1992-03-05
1992-03-06
1992-03-07
1992-03-08
1992-03-09
1992-03-10
1992-03-11
1992-03-12
1992-03-13
1992-03-14
1992-03-15
1992-03-16
1992-03-17
1992-03-18
1992-03-19
1992-03-20
1992-03-21
1992-03-22
1992-03-23
1992-03-24
1992-03-25
1992-03-26
1992-03-27
1992-03-28
1992-03-29
1992-03-30
1992-03-31
1992-04-01
1992-04-02
1992-04-03
1992-04-04
1992-04-05
1992-04-06
1992-04-07
1992-04-08
1992-04-09
1992-04-10
1992-04-11
1992-04-12
1992-04-13
1992-04-14
1992-04-15
1992-04-16
1992-04-17
1992-04-18
1992-04-19
1992-04-20
1992-04-21
1992-04-22
1992-04-23
1992-04-24
1992-04-25
1992-04-26
1992-04-27
1992-04-28
1992-04-29
1992-04-30
1992-05-01
1992-05-02
1992-05-03
1992-05-04
1992-05-05
1992-05-06
1992-05-07
1992-05-08
1992-05-09
1992-05-10
1992-05-11
1992-05-12
1992-05-13
1992-05-14
1992-05-15
1992-05-16
1992-05-17
1992-05-18
1992-05-19
1992-05-20
1992-05-21
1992-05-22
1992-05-23
1992-05-24
1992-05-25
1992-05-26
1992-05-27
1992-05-28
1992-05-29
1992-05-30
1992-05-31
1992-06-01
1992-06-02
1992-06-03
1992-06-04
1992-06-05
1992-06-06
1992-06-07
1992-06-08
1992-06-09
1992-06-10
1992-06-11
1992-06-12
1992-06-13
1992-06-14
1992-06-15
1992-06-16
1992-06-17
1992-06-18
1992-06-19
1992-06-20
1992-06-21
1992-06-22
1992-06-23
1992-06-24
1992-06-25
1992-06-26
1992-06-27
1992-06-28
1992-06-29
1992-06-30
1992-07-01
1992-07-02
1992-07-03
1992-07-04
1992-07-05
1992-07-06
1992-07-07
1992-07-08
1992-07-09
1992-07-10
1992-07-11
1992-07-12
1992-07-13
1992-07-14
1992-07-15
1992-07-16
1992-07-17
1992-07-18
1992-07-19
1992-07-20
1992-07-21
1992-07-22
1992-07-23
1992-07-24
1992-07-25
1992-07-26
1992-07-27
1992-07-28
1992-07-29
1992-07-30
1992-07-31
1992-08-01
1992-08-02
1992-08-03
1992-08-04
1992-08-05
1992-08-06
1992-08-07
1992-08-08
1992-08-09
1992-08-10
1992-08-11
1992-08-12
1992-08-13
1992-08-14
1992-08-15
1992-08-16
1992-08-17
1992-08-18
1992-08-19
1992-08-20
1992-08-21
1992-08-22
1992-08-23
1992-08-24
1992-08-25
1992-08-26
1992-08-27
1992-08-28
1992-08-29
1992-08-30
1992-08-31
1992-09-01
1992-09-02
1992-09-03
1992-09-04
1992-09-05
1992-09-06
1992-09-07
1992-09-08
1992-09-09
1992-09-10
1992-09-11
1992-09-12
1992-09-13
1992-09-14
1992-09-15
1992-09-16
1992-09-17
1992-09-18
1992-09-19
1992-09-20
1992-09-21
1992-09-22
1992-09-23
1992-09-24
1992-09-25
1992-09-26
1992-09-27
1992-09-28
1992-09-29
1992-09-30
1992-10-01
1992-10-02
1992-10-03
1992-10-04
1992-10-05
1992-10-06
1992-10-07
1992-10-08
1992-10-09
1992-10-10
1992-10-11
1992-10-12
1992-10-13
1992-10-14
1992-10-15
1992-10-16
1992-10-17
1992-10-18
1992-10-19
1992-10-20
1992-10-21
1992-10-22
1992-10-23
1992-10-24
1992-10-25
1992-10-26
1992-10-27
1992-10-28
1992-10-29
1992-10-30
1992-10-31
1992-11-01
1992-11-02
1992-11-03
1992-11-04
1992-11-05
1992-11-06
1992-11-07
1992-11-08
1992-11-09
1992-11-10
1992-11-11
1992-11-12
1992-11-13
1992-11-14
1992-11-15
1992-11-16
1992-11-17
1992-11-18
1992-11-19
1992-11-20
1992-11-21
1992-11-22
1992-11-23
1992-11-24
1992-11-25
1992-11-26
1992-11-27
1992-11-28
1992-11-29
1992-11-30
1992-12-01
1992-12-02
1992-12-03
1992-12-04
1992-12-05
1992-12-06
1992-12-07
1992-12-08
1992-12-09
1992-12-10
1992-12-11
1992-12-12
1992-12-13
1992-12-14
1992-12-15
1992-12-16
1992-12-17
1992-12-18
1992-12-19
1992-12-20
1992-12-21
1992-12-22
1992-12-23
1992-12-24
1992-12-25
1992-12-26
1992-12-27
1992-12-28
1992-12-29
1992-12-30
1992-12-31
1993-01-01	0.0760071	0.0781344	0.0745251	0.216876	0.236005
1993-01-02	0.0758016	0.0779259	0.0743221	0.215928	0.235181
1993-01-03	0.0755973	0.0777185	0.0741203	0.215017	0.234386
1993-01-04	0.0753944	0.0775125	0.0739198	0.214138	0.233616
1993-01-05	0.0751926	0.0773077	0.0737205	0.213291	0.232871
1993-01-06	0.074992	0.0771041	0.0735223	0.212473	0.232147
1993-01-07	0.0747927	0.0769017	0.0733254	0.211681	0.231443
1993-01-08	0.0745945	0.0767005	0.0731296	0.210915	0.230758
1993-01-09	0.0743974	0.0765004	0.072935	0.210173	0.230089
1993-01-10	0.0742015	0.0763014	0.0727414	0.209452	0.229436
1993-01-11	0.0740068	0.0761036	0.0725491	0.208752	0.228797
1993-01-12	0.0738132	0.0759069	0.0723578	0.208071	0.22817
1993-01-13	0.0736206	0.0757114	0.0721676	0.207408	0.227556
1993-01-14	0.0734293	0.0755169	0.0719785	0.206762	0.226953
1993-01-15	0.073239	0.0753235	0.0717904	0.206131	0.22636
1993-01-16	0.0730498	0.0751312	0.0716034	0.205515	0.225776
1993-01-17	0.0728617	0.07494	0.0714176	0.204912	0.225201
1993-01-18	0.0726747	0.0747499	0.0712328	0.204323	0.224634
1993-01-19	0.0724886	0.0745608	0.0710491	0.203745	0.224075
1993-01-20	0.0723037	0.0743728	0.0708665	0.203179	0.223523
1993-01-21	0.0721197	0.0741859	0.0706849	0.202623	0.222975
1993-01-22	0.0719369	0.0740001	0.0705044	0.202078	0.222432
1993-01-23	0.071755	0.0738153	0.0703249	0.201542	0.221894
1993-01-24	0.0715743	0.0736316	0.0701465	0.201014	0.22136
1993-01-25	0.0713945	0.0734489	0.0699691	0.200495	0.220832
1993-01-26	0.0712158	0.0732671	0.0697927	0.199984	0.220309
1993-01-27	0.071038	0.0730864	0.0696173	0.199481	0.219791
1993-01-28	0.0708613	0.0729067	0.0694428	0.198984	0.219278
1993-01-29	0.0706856	0.0727279	0.0692694	0.198494	0.218771
1993-01-30	0.0705107	0.0725501	0.0690969	0.198011	0.218268
1993-01-31	0.0703369	0.0723732	0.0689253	0.197533	0.217769
1993-02-01	0.070164	0.0721973	0.0687547	0.197061	0.217275
1993-02-02	0.0699921	0.0720224	0.068585	0.196594	0.216785
1993-02-03	0.0698211	0.0718484	0.0684163	0.196132	0.216298
1993-02-04	0.069651	0.0716753	0.0682484	0.195675	0.215815
1993-02-05	0.0694819	0.0715031	0.0680815	0.195222	0.215335
1993-02-06	0.0693136	0.0713319	0.0679155	0.194774	0.214858
1993-02-07	0.0691463	0.0711616	0.0677503	0.194331	0.214384
1993-02-08	0.0689799	0.0709921	0.067586	0.193891	0.213913
1993-02-09	0.0688144	0.0708236	0.0674226	0.193455	0.213444
1993-02-10	0.0686498	0.0706561	0.0672601	0.193023	0.212978
1993-02-11	0.068486	0.0704894	0.0670985	0.192595	0.212514
1993-02-12	0.0683231	0.0703236	0.0669378	0.19217	0.212053
1993-02-13	0.0681611	0.0701588	0.066778	0.191748	0.211594
1993-02-14	0.0679999	0.0699948	0.066619	0.19133	0.211137
1993-02-15	0.0678397	0.0698317	0.066461	0.190914	0.210682
1993-02-16	0.0676803	0.0696694	0.0663038	0.190501	0.210229
1993-02-17	0.0675218	0.069508	0.0661474	0.19009	0.209779
1993-02-18	0.0673641	0.0693475	0.065992	0.189682	0.20933
1993-02-19	0.0672073	0.0691877	0.0658373	0.189275	0.208883
1993-02-20	0.0670513	0.0690287	0.0656835	0.188871	0.208438
1993-02-21	0.0668962	0.0688706	0.0655306	0.18847	0.207995
1993-02-22	0.0667418	0.0687134	0.0653784	0.188071	0.207554
1993-02-23	0.0665883	0.0685569	0.065227	0.187674	0.207115
1993-02-24	0.0664355	0.0684012	0.0650764	0.18728	0.206677
1993-02-25	0.0662836	0.0682463	0.0649266	0.186889	0.206241
1993-02-26	0.0661324	0.0680922	0.0647776	0.1865	0.205807
1993-02-27	0.0659819	0.0679388	0.0646293	0.186113
1993-02-28	0.0658323	0.0677862	0.0644818	0.185729	0.204945
1993-03-01	0.0656834	0.0676344	0.0643351	0.185347	0.204516
1993-03-02	0.0628001	0.0658931	0.0630811	0.184966	0.204022
1993-03-03	0.0758249	0.0709882	0.0668005	0.184582	0.205297
1993-03-04	0.233153	0.180132	0.156051	0.184536	0.212154
1993-03-05	0.449644	0.359709	0.312918	0.184699	0.216414
1993-03-06	0.632325	0.518847	0.455196	0.184905	0.220043
1993-03-07	0.965808	0.820126	0.736446	0.185235	0.226404
1993-03-08	1.55159	1.3545	1.25426	0.186153	0.236188
1993-03-09	2.40586	2.07078	1.95788	0.189232	0.245821
1993-03-10	3.36694	2.69363	2.52373	0.194744	0.25248
1993-03-11	4.03623	3.03007	2.77313	0.202451	0.254646
1993-03-12	4.02664	2.9924	2.71008	0.21056	0.253769
1993-03-13	3.75913	2.81056	2.53049	0.217883	0.251974
1993-03-14	3.41535	2.58422	2.31783	0.224085	0.249975
1993-03-15	3.06699	2.35435	2.10617	0.229153	0.248033
1993-03-16	2.743	2.13834	1.90964	0.233187	0.246238
1993-03-17	2.45391	1.94293	1.73343	0.236328	0.244616
1993-03-18	2.20179	1.76986	1.57849	0.238719	0.243163
1993-03-19	1.98479	1.61839	1.44376	0.240492	0.241863
1993-03-20	1.79941	1.48666	1.3273	0.241762	0.240695
1993-03-21	1.6416	1.37243	1.22688	0.242628	0.23964
1993-03-22	1.50734	1.27338	1.1403	0.24317	0.238679
1993-03-23	1.39297	1.18736	1.06549	0.243456	0.237794
1993-03-24	1.26888	1.10493	1.00064	0.243507	0.236972
1993-03-25	1.29047	1.01074	0.882974	0.243461	0.23565
1993-03-26	2.5951	1.72621	1.30496	0.244237	0.248266
1993-03-27	4.59853	3.63265	2.65921	0.26426	0.269756
1993-03-28	5.02527	5.58697	4.19844	0.294653	0.294855
1993-03-29	4.70217	6.79814	5.18935	0.309785	0.312122
1993-03-30	4.14624	7.00571	5.64399	0.330072	0.326491
1993-03-31	3.57283	6.98313	6.46195	0.367371	0.342688
1993-04-01	3.04943	6.66416	7.5508	0.399716	0.36114
1993-04-02	2.58242	5.95869	8.51615	0.432798	0.391764
1993-04-03	2.14772	5.08526	8.16867	0.463599	0.433001
1993-04-04	1.76976	4.23849	7.19108	0.490339	0.469409
1993-04-05	1.45374	3.48783	6.08814	0.513659	0.499811
1993-04-06	1.19429	2.8455	5.04661	0.530787	0.524221
1993-04-07	0.983754	2.31065	4.12987	0.542678	0.543371
1993-04-08	0.819844	1.87491	3.35266	0.555251	0.559025
1993-04-09	0.697727	1.53121	2.70873	0.574628	0.572045
1993-04-10	0.605188	1.25771	2.18256	0.595086	0.582339
1993-04-11	0.531992	1.04061	1.75654	0.612062	0.589838
1993-04-12	0.475019	0.871697	1.41349	0.626327	0.594504
1993-04-13	0.4279	0.7374	1.14431	0.637789	0.600747
1993-04-14	0.390111	0.631713	0.92558	0.637821	0.59725
1993-04-15	0.373827	0.562208	0.751133	0.653222	0.596443
1993-04-16	0.371435	0.518203	0.612852	0.67808	0.595932
1993-04-17	0.375931	0.490127	0.503356	0.70424	0.594689
1993-04-18	0.383869	0.472592	0.417627	0.728882	0.593535
1993-04-19	0.391021	0.45984	0.350315	0.748505	0.591754
1993-04-20	0.394107	0.447384	0.29676	0.760726	0.588904
1993-04-21	0.390521	0.431669	0.254113	0.763581	0.58527
1993-04-22	0.383203	0.414891	0.219927	0.760891	0.580764
1993-04-23	0.381364	0.40568	0.192059	0.762328	0.575196
1993-04-24	0.387477	0.406055	0.169336	0.770117	0.569173
1993-04-25	0.399116	0.41323	0.15267	0.782102	0.565011
1993-04-26	0.404702	0.415326	0.14086	0.787382	0.562641
1993-04-27	0.383809	0.391852	0.11881	0.753855	0.534232
1993-04-28	0.425355	0.431847	0.207503	0.846055	0.66391
1993-04-29	0.460626	0.466926	0.288883	1.03409	0.94583
1993-04-30	0.483327	0.488744	0.314703	1.13582	1.11477
1993-05-01	0.48926	0.493793	0.305601	1.12052	1.11283
1993-05-02	0.478747	0.482597	0.28666	1.07999	1.0625
1993-05-03	0.462059	0.464933	0.263978	1.03254	0.997628
1993-05-04	0.451642	0.453554	0.240164	0.993561	0.931074
1993-05-05	0.453977	0.455046	0.218131	0.97012	0.869396
1993-05-06	0.465468	0.46593	0.197949	0.958914	0.813894
1993-05-07	0.482247	0.485139	0.17685	0.955017	0.762307
1993-05-08	0.494407	0.505324	0.161685	0.957174	0.72363
1993-05-09	0.658522	0.678517	0.318855	1.11855	0.841183
1993-05-10	0.919965	0.955491	0.554934	1.32737	1.00714
1993-05-11	1.02271	1.05924	0.614796	1.3855	1.03924
1993-05-12	1.0292	1.05912	0.588589	1.37152	1.00539
1993-05-13	1.0035	1.02703	0.535324	1.34083	0.951605
1993-05-14	0.962864	0.98118	0.476754	1.29977	0.894426
1993-05-15	0.916305	0.930522	0.426997	1.25826	0.848107
1993-05-16	0.857294	0.868372	0.379452	1.2	0.806055
1993-05-17	0.779402	0.788057	0.332802	1.11391	0.754377
1993-05-18	0.705357	0.712081	0.293149	1.03353	0.708328
1993-05-19	0.650691	0.655851	0.268234	0.979397	0.682954
1993-05-20	0.605048	0.608969	0.251095	0.936572	0.667166
1993-05-21	0.57049	0.573437	0.236372	0.9054	0.653669
1993-05-22	0.551478	0.553666	0.222376	0.889341	0.640672
1993-05-23	0.541857	0.543454	0.209246	0.881625	0.627803
1993-05-24	0.550598	0.551736	0.200429	0.892116	0.619051
1993-05-25	0.55951	0.560293	0.194388	0.900435	0.612223
1993-05-26	0.555492	0.556009	0.191033	0.896553	0.607139
1993-05-27	0.539069	0.539392	0.182763	0.875419	0.593323
1993-05-28	0.522925	0.523106	0.175947	0.854514	0.581696
1993-05-29	0.500595	0.500695	0.164852	0.824978	0.56303
1993-05-30	0.490603	0.493372	0.15958	0.81308	0.555572
1993-05-31	0.47554	0.494999	0.157273	0.796479	0.552094
1993-06-01	0.451328	0.497831	0.153496	0.772184	0.547836
1993-06-02	0.429887	0.502747	0.149984	0.750764	0.543747
1993-06-03	0.411728	0.505727	0.146628	0.732069	0.539306
1993-06-04	0.3973	0.511258	0.142608	0.716812	0.533753
1993-06-05	0.387643	0.520713	0.137828	0.70588	0.527046
1993-06-06	0.38132	0.531441	0.133536	0.69802	0.520638
1993-06-07	0.359881	0.515266	0.110645	0.672803	0.494468
1993-06-08	0.478941	0.618692	0.231263	0.794686	0.61364
1993-06-09	0.638319	0.751238	0.389866	0.954754	0.769983
1993-06-10	0.665959	0.760524	0.416709	0.976297	0.794256
1993-06-11	0.634429	0.729302	0.397766	0.94054	0.773605
1993-06-12	0.562298	0.679493	0.35038	0.865176	0.724146
1993-06-13	0.596935	0.743967	0.413591	0.900303	0.788549
1993-06-14	0.587143	0.772806	0.432138	0.889806	0.806362
1993-06-15	0.534906	0.756156	0.405813	0.835896	0.777739
1993-06-16	0.476808	0.710824	0.370405	0.775991	0.741133
1993-06-17	0.432377	0.660214	0.345276	0.729244	0.715744
1993-06-18	0.394553	0.608815	0.323504	0.68897	0.691397
1993-06-19	0.34941	0.542249	0.291577	0.642217	0.656969
1993-06-20	0.296457	0.462458	0.249372	0.58694	0.611256
1993-06-21	0.318591	0.45749	0.279855	0.609891	0.642005
1993-06-22	0.35183	0.465936	0.319924	0.642759	0.68095
1993-06-23	0.339376	0.43191	0.312926	0.629032	0.671969
1993-06-24	0.315222	0.389574	0.293168	0.602796	0.649478
1993-06-25	0.289065	0.34839	0.270482	0.57454	0.624159
1993-06-26	0.266104	0.313189	0.250262	0.549645	0.601734
1993-06-27	0.251732	0.288947	0.238045	0.5333	0.587242
1993-06-28	0.246738	0.276063	0.234736	0.527655	0.583015
1993-06-29	0.233168	0.256215	0.222492	0.512334	0.568511
1993-06-30	0.234186	0.252264	0.224551	0.512612	0.569411
1993-07-01	0.20939	0.221834	0.201022	0.493287	0.552746
1993-07-02	0.620996	0.632063	0.613297	0.837492	0.884847
1993-07-03	0.886455	0.895212	0.880154	1.04797	1.08458
1993-07-04	1.1535	1.16057	1.14834	1.2885	1.32357
1993-07-05	1.15824	1.16389	1.15355	1.30681	1.34396
1993-07-06	1.55566	1.56038	1.55182	1.62462	1.66025
1993-07-07	1.7231	1.72693	1.71973	1.72525	1.76005
1993-07-08	1.62152	1.62456	1.6181	1.62848	1.66528
1993-07-09	1.43353	1.43593	1.42991	1.46988	1.50932
1993-07-10	1.23068	1.23258	1.22682	1.30191	1.34391
1993-07-11	1.0415	1.04301	1.03742	1.14618	1.19047
1993-07-12	0.877073	0.878281	0.872806	1.01101	1.05721
1993-07-13	0.737305	0.738283	0.7329	0.895353	0.943113
1993-07-14	0.620269	0.621068	0.615746	0.798237	0.847231
1993-07-15	0.523479	0.524141	0.518873	0.716865	0.766792
1993-07-16	0.443306	0.443854	0.438621	0.649113	0.699862
1993-07-17	0.462443	0.462903	0.45764	0.680196	0.732279
1993-07-18	0.446541	0.446943	0.44167	0.670006	0.723525
1993-07-19	0.494121	0.494487	0.489324	0.712211	0.763679
1993-07-20	0.539635	0.539962	0.534942	0.748719	0.796477
1993-07-21	0.511609	0.511896	0.506911	0.721889	0.768863
1993-07-22	0.467131	0.467383	0.462404	0.681831	0.729159
1993-07-23	0.421618	0.42184	0.416853	0.641446	0.689627
1993-07-24	0.379615	0.379812	0.374822	0.603377	0.652293
1993-07-25	0.320323	0.320496	0.315505	0.548419	0.598054
1993-07-26	0.632319	0.632488	0.627415	0.8623	0.913553
1993-07-27	0.752668	0.752841	0.74771	0.985088	1.03758
1993-07-28	0.892583	0.892775	0.887797	1.11433	1.16451
1993-07-29	0.923855	0.924049	0.919183	1.13834	1.18639
1993-07-30	0.853358	0.853546	0.848718	1.06723	1.11481
1993-07-31	0.75522	0.755391	0.750548	0.971304	1.01908
1993-08-01	0.657328	0.65749	0.652645	0.875785	0.924117
1993-08-02	0.567733	0.567884	0.563026	0.788441	0.837309
1993-08-03	0.495494	0.495635	0.490773	0.718103	0.767492
1993-08-04	0.433616	0.43375	0.428888	0.65757	0.707458
1993-08-05	0.389005	0.389132	0.384271	0.613947	0.664229
1993-08-06	0.349346	0.349472	0.344627	0.574725	0.625364
1993-08-07	0.3115	0.311623	0.306788	0.536657	0.58737
1993-08-08	0.197418	0.197467	0.19383	0.421401	0.480397
1993-08-09	0.974509	0.97497	0.974115	0.985622	0.993742
1993-08-10	1.5996	1.59999	1.60225	1.40491	1.36553
1993-08-11	1.65879	1.65895	1.6616	1.43645	1.38934
1993-08-12	1.54002	1.54002	1.54199	1.35306	1.31231
1993-08-13	1.37981	1.37973	1.38071	1.24705	1.21697
1993-08-14	1.19532	1.19521	1.19516	1.12001	1.10179
1993-08-15	1.04749	1.04738	1.04636	1.02564	1.01873
1993-08-16	1.14109	1.141	1.13905	1.16325	1.16399
1993-08-17	1.07526	1.0752	1.07251	1.13652	1.14493
1993-08-18	0.962144	0.962111	0.958786	1.0573	1.07282
1993-08-19	0.889033	0.889027	0.885165	1.01287	1.0344
1993-08-20	0.791558	0.791578	0.787264	0.939395	0.965979
1993-08-21	0.691987	0.692032	0.687361	0.859231	0.889936
1993-08-22	0.600477	0.600541	0.595585	0.783198	0.817195
1993-08-23	0.522928	0.523007	0.51782	0.717824	0.754418
1993-08-24	0.460802	0.460895	0.45554	0.664756	0.703345
1993-08-25	0.415435	0.41554	0.410058	0.626943	0.66733
1993-08-26	0.374635	0.374748	0.36916	0.592139	0.634027
1993-08-27	0.351	0.351115	0.345442	0.57304	0.615973
1993-08-28	0.33096	0.331078	0.3253	0.557858	0.6015
1993-08-29	0.312461	0.31258	0.306689	0.542668	0.586773
1993-08-30	0.30187	0.301991	0.295992	0.534244	0.578761
1993-08-31	0.293752	0.293874	0.287757	0.527138	0.571948
1993-09-01	0.285685	0.285808	0.279558	0.519055	0.56401
1993-09-02	0.281208	0.281333	0.274945	0.514139	0.559148
1993-09-03	0.278473	0.278601	0.272072	0.512477	0.557723
1993-09-04	0.274619	0.274751	0.268095	0.508418	0.553748
1993-09-05	0.273036	0.273173	0.266395	0.50735	0.552801
1993-09-06	0.270157	0.270297	0.263397	0.503959	0.549384
1993-09-07	0.267419	0.267564	0.260563	0.500814	0.546834
1993-09-08	0.262971	0.263121	0.256026	0.494921	0.541148
1993-09-09	0.266872	0.267023	0.259852	0.497498	0.543586
1993-09-10	0.302456	0.302605	0.295275	0.538795	0.584134
1993-09-11	0.310901	0.311052	0.303542	0.546205	0.591106
1993-09-12	0.308122	0.308278	0.300621	0.539647	0.584205
1993-09-13	0.31029	0.310451	0.302667	0.538716	0.583222
1993-09-14	0.309754	0.309922	0.302029	0.535147	0.579629
1993-09-15	0.306088	0.306262	0.298283	0.528043	0.572375
1993-09-16	0.301651	0.301809	0.29379	0.520122	0.564232
1993-09-17	0.294508	0.294809	0.286606	0.50925	0.553101
1993-09-18	0.281028	0.281959	0.273088	0.49189	0.535462
1993-09-19	0.27425	0.27535	0.266294	0.48216	0.52547
1993-09-20	0.270071	0.271142	0.262116	0.475546	0.518603
1993-09-21	0.266648	0.267621	0.258698	0.470051	0.512863
1993-09-22	0.265719	0.266573	0.257777	0.467243	0.509789
1993-09-23	0.267809	0.268547	0.259882	0.468245	0.510879
1993-09-24	0.267595	0.268229	0.259691	0.467012	0.50973
1993-09-25	0.265614	0.266158	0.257732	0.463842	0.506486
1993-09-26	0.266468	0.266936	0.258605	0.463594	0.506114
1993-09-27	0.268847	0.269254	0.261008	0.465263	0.507837
1993-09-28	0.264749	0.265108	0.256938	0.459915	0.502429
1993-09-29	0.263788	0.264108	0.256002	0.457828	0.500177
1993-09-30	0.25856	0.258781	0.250803	0.451067	0.493196
1993-10-01	0.245123	0.245794	0.237383	0.435469	0.477344
1993-10-02	0.235287	0.236804	0.227555	0.423677	0.465284
1993-10-03	0.222946	0.224642	0.215191	0.409371	0.45068
1993-10-04	0.216808	0.218288	0.209755	0.40166	0.443456
1993-10-05	0.217207	0.217232	0.21511	0.401018	0.44791
1993-10-06	0.218913	0.217433	0.221698	0.402068	0.454004
1993-10-07	0.225678	0.223982	0.228054	0.408565	0.459955
1993-10-08	0.22409	0.220506	0.234824	0.406205	0.466294
1993-10-09	0.222523	0.216791	0.241187	0.403913	0.472174
1993-10-10	0.227261	0.221186	0.245927	0.408385	0.476374
1993-10-11	0.233334	0.227855	0.248993	0.414308	0.478833
1993-10-12	0.238661	0.233939	0.25124	0.419333	0.480414
1993-10-13	0.238676	0.233652	0.253268	0.418728	0.481732
1993-10-14	0.241966	0.237345	0.254922	0.421602	0.482639
1993-10-15	0.24589	0.242015	0.255875	0.42515	0.482817
1993-10-16	0.250167	0.247113	0.257036	0.429065	0.483223
1993-10-17	0.249223	0.24692	0.253366	0.427241	0.478321
1993-10-18	0.236293	0.234582	0.238228	0.41271	0.461276
1993-10-19	0.226472	0.225196	0.22647	0.401569	0.447913
1993-10-20	0.227218	0.22734	0.225977	0.401652	0.446505
1993-10-21	0.229716	0.229386	0.231977	0.404058	0.452655
1993-10-22	0.226856	0.223013	0.231719	0.401056	0.452218
1993-10-23	0.216566	0.211029	0.220024	0.390166	0.439531
1993-10-24	0.211135	0.205282	0.212329	0.384339	0.431021
1993-10-25	0.217536	0.212105	0.216587	0.390877	0.435082
1993-10-26	0.222382	0.217854	0.219676	0.395531	0.437699
1993-10-27	0.221707	0.21866	0.217541	0.394329	0.434756
1993-10-28	0.232194	0.230162	0.226881	0.403435	0.442462
1993-10-29	0.249086	0.248193	0.241801	0.436893	0.472743
1993-10-30	0.2535	0.253354	0.249588	0.468793	0.500592
1993-10-31	0.252622	0.250491	0.261019	0.489346	0.517283
1993-11-01	0.24873	0.243094	0.271585	0.499259	0.526231
1993-11-02	0.250391	0.242067	0.28059	0.504725	0.530993
1993-11-03	0.259057	0.25077	0.285961	0.506296	0.531112
1993-11-04	0.271242	0.264421	0.2917	0.507878	0.531754
1993-11-05	0.280673	0.275352	0.297199	0.506128	0.532609
1993-11-06	0.280122	0.273801	0.302225	0.494581	0.533513
1993-11-07	0.269288	0.262688	0.291617	0.473298	0.518144
1993-11-08	0.258255	0.251429	0.281621	0.453144	0.503946
1993-11-09	0.24825	0.24016	0.275174	0.435422	0.49402
1993-11-10	0.236489	0.228702	0.260294	0.416966	0.475434
1993-11-11	0.225066	0.218317	0.243887	0.399843	0.455549
1993-11-12	0.214841	0.209353	0.228626	0.384822	0.437185
1993-11-13	0.206054	0.201801	0.215309	0.372019	0.421152
1993-11-14	0.198671	0.195523	0.204047	0.361278	0.407525
1993-11-15	0.192549	0.190342	0.194689	0.352345	0.396108
1993-11-16	0.18751	0.18608	0.186995	0.344941	0.386611
1993-11-17	0.183382	0.182623	0.18064	0.338826	0.378678
1993-11-18	0.181822	0.181376	0.1774	0.33565	0.37415
1993-11-19	0.179899	0.179923	0.173466	0.332294	0.368961
1993-11-20	0.180177	0.180161	0.176677	0.331672	0.371777
1993-11-21	0.183924	0.181157	0.193589	0.335043	0.389529
1993-11-22	0.188794	0.182171	0.213869	0.339754	0.410958
1993-11-23	0.19368	0.183101	0.23357	0.344537	0.43173
1993-11-24	0.198075	0.18388	0.251069	0.348811	0.450092
1993-11-25	0.202138	0.184561	0.266637	0.352735	0.466354
1993-11-26	0.204152	0.184548	0.272604	0.354441	0.472243
1993-11-27	0.201804	0.183211	0.262882	0.351376	0.461163
1993-11-28	0.19762	0.181407	0.248255	0.346291	0.444755
1993-11-29	0.192993	0.179536	0.233268	0.340712	0.427935
1993-11-30	0.188561	0.177762	0.219556	0.335338	0.412475
1993-12-01	0.184585	0.176144	0.207628	0.330457	0.398933
1993-12-02	0.181137	0.174696	0.197535	0.326152	0.387368
1993-12-03	0.178201	0.173409	0.189135	0.322408	0.37763
1993-12-04	0.175723	0.172267	0.182215	0.319168	0.369493
1993-12-05	0.173637	0.171249	0.17655	0.31636	0.362714
1993-12-06	0.171877	0.170337	0.171927	0.313912	0.357064
1993-12-07	0.170383	0.169511	0.168158	0.311761	0.352339
1993-12-08	0.169104	0.168757	0.16508	0.30985	0.348365
1993-12-09	0.167998	0.168061	0.162557	0.308132	0.344997
1993-12-10	0.167029	0.167412	0.160479	0.30657	0.342113
1993-12-11	0.166169	0.166801	0.158755	0.305131	0.339616
1993-12-12	0.165396	0.166221	0.157312	0.303792	0.337427
1993-12-13	0.164692	0.165665	0.156091	0.302532	0.335482
1993-12-14	0.164041	0.16513	0.155045	0.301336	0.33373
1993-12-15	0.163434	0.164611	0.154138	0.300191	0.332133
1993-12-16	0.162861	0.164106	0.15334	0.299088	0.330658
1993-12-17	0.162316	0.163612	0.152628	0.298018	0.32928
1993-12-18	0.161792	0.163127	0.151984	0.296976	0.32798
1993-12-19	0.161286	0.162649	0.151394	0.295957	0.326741
1993-12-20	0.160794	0.162179	0.150846	0.294957	0.325553
1993-12-21	0.160314	0.161714	0.150331	0.293974	0.324404
1993-12-22	0.159844	0.161254	0.149843	0.293004	0.323288
1993-12-23	0.159381	0.160798	0.149377	0.292047	0.322198
1993-12-24	0.158925	0.160346	0.148927	0.2911	0.321131
1993-12-25	0.158475	0.159898	0.148491	0.290162	0.320083
1993-12-26	0.15803	0.159453	0.148067	0.289233	0.31905
1993-12-27	0.157589	0.159012	0.147651	0.288313	0.318031
1993-12-28	0.157152	0.158573	0.147243	0.287399	0.317024
1993-12-29	0.156719	0.158137	0.146842	0.286493	0.316027
1993-12-30	0.156289	0.157703	0.146445	0.285593	0.31504
1993-12-31	0.155862	0.157272	0.146054	0.284699	0.314061
1994-01-01	0.155438	0.156844	0.145666	0.283811	0.313089
1994-01-02	0.155016	0.156418	0.145282	0.28293	0.312125
1994-01-03	0.154597	0.155994	0.144901	0.282054	0.311168
1994-01-04	0.154181	0.155572	0.144523	0.281183	0.310218
1994-01-05	0.153767	0.155153	0.144148	0.280318	0.309273
1994-01-06	0.153355	0.154736	0.143775	0.279458	0.308335
1994-01-07	0.152945	0.154321	0.143404	0.278603	0.307403
1994-01-08	0.152538	0.153909	0.143036	0.277754	0.306476
1994-01-09	0.152132	0.153498	0.14267	0.27691	0.305555
1994-01-10	0.151729	0.15309	0.142306	0.27607	0.304639
1994-01-11	0.151328	0.152684	0.141943	0.275236	0.303728
1994-01-12	0.150929	0.15228	0.141583	0.274406	0.302823
1994-01-13	0.150532	0.151877	0.141225	0.273582	0.301923
1994-01-14	0.150137	0.151477	0.140868	0.272762	0.301028
1994-01-15	0.149745	0.151079	0.140514	0.271946	0.300138
1994-01-16	0.149354	0.150683	0.140161	0.271136	0.299252
1994-01-17	0.148965	0.150289	0.13981	0.27033	0.298372
1994-01-18	0.148578	0.149897	0.13946	0.269528	0.297497
1994-01-19	0.148193	0.149507	0.139113	0.268732	0.296626
1994-01-20	0.147809	0.149118	0.138766	0.26794	0.295761
1994-01-21	0.147428	0.148732	0.138422	0.267152	0.2949
1994-01-22	0.147049	0.148348	0.13808	0.266368	0.294044
1994-01-23	0.146671	0.147965	0.137739	0.265589	0.293192
1994-01-24	0.146296	0.147584	0.137399	0.264815	0.292345
1994-01-25	0.145922	0.147206	0.137062	0.264044	0.291503
1994-01-26	0.14555	0.146829	0.136726	0.263278	0.290666
1994-01-27	0.14518	0.146454	0.136391	0.262517	0.289832
1994-01-28	0.144811	0.14608	0.136058	0.261759	0.289003
1994-01-29	0.144445	0.145709	0.135727	0.261006	0.288178
1994-01-30	0.14408	0.145339	0.135397	0.260257	0.287359
1994-01-31	0.143717	0.144971	0.135069	0.259511	0.286543
1994-02-01	0.143355	0.144605	0.134742	0.25877	0.285731
1994-02-02	0.142996	0.14424	0.134417	0.258033	0.284924
1994-02-03	0.142638	0.143878	0.134094	0.2573	0.284122
1994-02-04	0.142281	0.143517	0.133771	0.256571	0.283323
1994-02-05	0.141927	0.143158	0.133451	0.255846	0.282528
1994-02-06	0.141574	0.1428	0.133132	0.255125	0.281738
1994-02-07	0.141223	0.142444	0.132814	0.254407	0.280952
1994-02-08	0.140873	0.14209	0.132498	0.253694	0.28017
1994-02-09	0.140525	0.141737	0.132183	0.252984	0.279392
1994-02-10	0.140179	0.141387	0.13187	0.252278	0.278617
1994-02-11	0.139834	0.141037	0.131558	0.251576	0.277848
1994-02-12	0.139491	0.14069	0.131247	0.250878	0.277081
1994-02-13	0.13915	0.140344	0.130938	0.250183	0.276319
1994-02-14	0.13881	0.139999	0.130631	0.249492	0.275561
1994-02-15	0.138472	0.139657	0.130324	0.248804	0.274807
1994-02-16	0.138135	0.139315	0.13002	0.24812	0.274056
1994-02-17	0.1378	0.138976	0.129716	0.24744	0.273309
1994-02-18	0.137466	0.138638	0.129414	0.246763	0.272566
1994-02-19	0.137134	0.138301	0.129113	0.24609	0.271827
1994-02-20	0.136803	0.137966	0.128814	0.24542	0.271091
1994-02-21	0.136474	0.137633	0.128516	0.244754	0.270359
1994-02-22	0.136146	0.137301	0.128219	0.244091	0.269631
1994-02-23	0.13582	0.13697	0.127923	0.243432	0.268906
1994-02-24	0.135496	0.136641	0.127629	0.242775	0.268185
1994-02-25	0.135172	0.136314	0.127336	0.242123	0.267468
1994-02-26	0.13485	0.135988	0.127044	0.241473	0.266754
1994-02-27	0.13453	0.135663	0.126754	0.240827	0.266044
1994-02-28	0.134211	0.13534	0.126465	0.240184	0.265337
1994-03-01	0.133894	0.135018	0.126177	0.239544	0.264633
1994-03-02	0.133578	0.134698	0.125891	0.238913	0.263938
1994-03-03	0.133263	0.134379	0.125605	0.238284	0.263245
1994-03-04	0.13212	0.133395	0.124745	0.237645	0.262499
1994-03-05	0.128335	0.128745	0.120634	0.237035	0.262959
1994-03-06	0.198864	0.189376	0.180252	0.237443	0.271225
1994-03-07	0.778403	0.748205	0.73907	0.244827	0.293233
1994-03-08	1.98435	1.91675	1.92942	0.255936	0.31887
1994-03-09	2.9085	2.81132	2.85142	0.267494	0.333814
1994-03-10	3.25116	3.13495	3.18375	0.27853	0.340049
1994-03-11	3.31266	3.18649	3.23673	0.287709	0.342814
1994-03-12	3.23148	3.08953	3.13816	0.294561	0.343788
1994-03-13	3.09529	3.06799	3.11943	0.305754	0.346336
1994-03-14	2.98159	3.18753	3.24536	0.330991	0.366687
1994-03-15	2.74039	3.0325	3.05545	0.351999	0.402217
1994-03-16	2.38972	2.6839	2.68565	0.377284	0.435442
1994-03-17	2.03718	2.3036	2.2914	0.410406	0.464506
1994-03-18	1.7034	1.93347	1.92886	0.419002	0.489592
1994-03-19	1.41661	1.60994	1.61508	0.425678	0.51138
1994-03-20	1.18376	1.34216	1.34801	0.440752	0.523129
1994-03-21	0.980832	1.10912	1.11368	0.434436	0.509315
1994-03-22	0.818366	0.921462	0.92201	0.430138	0.494927
1994-03-23	0.68307	0.765514	0.763258	0.419926	0.47643
1994-03-24	0.568791	0.634706	0.631062	0.403863	0.454205
1994-03-25	0.484039	0.536746	0.531753	0.400465	0.445667
1994-03-26	0.431501	0.472228	0.464596	0.419864	0.458196
1994-03-27	0.393373	0.421827	0.416581	0.440275	0.476698
1994-03-28	0.365185	0.381118	0.381601	0.459092	0.495762
1994-03-29	0.340686	0.346293	0.35459	0.470277	0.512039
1994-03-30	0.325784	0.328563	0.333479	0.485453	0.52526
1994-03-31	0.31612	0.315241	0.316263	0.500255	0.535033
1994-04-01	0.307013	0.299583	0.300896	0.508085	0.540595
1994-04-02	0.309755	0.298585	0.296322	0.531653	0.552652
1994-04-03	0.296775	0.285202	0.280616	0.536728	0.55573
1994-04-04	0.281856	0.271439	0.265972	0.534941	0.55651
1994-04-05	0.276436	0.263109	0.262547	0.536426	0.562576
1994-04-06	0.27356	0.25764	0.261916	0.536431	0.568066
1994-04-07	0.2758	0.26204	0.26191	0.541428	0.572059
1994-04-08	0.2802	0.269583	0.261414	0.547825	0.574109
1994-04-09	0.284755	0.276982	0.267182	0.560301	0.582394
1994-04-10	0.297072	0.280899	0.273265	0.598941	0.612726
1994-04-11	0.315635	0.294668	0.275604	0.618616	0.621812
1994-04-12	0.339308	0.321728	0.27612	0.637364	0.620414
1994-04-13	0.369167	0.35269	0.275048	0.658127	0.614393
1994-04-14	0.400464	0.385674	0.273758	0.682164	0.607376
1994-04-15	0.424227	0.41254	0.275954	0.700012	0.603202
1994-04-16	0.424102	0.429321	0.271385	0.692237	0.589464
1994-04-17	0.420439	0.447463	0.269119	0.683905	0.581427
1994-04-18	0.419169	0.465533	0.267137	0.680165	0.57537
1994-04-19	0.42673	0.478089	0.265747	0.686273	0.570834
1994-04-20	0.437156	0.482542	0.265259	0.694979	0.567503
1994-04-21	0.440627	0.478491	0.264262	0.696644	0.563909
1994-04-22	0.43823	0.468688	0.262654	0.692711	0.559872
1994-04-23	0.432884	0.457644	0.260126	0.685683	0.554902
1994-04-24	0.425477	0.449272	0.256432	0.676711	0.548861
1994-04-25	0.423532	0.452463	0.254507	0.673562	0.544745
1994-04-26	0.424338	0.458666	0.254584	0.672468	0.542643
1994-04-27	0.416605	0.455157	0.254855	0.662894	0.540875
1994-04-28	0.402264	0.445983	0.254794	0.646903	0.538928
1994-04-29	0.384686	0.435074	0.253891	0.627878	0.536262
1994-04-30	0.367195	0.426486	0.252523	0.609041	0.533226
1994-05-01	0.350542	0.41799	0.25063	0.590969	0.529595
1994-05-02	0.334497	0.407523	0.247431	0.573424	0.524566
1994-05-03	0.32014	0.395879	0.243317	0.557522	0.518484
1994-05-04	0.310679	0.384251	0.240531	0.546749	0.514589
1994-05-05	0.296796	0.36692	0.233642	0.531543	0.507339
1994-05-06	0.285969	0.352452	0.231323	0.519636	0.5041
1994-05-07	0.276127	0.337844	0.229211	0.508579	0.500549
1994-05-08	0.266726	0.323136	0.226243	0.497815	0.495848
1994-05-09	0.257917	0.307011	0.222629	0.487493	0.490306
1994-05-10	0.250476	0.291629	0.21933	0.478592	0.485141
1994-05-11	0.246766	0.280824	0.218902	0.473342	0.482797
1994-05-12	0.244704	0.272816	0.219468	0.46965	0.481359
1994-05-13	0.242314	0.265659	0.219165	0.465598	0.479053
1994-05-14	0.2396	0.259318	0.218161	0.460758	0.475582
1994-05-15	0.235613	0.252232	0.2155	0.455062	0.470917
1994-05-16	0.231231	0.245317	0.21215	0.449434	0.466082
1994-05-17	0.22902	0.241079	0.210734	0.446331	0.463581
1994-05-18	0.228326	0.238948	0.210908	0.442413	0.460219
1994-05-19	0.219777	0.229053	0.203211	0.428826	0.447062
1994-05-20	0.22972	0.238522	0.213564	0.43839	0.457037
1994-05-21	0.282387	0.291931	0.266252	0.507661	0.53066
1994-05-22	0.326976	0.336462	0.31148	0.554158	0.578743
1994-05-23	0.3368	0.345494	0.321489	0.563591	0.58825
1994-05-24	0.336078	0.343943	0.320814	0.561894	0.586138
1994-05-25	0.329113	0.336283	0.313853	0.553195	0.576777
1994-05-26	0.317612	0.32423	0.302353	0.539449	0.562298
1994-05-27	0.303416	0.309604	0.288171	0.523023	0.545166
1994-05-28	0.288248	0.294092	0.273053	0.505504	0.527017
1994-05-29	0.274385	0.279955	0.259251	0.489435	0.510426
1994-05-30	0.26376	0.2691	0.24871	0.476477	0.497015
1994-05-31	0.256476	0.261622	0.241531	0.466835	0.486991
1994-06-01	0.248439	0.253418	0.233623	0.456459	0.476277
1994-06-02	0.239899	0.244744	0.225186	0.445983	0.465542
1994-06-03	0.232268	0.236993	0.217676	0.436329	0.455664
1994-06-04	0.224626	0.229241	0.210165	0.426651	0.445801
1994-06-05	0.217871	0.22239	0.203537	0.41804	0.437056
1994-06-06	0.213297	0.217724	0.199095	0.41147	0.430356
1994-06-07	0.214653	0.218989	0.200616	0.411476	0.43037
1994-06-08	0.211644	0.215898	0.197783	0.406883	0.425768
1994-06-09	0.205663	0.209854	0.191951	0.399502	0.418352
1994-06-10	0.197553	0.201656	0.184087	0.388855	0.407724
1994-06-11	0.225646	0.229571	0.212534	0.414153	0.433167
1994-06-12	0.271092	0.274933	0.258193	0.459917	0.479102
1994-06-13	0.277544	0.281363	0.264775	0.465648	0.484797
1994-06-14	0.270003	0.27383	0.257342	0.457238	0.476285
1994-06-15	0.286198	0.290022	0.273632	0.473904	0.493016
1994-06-16	0.285156	0.288963	0.272713	0.472448	0.491546
1994-06-17	0.274372	0.278143	0.262083	0.460458	0.479458
1994-06-18	0.259983	0.263705	0.247863	0.444361	0.463228
1994-06-19	0.246193	0.249863	0.234213	0.428791	0.447525
1994-06-20	0.240902	0.244513	0.229071	0.421478	0.440082
1994-06-21	0.233804	0.237351	0.222138	0.412693	0.431251
1994-06-22	0.225221	0.228717	0.213663	0.402927	0.421454
1994-06-23	0.216748	0.220179	0.205347	0.39258	0.411003
1994-06-24	0.205758	0.209132	0.19454	0.379888	0.398221
1994-06-25	0.195375	0.1987	0.184182	0.367814	0.386045
1994-06-26	0.191902	0.19518	0.18075	0.363081	0.381322
1994-06-27	0.197695	0.200922	0.186639	0.367723	0.386044
1994-06-28	0.21174	0.214933	0.200745	0.381051	0.399452
1994-06-29	0.274087	0.277243	0.263161	0.44479	0.463498
1994-06-30	0.308033	0.311157	0.297171	0.4776	0.496335
1994-07-01	0.334137	0.337218	0.32332	0.501854	0.520442
1994-07-02	0.326977	0.330035	0.316196	0.492832	0.511226
1994-07-03	0.263906	0.266954	0.253157	0.427668	0.445788
1994-07-04	0.530083	0.533102	0.519373	0.695744	0.714262
1994-07-05	0.749735	0.75269	0.73913	0.916459	0.935242
1994-07-06	0.761161	0.764087	0.750608	0.926424	0.945143
1994-07-07	0.704159	0.707071	0.69364	0.867445	0.88599
1994-07-08	0.629791	0.632692	0.619294	0.790929	0.809258
1994-07-09	0.556462	0.559342	0.546019	0.715258	0.733374
1994-07-10	0.435384	0.438025	0.425825	0.581037	0.598014
1994-07-11	0.876526	0.878813	0.868273	1.00604	1.02198
1994-07-12	1.98528	1.98698	1.97846	2.01233	2.02213
1994-07-13	2.17691	2.17818	2.17054	2.16701	2.17422
1994-07-14	2.03919	2.0404	2.03252	2.03172	2.03881
1994-07-15	1.80478	1.80608	1.79764	1.81375	1.82178
1994-07-16	1.60124	1.60268	1.59362	1.63134	1.64106
1994-07-17	1.38226	1.38386	1.3742	1.43167	1.44278
1994-07-18	1.17575	1.17751	1.16733	1.2418	1.2541
1994-07-19	0.98979	0.991705	0.981069	1.07004	1.08337
1994-07-20	0.830478	0.832526	0.821514	0.921914	0.936016
1994-07-21	0.70262	0.704773	0.69348	0.803488	0.81828
1994-07-22	0.594821	0.597056	0.585563	0.703161	0.718511
1994-07-23	0.503257	0.505554	0.493929	0.617094	0.632832
1994-07-24	0.426977	0.429307	0.417695	0.544836	0.56084
1994-07-25	0.364349	0.366696	0.355106	0.485145	0.501336
1994-07-26	0.314862	0.317228	0.305609	0.437989	0.454324
1994-07-27	0.275598	0.278016	0.26623	0.40028	0.416675
1994-07-28	0.243393	0.245807	0.234046	0.36906	0.385504
1994-07-29	0.217062	0.21948	0.207843	0.343292	0.359751
1994-07-30	0.196062	0.198463	0.186817	0.322392	0.338831
1994-07-31	0.27906	0.281457	0.26952	0.412452	0.429755
1994-08-01	0.302565	0.304937	0.293039	0.437801	0.455337
1994-08-02	0.291327	0.293678	0.281892	0.425918	0.443423
1994-08-03	0.270053	0.27239	0.260681	0.403661	0.421065
1994-08-04	0.247387	0.249707	0.238069	0.37952	0.396758
1994-08-05	0.224873	0.227171	0.21567	0.355518	0.372583
1994-08-06	0.196784	0.199046	0.187744	0.326046	0.34296
1994-08-07	0.225991	0.228252	0.216907	0.354463	0.371296
1994-08-08	0.283481	0.285708	0.274425	0.413113	0.429614
1994-08-09	0.28753	0.289731	0.278537	0.416145	0.432402
1994-08-10	0.271365	0.27355	0.262435	0.398658	0.414783
1994-08-11	0.248908	0.251081	0.240017	0.375105	0.391159
1994-08-12	0.246496	0.248677	0.237681	0.370771	0.386904
1994-08-13	0.512862	0.514836	0.504704	0.621804	0.635079
1994-08-14	0.581889	0.583766	0.573943	0.685509	0.697447
1994-08-15	0.559022	0.560877	0.551104	0.66174	0.673488
1994-08-16	0.50488	0.506739	0.496953	0.608672	0.620704
1994-08-17	0.444051	0.445927	0.436066	0.549858	0.562356
1994-08-18	0.388659	0.390577	0.380532	0.496595	0.50957
1994-08-19	0.344728	0.346675	0.33652	0.45502	0.468524
1994-08-20	0.305977	0.307942	0.297737	0.418301	0.432303
1994-08-21	0.270607	0.272583	0.262383	0.384249	0.398637
1994-08-22	0.239502	0.241482	0.231301	0.354012	0.368688
1994-08-23	0.213156	0.215135	0.204994	0.328328	0.343223
1994-08-24	0.192519	0.194519	0.184309	0.308221	0.323289
1994-08-25	0.179303	0.181307	0.171033	0.295409	0.310613
1994-08-26	0.168752	0.170751	0.16051	0.285884	0.30131
1994-08-27	0.163061	0.165059	0.154823	0.280364	0.29593
1994-08-28	0.196476	0.198474	0.188229	0.316361	0.332173
1994-08-29	0.219171	0.221156	0.210941	0.337008	0.353035
1994-08-30	0.220882	0.222871	0.212624	0.337394	0.353501
1994-08-31	0.213517	0.215506	0.205272	0.328914	0.344977
1994-09-01	0.202482	0.204475	0.194247	0.317244	0.333228
1994-09-02	0.191373	0.193365	0.183168	0.305537	0.321416
1994-09-03	0.171854	0.173813	0.163788	0.282816	0.298075
1994-09-04	0.247643	0.24973	0.238521	0.380187	0.398612
1994-09-05	0.318084	0.318508	0.307094	0.498995	0.525652
1994-09-06	0.326988	0.326884	0.315693	0.519256	0.548038
1994-09-07	0.31043	0.310372	0.299387	0.497713	0.525978
1994-09-08	0.285711	0.285885	0.275084	0.463167	0.489982
1994-09-09	0.260183	0.260634	0.249981	0.426981	0.45209
1994-09-10	0.236588	0.237304	0.22679	0.393329	0.416761
1994-09-11	0.215506	0.216458	0.206056	0.363336	0.385243
1994-09-12	0.202307	0.203461	0.193144	0.342847	0.363467
1994-09-13	0.19253	0.193846	0.183635	0.327008	0.346588
1994-09-14	0.182534	0.18398	0.173865	0.311797	0.330471
1994-09-15	0.174129	0.175681	0.165634	0.299184	0.317112
1994-09-16	0.171177	0.172814	0.162827	0.292664	0.309956
1994-09-17	0.167172	0.168871	0.158962	0.285548	0.302297
1994-09-18	0.161497	0.163245	0.153396	0.277392	0.293696
1994-09-19	0.155721	0.157508	0.147709	0.2696	0.285542
1994-09-20	0.150431	0.152247	0.142493	0.262649	0.278292
1994-09-21	0.154048	0.155886	0.146156	0.264882	0.280287
1994-09-22	0.254673	0.256538	0.246728	0.372341	0.388382
1994-09-23	0.299225	0.301075	0.291347	0.417994	0.435025
1994-09-24	0.301556	0.303381	0.293763	0.424205	0.442819
1994-09-25	0.286661	0.288482	0.278916	0.40887	0.427729
1994-09-26	0.267086	0.268913	0.259376	0.387137	0.405659
1994-09-27	0.24732	0.249156	0.239643	0.364883	0.382863
1994-09-28	0.22936	0.231204	0.221712	0.344577	0.361982
1994-09-29	0.214217	0.216067	0.206599	0.327288	0.34414
1994-09-30	0.201267	0.203121	0.193686	0.312403	0.328754
1994-10-01	0.190246	0.192101	0.182699	0.299762	0.315684
1994-10-02	0.181853	0.183709	0.174336	0.29001	0.305563
1994-10-03	0.175432	0.177284	0.167951	0.282383	0.297626
1994-10-04	0.17072	0.17257	0.163269	0.276655	0.291635
1994-10-05	0.166593	0.168436	0.159179	0.271594	0.286351
1994-10-06	0.153777	0.155607	0.146401	0.258633	0.273286
1994-10-07	0.227206	0.229095	0.219742	0.326924	0.34099
1994-10-08	0.350328	0.352228	0.342852	0.429126	0.440747
1994-10-09	0.380737	0.382623	0.373312	0.45383	0.464612
1994-10-10	0.370899	0.372753	0.363567	0.444773	0.455499
1994-10-11	0.351331	0.353173	0.344059	0.428349	0.439278
1994-10-12	0.329975	0.331817	0.322746	0.410693	0.421913
1994-10-13	0.309864	0.31171	0.30267	0.394099	0.405622
1994-10-14	0.292724	0.294574	0.285563	0.380021	0.391825
1994-10-15	0.277685	0.279564	0.27056	0.367097	0.379029
1994-10-16	0.272424	0.2741	0.265329	0.367257	0.380111
1994-10-17	0.262677	0.263628	0.25555	0.367974	0.383087
1994-10-18	0.286459	0.287229	0.279325	0.395333	0.411223
1994-10-19	0.328143	0.328924	0.320889	0.438266	0.454212
1994-10-20	0.349098	0.350524	0.341353	0.461279	0.476898
1994-10-21	0.346871	0.349359	0.338316	0.461248	0.476142
1994-10-22	0.348492	0.351421	0.339339	0.465195	0.47951
1994-10-23	0.351548	0.354645	0.341969	0.47027	0.484129
1994-10-24	0.354977	0.358127	0.34509	0.475312	0.488801
1994-10-25	0.358235	0.361388	0.348129	0.4798	0.492988
1994-10-26	0.360869	0.364	0.350607	0.48333	0.49627
1994-10-27	0.363341	0.366421	0.352975	0.486456	0.499196
1994-10-28	0.360687	0.363864	0.35025	0.483881	0.496458
1994-10-29	0.349494	0.353254	0.33881	0.472303	0.484503
1994-10-30	0.347603	0.351514	0.336809	0.470362	0.482339
1994-10-31	0.349436	0.353314	0.338626	0.472214	0.484074
1994-11-01	0.35318	0.356963	0.342398	0.475983	0.48778
1994-11-02	0.348904	0.352557	0.338189	0.471299	0.483083
1994-11-03	0.330332	0.333822	0.31971	0.451588	0.463396
1994-11-04	0.308421	0.31175	0.297894	0.428331	0.440169
1994-11-05	0.28733	0.290516	0.276894	0.405908	0.41777
1994-11-06	0.268751	0.27178	0.258419	0.386112	0.398011
1994-11-07	0.254941	0.257999	0.244784	0.371276	0.383274
1994-11-08	0.242964	0.246426	0.231182	0.358157	0.368439
1994-11-09	0.233559	0.23626	0.226773	0.347891	0.363362
1994-11-10	0.228891	0.227869	0.239814	0.342801	0.376623
1994-11-11	0.231291	0.226089	0.25761	0.34515	0.394921
1994-11-12	0.240839	0.232605	0.275971	0.354772	0.413625
1994-11-13	0.253406	0.244795	0.28644	0.368065	0.425005
1994-11-14	0.289715	0.282157	0.317006	0.417067	0.465931
1994-11-15	0.373927	0.368086	0.39419	0.607075	0.639874
1994-11-16	0.41289	0.408798	0.426872	0.671475	0.696311
1994-11-17	0.431417	0.428934	0.439967	0.681505	0.701944
1994-11-18	0.441805	0.440714	0.445803	0.672664	0.690402
1994-11-19	0.43068	0.430679	0.431046	0.639092	0.655216
1994-11-20	0.40643	0.407264	0.403886	0.592914	0.608031
1994-11-21	0.380018	0.381497	0.375142	0.546848	0.561296
1994-11-22	0.355322	0.357291	0.34858	0.505269	0.519242
1994-11-23	0.333669	0.335948	0.325384	0.469475	0.48303
1994-11-24	0.315185	0.317729	0.305717	0.439321	0.452595
1994-11-25	0.299705	0.302466	0.28933	0.414314	0.427392
1994-11-26	0.286891	0.289825	0.275824	0.393779	0.406713
1994-11-27	0.276356	0.279425	0.264765	0.377018	0.389842
1994-11-28	0.267725	0.270897	0.255741	0.363382	0.376118
1994-11-29	0.26066	0.26391	0.248385	0.352297	0.364961
1994-11-30	0.254869	0.258175	0.242383	0.343277	0.35588
1994-12-01	0.250103	0.253451	0.237471	0.335916	0.348466
1994-12-02	0.246118	0.249549	0.233355	0.329846	0.342314
1994-12-03	0.24432	0.24703	0.231536	0.326448	0.338912
1994-12-04	0.243327	0.245263	0.230586	0.324145	0.336599
1994-12-05	0.241883	0.243722	0.229155	0.321652	0.334096
1994-12-06	0.240441	0.24242	0.227708	0.319343	0.331769
1994-12-07	0.239098	0.241286	0.226356	0.317273	0.329669
1994-12-08	0.237858	0.240261	0.225112	0.315414	0.327771
1994-12-09	0.236705	0.239303	0.223962	0.313725	0.32604
1994-12-10	0.235622	0.238387	0.222891	0.312172	0.324442
1994-12-11	0.234594	0.237497	0.221885	0.310725	0.322952
1994-12-12	0.23361	0.236623	0.220931	0.309364	0.321547
1994-12-13	0.232661	0.235759	0.22002	0.308069	0.320211
1994-12-14	0.23174	0.234904	0.219144	0.306828	0.31893
1994-12-15	0.230841	0.234054	0.218295	0.30563	0.317694
1994-12-16	0.229962	0.233209	0.21747	0.304467	0.316495
1994-12-17	0.229098	0.232368	0.216665	0.303333	0.315327
1994-12-18	0.228248	0.231533	0.215875	0.302223	0.314185
1994-12-19	0.22741	0.230701	0.2151	0.301133	0.313064
1994-12-20	0.226582	0.229874	0.214336	0.300059	0.311961
1994-12-21	0.225763	0.229052	0.213582	0.299002	0.310875
1994-12-22	0.224952	0.228235	0.212837	0.297957	0.309803
1994-12-23	0.224148	0.227422	0.2121	0.296924	0.308743
1994-12-24	0.223352	0.226615	0.211371	0.295902	0.307694
1994-12-25	0.222562	0.225812	0.210648	0.29489	0.306656
1994-12-26	0.221779	0.225014	0.209931	0.293888	0.305627
1994-12-27	0.221001	0.224222	0.20922	0.292894	0.304607
1994-12-28	0.220229	0.223434	0.208514	0.291908	0.303596
1994-12-29	0.219463	0.222651	0.207814	0.29093	0.302592
1994-12-30	0.218702	0.221874	0.207119	0.289959	0.301595
1994-12-31	0.217946	0.221101	0.206428	0.288996	0.300607
1995-01-01	0.217195	0.220333	0.205743	0.28804	0.299625
1995-01-02	0.216449	0.21957	0.205061	0.287091	0.298649
1995-01-03	0.215708	0.218812	0.204384	0.286147	0.297681
1995-01-04	0.214972	0.218059	0.203712	0.285211	0.296719
1995-01-05	0.214241	0.21731	0.203044	0.284281	0.295763
1995-01-06	0.213514	0.216566	0.20238	0.283357	0.294814
1995-01-07	0.212792	0.215827	0.20172	0.282439	0.29387
1995-01-08	0.212074	0.215093	0.201064	0.281528	0.292933
1995-01-09	0.211361	0.214363	0.200412	0.280622	0.292002
1995-01-10	0.210653	0.213637	0.199765	0.279722	0.291076
1995-01-11	0.209949	0.212917	0.199121	0.278827	0.290157
1995-01-12	0.209249	0.2122	0.198481	0.277939	0.289243
1995-01-13	0.208553	0.211488	0.197845	0.277056	0.288334
1995-01-14	0.207862	0.210781	0.197213	0.276178	0.287432
1995-01-15	0.207175	0.210077	0.196584	0.275306	0.286534
1995-01-16	0.206492	0.209379	0.195959	0.27444	0.285643
1995-01-17	0.205814	0.208684	0.195338	0.273578	0.284756
1995-01-18	0.205139	0.207994	0.194721	0.272722	0.283876
1995-01-19	0.204469	0.207307	0.194107	0.271871	0.283
1995-01-20	0.203802	0.206625	0.193497	0.271026	0.282129
1995-01-21	0.20314	0.205947	0.19289	0.270185	0.281264
1995-01-22	0.202481	0.205274	0.192287	0.26935	0.280404
1995-01-23	0.201827	0.204604	0.191687	0.26852	0.279549
1995-01-24	0.201176	0.203938	0.191091	0.267694	0.278699
1995-01-25	0.200529	0.203276	0.190498	0.266874	0.277854
1995-01-26	0.199886	0.202618	0.189909	0.266059	0.277014
1995-01-27	0.199246	0.201964	0.189323	0.265248	0.276179
1995-01-28	0.198611	0.201314	0.18874	0.264442	0.275349
1995-01-29	0.197979	0.200667	0.18816	0.263641	0.274523
1995-01-30	0.197351	0.200025	0.187584	0.262844	0.273703
1995-01-31	0.196726	0.199386	0.187011	0.262052	0.272887
1995-02-01	0.196105	0.198751	0.186442	0.261265	0.272075
1995-02-02	0.195488	0.198119	0.185875	0.260482	0.271269
1995-02-03	0.194874	0.197491	0.185312	0.259704	0.270467
1995-02-04	0.194264	0.196867	0.184752	0.258931	0.269669
1995-02-05	0.193657	0.196247	0.184195	0.258161	0.268876
1995-02-06	0.193054	0.19563	0.183641	0.257396	0.268088
1995-02-07	0.192454	0.195016	0.18309	0.256636	0.267304
1995-02-08	0.191857	0.194406	0.182542	0.25588	0.266524
1995-02-09	0.191264	0.1938	0.181997	0.255128	0.265749
1995-02-10	0.190674	0.193197	0.181455	0.254381	0.264978
1995-02-11	0.190088	0.192597	0.180917	0.253637	0.264211
1995-02-12	0.189505	0.192001	0.180381	0.252898	0.263449
1995-02-13	0.188925	0.191408	0.179847	0.252163	0.26269
1995-02-14	0.188348	0.190818	0.179317	0.251432	0.261936
1995-02-15	0.187775	0.190232	0.17879	0.250705	0.261186
1995-02-16	0.187204	0.189649	0.178265	0.249982	0.260441
1995-02-17	0.186637	0.189069	0.177744	0.249263	0.259699
1995-02-18	0.186073	0.188493	0.177225	0.248549	0.258961
1995-02-19	0.185512	0.187919	0.176709	0.247838	0.258227
1995-02-20	0.184954	0.187349	0.176195	0.247131	0.257498
1995-02-21	0.184399	0.186782	0.175685	0.246428	0.256772
1995-02-22	0.183847	0.186218	0.175177	0.245728	0.25605
1995-02-23	0.183299	0.185657	0.174672	0.245033	0.255332
1995-02-24	0.182753	0.1851	0.174169	0.244341	0.254618
1995-02-25	0.18221	0.184545	0.173669	0.243653	0.253908
1995-02-26	0.18167	0.183993	0.173172	0.242969	0.253201
1995-02-27	0.181133	0.183444	0.172677	0.242288	0.252498
1995-02-28	0.180599	0.182899	0.172185	0.241611	0.251799
1995-03-01	0.180068	0.182356	0.171695	0.240938	0.251104
1995-03-02	0.179539	0.181816	0.171208	0.240268	0.250412
1995-03-03	0.179013	0.181279	0.170724	0.239602	0.249724
1995-03-04	0.178491	0.180745	0.170242	0.23894	0.249039
1995-03-05	0.17797	0.180214	0.169762	0.238281	0.248359
1995-03-06	0.177453	0.179685	0.169285	0.237625	0.247681
1995-03-07	0.176939	0.179159	0.168811	0.236973	0.247007
1995-03-08	0.176427	0.178637	0.168338	0.236324	0.246337
1995-03-09	0.175917	0.178116	0.167869	0.235679	0.24567
1995-03-10	0.175411	0.177599	0.167401	0.235037	0.245006
1995-03-11	0.174907	0.177084	0.166936	0.234398	0.244346
1995-03-12	0.174406	0.176573	0.166473	0.233687	0.243614
1995-03-13	0.173675	0.176026	0.166013	0.233739	0.243645
1995-03-14	0.164824	0.166497	0.156384	0.233659	0.243215
1995-03-15	0.24888	0.234945	0.229042	0.233711	0.252089
1995-03-16	0.593203	0.568477	0.553073	0.236755	0.26231
1995-03-17	0.863523	0.837521	0.806632	0.241483	0.267407
1995-03-18	1.0328	1.00969	0.967179	0.245898	0.269829
1995-03-19	1.13644	1.11198	1.06045	0.25383	0.276
1995-03-20	1.37172	1.33346	1.2748	0.263494	0.288069
1995-03-21	1.73744	1.69117	1.62415	0.274462	0.299948
1995-03-22	1.96961	1.90734	1.83063	0.285457	0.310755
1995-03-23	2.3035	2.14645	2.06018	0.296397	0.323329
1995-03-24	3.15982	2.67012	2.48235	0.31535	0.343537
1995-03-25	4.16869	3.27274	2.89649	0.338277	0.358788
1995-03-26	4.91158	3.81214	3.35654	0.368802	0.379825
1995-03-27	6.47148	5.18934	4.71005	0.634696	0.633452
1995-03-28	7.42111	6.09973	5.64875	1.20824	1.18488
1995-03-29	8.26112	6.97162	6.57322	1.68392	1.64373
1995-03-30	9.68993	8.44009	8.12504	2.00334	1.95981
1995-03-31	10.1063	8.95965	8.72721	2.17693	2.14046
1995-04-01	9.96957	8.94884	8.78655	2.23571	2.20881
1995-04-02	9.28273	8.39257	8.28181	2.20767	2.1895
1995-04-03	8.40521	7.63743	7.56705	2.11908	2.1089
1995-04-04	7.49708	6.83929	6.80124	1.99304	1.98976
1995-04-05	6.62705	6.06593	6.05373	1.84749	1.84976
1995-04-06	5.82485	5.34763	5.3558	1.69539	1.70181
1995-04-07	5.10163	4.69664	4.72052	1.54559	1.55484
1995-04-08	4.45902	4.11592	4.15152	1.4037	1.41462
1995-04-09	3.89376	3.60349	3.64745	1.273	1.28463
1995-04-10	3.40009	3.15485	3.20436	1.15506	1.16662
1995-04-11	2.96616	2.76428	2.81708	1.05029	1.06122
1995-04-12	2.61323	2.3858	2.44005	0.958446	0.967896
1995-04-13	2.76653	2.411	2.39126	0.878865	0.894994
1995-04-14	3.35372	3.14121	3.91729	0.825687	0.856389
1995-04-15	3.37719	3.80747	6.00124	0.804614	0.837224
1995-04-16	3.0789	3.86908	6.23522	0.803825	0.828316
1995-04-17	2.69017	3.59675	5.70152	0.803364	0.812984
1995-04-18	2.27876	3.1779	4.93434	0.772576	0.777583
1995-04-19	1.91765	2.74559	4.16068	0.753995	0.748543
1995-04-20	1.63242	2.3605	3.46923	0.764687	0.739505
1995-04-21	1.40797	2.03072	2.87476	0.789144	0.73783
1995-04-22	1.2337	1.7568	2.37581	0.82009	0.738251
1995-04-23	1.09335	1.52367	1.9636	0.846055	0.738583
1995-04-24	0.98513	1.33573	1.62746	0.872092	0.738586
1995-04-25	0.901591	1.18549	1.35547	0.89517	0.737748
1995-04-26	0.831234	1.06008	1.13864	0.909318	0.738091
1995-04-27	0.760489	0.944011	0.961131	0.903949	0.732138
1995-04-28	0.671043	0.817935	0.803857	0.862756	0.707633
1995-04-29	0.586338	0.703439	0.67845	0.815908	0.686447
1995-04-30	0.507448	0.60116	0.573319	0.76558	0.661987
1995-05-01	0.455714	0.529451	0.493257	0.736768	0.645867
1995-05-02	0.438682	0.497775	0.443668	0.739611	0.648825
1995-05-03	0.428929	0.478983	0.405016	0.744989	0.650966
1995-05-04	0.397938	0.439953	0.361096	0.722715	0.636052
1995-05-05	0.380348	0.418779	0.328329	0.712924	0.625941
1995-05-06	0.392666	0.429554	0.312846	0.732519	0.630093
1995-05-07	0.406295	0.438749	0.30466	0.753643	0.637326
1995-05-08	0.387629	0.414632	0.284611	0.737363	0.626493
1995-05-09	0.387254	0.409764	0.26886	0.738363	0.617783
1995-05-10	0.426621	0.445871	0.267344	0.779806	0.623497
1995-05-11	0.469536	0.486401	0.265848	0.824588	0.6275
1995-05-12	0.509545	0.529366	0.269155	0.863207	0.635444
1995-05-13	0.522236	0.535278	0.283806	0.884208	0.654752
1995-05-14	0.486761	0.497579	0.276997	0.859881	0.656656
1995-05-15	0.448863	0.459749	0.271609	0.829723	0.658662
1995-05-16	0.439801	0.464404	0.285625	0.823154	0.679569
1995-05-17	0.444647	0.48719	0.2987	0.860119	0.731214
1995-05-18	0.454701	0.513377	0.31089	0.873613	0.75213
1995-05-19	0.46833	0.535047	0.320883	0.880716	0.757701
1995-05-20	0.487806	0.550562	0.332242	0.891023	0.760412
1995-05-21	0.507739	0.561206	0.339079	0.898728	0.75658
1995-05-22	0.551391	0.595432	0.373138	0.950572	0.797168
1995-05-23	0.639368	0.678518	0.461196	1.19032	1.03603
1995-05-24	0.6592	0.696607	0.482836	1.302	1.15259
1995-05-25	0.657216	0.697185	0.485721	1.2946	1.15185
1995-05-26	0.6431	0.690745	0.480828	1.24182	1.10872
1995-05-27	0.6165	0.680485	0.470821	1.16897	1.0519
1995-05-28	0.587393	0.673146	0.460674	1.09527	0.996115
1995-05-29	0.557804	0.666613	0.44971	1.0258	0.944032
1995-05-30	0.527542	0.656424	0.436429	0.961308	0.895298
1995-05-31	0.499018	0.641767	0.422743	0.904083	0.85177
1995-06-01	0.472739	0.619532	0.409081	0.853981	0.813258
1995-06-02	0.450813	0.58856	0.397659	0.812665	0.781564
1995-06-03	0.433333	0.556157	0.388832	0.779235	0.756012
1995-06-04	0.41837	0.524539	0.380913	0.751259	0.734417
1995-06-05	0.404295	0.494233	0.372539	0.726504	0.714787
1995-06-06	0.38645	0.461622	0.359264	0.700315	0.692685
1995-06-07	0.405296	0.467586	0.381802	0.709025	0.704627
1995-06-08	0.464787	0.516155	0.44433	0.754662	0.752792
1995-06-09	0.471951	0.514194	0.453833	0.755945	0.756072
1995-06-10	0.458476	0.493204	0.442184	0.739466	0.741157
1995-06-11	0.438135	0.466736	0.423285	0.717213	0.720122
1995-06-12	0.416247	0.439896	0.402539	0.693871	0.697721
1995-06-13	0.394551	0.414221	0.381746	0.670939	0.675511
1995-06-14	0.374585	0.391073	0.362491	0.64998	0.655104
1995-06-15	0.360072	0.374027	0.348534	0.634542	0.64008
1995-06-16	0.346865	0.358804	0.335797	0.620134	0.625982
1995-06-17	0.334099	0.344441	0.323395	0.60642	0.612494
1995-06-18	0.321728	0.330802	0.311331	0.59274	0.598973
1995-06-19	0.311224	0.319295	0.301068	0.581521	0.587865
1995-06-20	0.300325	0.3076	0.290364	0.571086	0.577529
1995-06-21	0.291958	0.298606	0.282141	0.562826	0.569327
[truncated: 14,398 more rows]
